# Supplementary material
Source: PubMed Central journal article supplement (PMC7718309)
Supplement: NIHMS1644377-supplement-Suppl__Info_001.pdf [file NIHMS1644377-supplement-Suppl__Info_001.pdf]

# Research on The Human Proteome Reaches a Major Milestone: >90% of Predicted Human Proteins Now Credibly Detected, according to the HUPO Human Proteome Project

*Gilbert S Omenn<sup>1,2</sup>, Lydie Lane<sup>3</sup>, Christopher M Overall<sup>4</sup>, Ileana M. Cristea<sup>5</sup>,  
Fernando J Corrales<sup>6</sup>, Cecilia Lindskog<sup>7</sup>, Young-Ki Paik<sup>8</sup>, Jennifer E Van Eyk<sup>9</sup>,  
Siqi Liu<sup>10</sup>, Stephen Pennington<sup>11</sup>, Michael P Snyder<sup>12</sup>, Mark S Baker<sup>13</sup>, Nuno Bandeira<sup>14</sup>,  
Ruedi Aebersold<sup>15</sup>, Robert L. Moritz<sup>2</sup>, and Eric W Deutsch<sup>2</sup>*

<sup>1</sup>University of Michigan, <sup>2</sup>Institute for Systems Biology, <sup>3</sup>CALIPHO Group, SIB Swiss Institute of Bioinformatics, <sup>4</sup>University of British Columbia, <sup>5</sup>Princeton University, <sup>6</sup>Centro Nacional de Biotecnologia, <sup>7</sup>Uppsala University, <sup>8</sup>Yonsei Proteome Research Center, <sup>9</sup>Cedars Sinai, <sup>10</sup>BGI Group, <sup>11</sup>University College Dublin, <sup>12</sup>Stanford University, <sup>13</sup>Macquarie University, <sup>14</sup>University of California, San Diego, <sup>15</sup>ETH-Zurich and University of Zurich

## Supporting Information Table of Contents

Supplementary Table 1 – neXtProt PeptideAtlas Massive PE1 Entries

Supplementary Table 2 – Types of Evidence for the 950 Non-MS-Based PE1 neXtProt Proteins

Supplementary Table 3 – Human Protein Atlas IHC and mRNA Data for 950 non-MS-Based PE1 Proteins
