# Supplementary material
Source: PubMed Central journal article supplement (PMC7718309)
Supplement: NIHMS1644377-supplement-Suppl__Table_2.pdf [file NIHMS1644377-supplement-Suppl__Table_2.pdf]

Description of column headings for ST2 and ST3: A, neXtProt accession code; B, Ensembl Gene number; C, protein name; D, gene name; E, chromosomal location of the gene; then evidence curated by SwissProt/neXtProt: F, Edman degradation sequencing; G, use of textbook knowledge; H, disease mutation; I, 3D structure studies; J, SwissProt protein-protein interactions; K, IntAct protein-protein interactions (Gold); L, post-translational modifications; M, antibody studies; N, functional experiments; O, mutagenesis study; then from Human Protein Atlas (HPA v19): P, Tissue Atlas reliability score (enhanced/supported/approved/uncertain validation categories); Q, consensus RNA expression specificity (from HPA, GTEx, FANTOM5); R, consensus distribution; S, tissue enriched/tissue enhanced. The red highlighted rows are the difference between 950 total neXtProt entries and the 820 for which there is knowledge about which kinds of evidence were reviewed; presumably the other 130 are older results carried forward from UniProt/SwissProt.



Supplementary Table 2: Evidence for the 950 non-MS-based PE1 neXtProt Proteins (ordered by neXtProt accession code, Column A, for 906 with data)

|    | A                         | B                                                    | C                    | D          | E     | F        | G          | H            | I          | J   | K          | L   | M       | N       |              |             |
|----|---------------------------|------------------------------------------------------|----------------------|------------|-------|----------|------------|--------------|------------|-----|------------|-----|---------|---------|--------------|-------------|
| 1  | accession code            | protein name                                         | gene name(s)         | chromosome | Edman | textbook | Disease mu | 3D structure | SP curated | PPI | IntAct PPI | GOL | Exp PTM | Ab info | Exp function | mutagenesis |
| 42 | <a href="#">NX_A8MW95</a> | Beclin-2                                             | BECN2                | 1q43       |       |          |            | yes          | yes        | yes |            | yes | yes     | yes     | yes          |             |
| 43 | <a href="#">NX_P35462</a> | D(3) dopamine receptor                               | DRD3                 | 3q13.31    |       |          |            | yes          | yes        | yes | yes        |     | yes     | yes     | yes          | yes         |
| 44 | <a href="#">NX_Q9UBX2</a> | Double homeobox protein 4                            | DUX4                 | 4q35.2     |       |          |            | yes          | yes        | yes |            | yes | yes     | yes     | yes          | yes         |
| 45 | <a href="#">NX_P43220</a> | Glucagon-like peptide 1 receptor                     | GLP1R                | 6p21.2     |       |          |            | yes          | yes        | yes | yes        | yes | yes     | yes     | yes          | yes         |
| 46 | <a href="#">NX_P0C0S8</a> | Histone H2A type 1                                   | H2AC11, H2AC11       | 6p22.1     |       |          |            | yes          | yes        | yes | yes        | yes | yes     | yes     | yes          | yes         |
| 47 | <a href="#">NX_Q9Y2N7</a> | Hypoxia-inducible factor 3-alpha                     | HIF3A                | 19q13.32   |       |          |            | yes          | yes        | yes |            | yes | yes     | yes     | yes          | yes         |
| 48 | <a href="#">NX_P04908</a> | Histone H2A type 1-B/E                               | HIST1H2AB, HIST1H2AB | 6p22.2     |       |          |            | yes          | yes        | yes | yes        | yes | yes     | yes     | yes          | yes         |
| 49 | <a href="#">NX_P28335</a> | 5-hydroxytryptamine receptor                         | HTR2C                | Xq23       |       |          |            | yes          | yes        | yes | yes        | yes | yes     | yes     | yes          | yes         |
| 50 | <a href="#">NX_Q5VWK5</a> | Interleukin-23 receptor                              | IL23R                | 1p31.3     |       |          |            | yes          | yes        | yes | yes        | yes | yes     | yes     | yes          | yes         |
| 51 | <a href="#">NX_Q9GZQ8</a> | Microtubule-associated protein 1A                    | MAP1LC3B             | 16q24.2    |       |          |            | yes          | yes        | yes | yes        | yes | yes     | yes     | yes          | yes         |
| 52 | <a href="#">NX_Q9H9S0</a> | Homeobox protein NANOG                               | NANOG                | 12p13.31   |       |          |            | yes          | yes        | yes |            | yes | yes     | yes     | yes          | yes         |
| 53 | <a href="#">NX_Q7Z3Z2</a> | Protein RD3                                          | RD3                  | 1q32.3     |       |          |            | yes          | yes        | yes |            | yes | yes     | yes     | yes          | yes         |
| 54 | <a href="#">NX_O15105</a> | Mothers against decapentaplegic 7                    | SMAD7                | 18q21.1    |       |          |            | yes          | yes        | yes | yes        | yes | yes     | yes     | yes          | yes         |
| 55 | <a href="#">NX_G2XKQ0</a> | Small ubiquitin-related modifier 1                   | SUMO1P1              | 20q13.2    |       |          |            | yes          | yes        | yes | yes        | yes | yes     | yes     | yes          | yes         |
| 56 | <a href="#">NX_Q9BZJ8</a> | G-protein coupled receptor 61                        | GPR61                | 1p13.3     |       |          |            |              | yes        | yes | yes        | yes | yes     | yes     | yes          | yes         |
| 57 | <a href="#">NX_Q9H3Y6</a> | Tyrosine-protein kinase Src                          | SRMS                 | 20q13.33   |       |          |            |              | yes        | yes | yes        | yes | yes     | yes     | yes          | yes         |
| 58 | <a href="#">NX_P51671</a> | Eotaxin                                              | CCL11                | 17q12      | yes   |          |            | yes          |            | yes | yes        | yes | yes     | yes     | yes          | yes         |
| 59 | <a href="#">NX_Q99616</a> | C-C motif chemokine 13                               | CCL13                | 17q12      | yes   |          |            | yes          |            | yes | yes        | yes | yes     | yes     | yes          | yes         |
| 60 | <a href="#">NX_Q9Y258</a> | C-C motif chemokine 26                               | CCL26                | 7q11.23    | yes   |          |            | yes          | yes        | yes |            | yes | yes     | yes     | yes          | yes         |
| 61 | <a href="#">NX_O60814</a> | Histone H2B type 1-K                                 | HIST1H2BK            | 6p22.1     | yes   |          |            | yes          | yes        |     | yes        | yes | yes     | yes     | yes          | yes         |
| 62 | <a href="#">NX_Q16778</a> | Histone H2B type 2-E                                 | HIST2H2BE            | 1q21.2     | yes   |          |            | yes          | yes        |     | yes        | yes | yes     | yes     | yes          | yes         |
| 63 | <a href="#">NX_Q13007</a> | Interleukin-24                                       | IL24                 | 1q32.1     | yes   |          |            | yes          |            | yes | yes        | yes | yes     | yes     | yes          | yes         |
| 64 | <a href="#">NX_P05112</a> | Interleukin-4                                        | IL4                  | 5q31.1     | yes   |          |            | yes          |            | yes | yes        | yes | yes     | yes     | yes          | yes         |
| 65 | <a href="#">NX_P04553</a> | Sperm protamine P1                                   | PRM1                 | 16p13.13   | yes   |          |            | yes          | yes        | yes | yes        | yes | yes     | yes     | yes          | yes         |
| 66 | <a href="#">NX_P10265</a> | Endogenous retrovirus group 1                        | ERVK-10              | 5q33.3     | yes   |          |            |              | yes        | yes | yes        | yes | yes     | yes     | yes          | yes         |
| 67 | <a href="#">NX_Q9NWW9</a> | Phospholipase A and acyltransferase 2                | PLAAT2               | 11q12.3    |       | yes      |            | yes          |            |     |            |     | yes     | yes     | yes          | yes         |
| 68 | <a href="#">NX_Q5QJU3</a> | Alkaline ceramidase 2                                | ACER2                | 9p22.1     |       | yes      |            |              |            |     |            | yes | yes     | yes     | yes          | yes         |
| 69 | <a href="#">NX_P47872</a> | Secretin receptor                                    | SCTR                 | 2q14.2     |       | yes      |            |              |            | yes |            | yes | yes     | yes     | yes          | yes         |
| 70 | <a href="#">NX_Q04844</a> | Acetylcholine receptor subunit epsilon               | CHRNE                | 17p13.2    |       |          | yes        | yes          | yes        |     |            |     | yes     | yes     | yes          | yes         |
| 71 | <a href="#">NX_Q43612</a> | Orexin                                               | HCRT                 | 17q21.2    |       |          | yes        | yes          |            |     | yes        |     | yes     | yes     | yes          | yes         |
| 72 | <a href="#">NX_Q9NPC2</a> | Potassium channel subfamily A member 9               | KCNK9                | 8q24.3     |       |          | yes        | yes          | yes        |     |            |     | yes     | yes     | yes          | yes         |
| 73 | <a href="#">NX_P56696</a> | Potassium voltage-gated channel subfamily D member 4 | KCNQ4                | 1p34.2     |       |          | yes        | yes          | yes        |     |            |     | yes     | yes     | yes          | yes         |
| 74 | <a href="#">NX_P22888</a> | Lutropin-choriogonadotropin receptor                 | LHCGR                | 2p16.3     |       |          | yes        | yes          |            |     | yes        |     | yes     | yes     | yes          | yes         |
| 75 | <a href="#">NX_P04000</a> | Long-wave-sensitive opsin 1                          | OPN1LW               | Xq28       |       |          | yes        | yes          |            |     | yes        |     | yes     | yes     | yes          | yes         |
| 76 | <a href="#">NX_Q9UMZ3</a> | Phosphatidylinositol 3-kinase                        | PTPRQ                | 12q21.31   |       |          | yes        | yes          |            |     |            | yes | yes     | yes     | yes          | yes         |
| 77 | <a href="#">NX_Q01726</a> | Melanocyte-stimulating hormone receptor              | MC1R                 | 16q24.3    |       |          | yes        |              | yes        | yes |            |     | yes     | yes     | yes          | yes         |
| 78 | <a href="#">NX_P30301</a> | Lens fiber major intrinsic protein                   | MIP                  | 12q13.3    |       |          | yes        |              | yes        |     | yes        |     | yes     | yes     | yes          | yes         |
| 79 | <a href="#">NX_O15146</a> | Muscle, skeletal receptor tyrosine kinase            | MUSK                 | 9q31.3     |       |          | yes        |              |            | yes | yes        |     | yes     | yes     | yes          | yes         |
| 80 | <a href="#">NX_Q9Y3D7</a> | Mitochondrial import inner membrane 16               | PAM16                | 16p13.3    |       |          | yes        |              | yes        | yes |            |     | yes     | yes     | yes          | yes         |
| 81 | <a href="#">NX_Q8HWS3</a> | DNA-binding protein RFX6                             | RFX6                 | 6q22.1     |       |          | yes        |              |            | yes |            | yes | yes     | yes     | yes          | yes         |

Supplementary Table 2: Evidence for the 950 non-MS-based PE1 neXtProt Proteins (ordered by neXtProt accession code, Column A, for 906 with data)

|     | A                         | B                                | C               | D          | E     | F        | G          | H            | I          | J   | K          | L   | M       | N       |              |             |
|-----|---------------------------|----------------------------------|-----------------|------------|-------|----------|------------|--------------|------------|-----|------------|-----|---------|---------|--------------|-------------|
| 1   | accession code            | protein name                     | gene name(s)    | chromosome | Edman | textbook | Disease mu | 3D structure | SP curated | PPI | IntAct PPI | GOL | Exp PTM | Ab info | Exp function | mutagenesis |
| 82  | <a href="#">NX_Q12908</a> | Ileal sodium/bile acid cotran    | SLC10A2         | 13q33.1    |       |          | yes        |              | yes        |     |            |     | yes     |         | yes          | yes         |
| 83  | <a href="#">NX_P82251</a> | b(0,+)-type amino acid trans     | SLC7A9          | 19q13.11   |       |          | yes        |              |            |     | yes        |     |         | yes     | yes          | yes         |
| 84  | <a href="#">NX_P29371</a> | Neuromedin-K receptor            | TACR3           | 4q24       |       |          | yes        |              |            |     | yes        |     | yes     |         | yes          | yes         |
| 85  | <a href="#">NX_P46597</a> | Acetylserotonin O-methyltra      | ASMT            | Xp22.33    |       |          |            | yes          | yes        |     |            |     |         | yes     | yes          | yes         |
| 86  | <a href="#">NX_P13236</a> | C-C motif chemokine 4            | CCL4            | 17q12      |       |          |            | yes          | yes        |     |            |     | yes     |         | yes          | yes         |
| 87  | <a href="#">NX_P36544</a> | Neuronal acetylcholine rece      | CHRNA7          | 15q13.3    |       |          |            | yes          | yes        |     |            |     |         |         | yes          | yes         |
| 88  | <a href="#">NX_Q6UVW9</a> | C-type lectin domain family      | CLEC2A          | 12p13.31   |       |          |            | yes          | yes        |     |            | yes |         |         | yes          | yes         |
| 89  | <a href="#">NX_Q9UJW3</a> | DNA (cytosine-5)-methyltra       | DNMT3L          | 21q22.3    |       |          |            | yes          | yes        |     |            |     | yes     |         | yes          | yes         |
| 90  | <a href="#">NX_Q6B811</a> | Dual specificity protein phos    | DUSP13          | 10q22.2    |       |          |            | yes          | yes        |     |            |     |         |         | yes          | yes         |
| 91  | <a href="#">NX_O95257</a> | Growth arrest and DNA dam        | GADD45G         | 9q22.2     |       |          |            | yes          | yes        |     | yes        |     |         |         | yes          | yes         |
| 92  | <a href="#">NX_P48546</a> | Gastric inhibitory polypeptid    | GIPR            | 19q13.32   |       |          |            | yes          | yes        |     |            | yes |         |         | yes          | yes         |
| 93  | <a href="#">NX_Q93077</a> | Histone H2A type 1-C             | HIST1H2AC       | 6p22.2     |       |          |            | yes          | yes        |     |            |     | yes     |         | yes          | yes         |
| 94  | <a href="#">NX_P20671</a> | Histone H2A type 1-D             | HIST1H2AD       | 6p22.2     |       |          |            | yes          | yes        |     |            |     | yes     |         | yes          | yes         |
| 95  | <a href="#">NX_Q6F113</a> | Histone H2A type 2-A             | HIST2H2AA3, HIK | 1q21.2     |       |          |            | yes          | yes        |     |            |     | yes     |         | yes          | yes         |
| 96  | <a href="#">NX_P41595</a> | 5-hydroxytryptamine recept       | HTR2B           | 2q37.1     |       |          |            | yes          | yes        |     | yes        |     |         |         | yes          | yes         |
| 97  | <a href="#">NX_O95256</a> | Interleukin-18 receptor acce     | IL18RAP         | 2q12.1     |       |          |            | yes          | yes        |     |            | yes |         |         | yes          | yes         |
| 98  | <a href="#">NX_Q9Y691</a> | Calcium-activated potassium      | KCNMB2          | 3q26.32    |       |          |            | yes          | yes        |     |            |     | yes     |         | yes          | yes         |
| 99  | <a href="#">NX_D3W0D1</a> | Killer cell lectin-like receptor | KLRF2           | 12p13.31   |       |          |            | yes          | yes        |     |            |     | yes     |         | yes          | yes         |
| 100 | <a href="#">NX_Q96A72</a> | Protein mago nashi homolog       | MAGOHB          | 12p13.2    |       |          |            | yes          | yes        |     | yes        |     | yes     |         | yes          | yes         |
| 101 | <a href="#">NX_Q8IVG9</a> | Humanin                          | MT-RNR2         | MT         |       |          |            | yes          | yes        |     |            |     |         |         | yes          | yes         |
| 102 | <a href="#">NX_Q13765</a> | Nascent polypeptide-associ       | NACA            | 12q13.3    |       |          |            | yes          | yes        |     |            |     | yes     |         | yes          | yes         |
| 103 | <a href="#">NX_P41146</a> | Nociceptin receptor              | OPRL1           | 20q13.33   |       |          |            | yes          | yes        |     |            |     | yes     |         | yes          | yes         |
| 104 | <a href="#">NX_Q9NR21</a> | Protein mono-ADP-ribosyltra      | PARP11          | 12p13.32   |       |          |            | yes          |            |     | yes        |     |         |         | yes          | yes         |
| 105 | <a href="#">NX_Q96LB9</a> | Peptidoglycan recognition pr     | PGLYRP3         | 1q21.3     |       |          |            | yes          | yes        |     |            |     | yes     | yes     | yes          | yes         |
| 106 | <a href="#">NX_Q9NQV7</a> | Histone-lysine N-methyltra       | PRDM9           | 5p14.2     |       |          |            | yes          | yes        |     |            |     |         |         | yes          | yes         |
| 107 | <a href="#">NX_P0CG48</a> | Polyubiquitin-C                  | UBC             | 12q24.31   |       |          |            | yes          |            |     | yes        |     | yes     |         | yes          | yes         |
| 108 | <a href="#">NX_P55089</a> | Urocortin                        | UCN             | 2p23.3     |       |          |            | yes          | yes        |     |            |     |         | yes     | yes          | yes         |
| 109 | <a href="#">NX_Q00254</a> | Proteinase-activated recept      | F2RL2           | 5q13.3     |       |          |            |              | yes        |     | yes        |     | yes     |         | yes          | yes         |
| 110 | <a href="#">NX_Q99527</a> | G-protein coupled estrogen       | GPER1           | 7p22.3     |       |          |            |              | yes        |     |            |     | yes     | yes     | yes          | yes         |
| 111 | <a href="#">NX_Q7L7L0</a> | Histone H2A type 3               | HIST3H2A        | 1q42.13    |       |          |            |              | yes        |     | yes        |     | yes     |         | yes          | yes         |
| 112 | <a href="#">NX_Q0VD86</a> | Protein INCA1                    | INCA1           | 17p13.2    |       |          |            |              | yes        |     | yes        |     | yes     |         | yes          | yes         |
| 113 | <a href="#">NX_P14616</a> | Insulin receptor-related prot    | INSRR           | 1q23.1     |       |          |            |              | yes        |     | yes        |     | yes     |         | yes          | yes         |
| 114 | <a href="#">NX_Q14953</a> | Killer cell immunoglobulin-lik   | KIR2DS5         | 19         |       |          |            |              | yes        |     | yes        |     | yes     |         | yes          | yes         |
| 115 | <a href="#">NX_Q96D59</a> | E3 ubiquitin-protein ligase R    | RNF183          | 9q32       |       |          |            |              | yes        |     | yes        |     | yes     |         | yes          | yes         |
| 116 | <a href="#">NX_Q8NER1</a> | Transient receptor potential     | TRPV1           | 17p13.2    |       |          |            |              | yes        |     | yes        |     |         | yes     | yes          | yes         |
| 117 | <a href="#">NX_P35125</a> | Ubiquitin carboxyl-terminal t    | USP6            | 17p13.2    |       |          |            |              | yes        |     | yes        |     | yes     |         | yes          | yes         |
| 118 | <a href="#">NX_A8K0Z3</a> | WASH complex subunit 1           | WASHC1          | 9p24.3     |       |          |            |              | yes        |     | yes        |     | yes     |         | yes          | yes         |
| 119 | <a href="#">NX_P0CG04</a> | Immunoglobulin lambda con        | IGLC1           | 22q11.22   | yes   | yes      |            | yes          |            |     |            |     | yes     |         |              |             |
| 120 | <a href="#">NX_Q99217</a> | Amelogenin, X isoform            | AMELX           | Xp22.2     | yes   |          | yes        |              |            |     |            |     | yes     |         | yes          |             |
| 121 | <a href="#">NX_P55344</a> | Lens fiber membrane intrins      | LIM2            | 19q13.41   | yes   |          | yes        |              | yes        |     |            |     |         |         | yes          |             |

Supplementary Table 2: Evidence for the 950 non-MS-based PE1 neXtProt Proteins (ordered by neXtProt accession code, Column A, for 906 with data)

|     | A                             | B                              | C              | D          | E     | F        | G          | H            | I          | J   | K          | L   | M       | N       |              |             |
|-----|-------------------------------|--------------------------------|----------------|------------|-------|----------|------------|--------------|------------|-----|------------|-----|---------|---------|--------------|-------------|
| 1   | accession code                | protein name                   | gene name(s)   | chromosome | Edman | textbook | Disease mu | 3D structure | SP curated | PPI | IntAct PPI | GOL | Exp PTM | Ab info | Exp function | mutagenesis |
| 122 | <a href="#">NX_Q3MUJ2</a>     | Phosphatidylinositol N-acety   | PIGY           | 4q22.1     | yes   | yes      |            |              | yes        |     |            |     |         |         | yes          |             |
| 123 | <a href="#">NX_Q9HC23</a>     | Prokineticin-2                 | PROK2          | 3p13       | yes   | yes      |            |              |            |     |            |     |         |         | yes          | yes         |
| 124 | <a href="#">NX_P0DN86</a>     | Choriogonadotropin subunit     | CGB3, CGB5, CG | 19q13.33   | yes   |          |            | yes          | yes        |     |            | yes |         |         |              |             |
| 125 | <a href="#">NX_P01286</a>     | Somatoliberin                  | GHRH           | 20q11.23   | yes   |          |            | yes          |            |     |            | yes |         |         | yes          |             |
| 126 | <a href="#">NX_Q6UXL0</a>     | Interleukin-20 receptor subu   | IL20RB         | 3q22.3     | yes   |          |            | yes          | yes        |     |            |     |         |         | yes          |             |
| 127 | <a href="#">NX_Q9Y5K2</a>     | Kallikrein-4                   | KLK4           | 19q13.41   | yes   |          |            | yes          |            | yes |            |     |         |         | yes          |             |
| 128 | <a href="#">NX_Q8WVG8</a>     | Protein S100-Z                 | S100Z          | 5q13.3     | yes   |          |            | yes          | yes        |     |            |     |         |         |              |             |
| 129 | <a href="#">NX_Q6UX39</a>     | Amelotin                       | AMTN           | 4q13.3     | yes   |          |            |              |            | yes |            | yes |         |         | yes          |             |
| 130 | <a href="#">NX_P0DML3</a>     | Chorionic somatomammotroc      | CSH2           | 17q23.3    | yes   |          |            |              | yes        |     |            | yes |         |         | yes          |             |
| 131 | <a href="#">NX_Q93079</a>     | Histone H2B type 1-H           | HIST1H2BH      | 6p22.2     | yes   |          |            |              | yes        |     |            | yes |         |         | yes          |             |
| 132 | <a href="#">NX_P23527</a>     | Histone H2B type 1-O           | HIST1H2BO      | 6p22.1     | yes   |          |            |              | yes        |     |            | yes |         |         | yes          |             |
| 133 | <a href="#">NX_Q97980</a>     | Minor histocompatibility prot  | HMHB1          | 5q31.3     | yes   |          |            |              | yes        |     |            |     |         |         | yes          | yes         |
| 134 | <a href="#">NX_Q5DT21</a>     | Serine protease inhibitor Ka:  | SPINK9         | 5q32       | yes   |          |            |              | yes        |     |            |     |         | yes     | yes          |             |
| 135 | <a href="#">NX_A0A0K0K1A5</a> | T cell receptor beta variable  | TRBV6-5        | 7q34       |       | yes      |            | yes          | yes        |     |            |     |         |         | yes          |             |
| 136 | <a href="#">NX_Q9NWF4</a>     | Solute carrier family 52, ribo | SLC52A1        | 17p13.2    |       | yes      |            |              |            |     |            |     |         |         | yes          | yes         |
| 137 | <a href="#">NX_Q15822</a>     | Neuronal acetylcholine recej   | CHRNA2         | 8p21.2     |       |          |            |              |            | yes |            |     |         |         | yes          | yes         |
| 138 | <a href="#">NX_P55075</a>     | Fibroblast growth factor 8     | FGF8           | 10q24.32   |       |          |            | yes          | yes        | yes |            |     |         |         | yes          |             |
| 139 | <a href="#">NX_P14653</a>     | Homeobox protein Hox-B1        | HOXB1          | 17q21.32   |       |          |            | yes          | yes        |     |            |     |         |         | yes          | yes         |
| 140 | <a href="#">NX_Q99748</a>     | Neurturin                      | NRTN           | 19p13.3    |       |          |            | yes          | yes        | yes |            |     |         |         | yes          |             |
| 141 | <a href="#">NX_Q9H4Q4</a>     | PR domain zinc finger protei   | PRDM12         | 9q34.12    |       |          |            | yes          | yes        |     |            |     |         |         | yes          | yes         |
| 142 | <a href="#">NX_Q8WXD0</a>     | Relaxin receptor 2             | RXFP2          | 13q13.1    |       |          |            | yes          | yes        |     |            |     |         |         | yes          | yes         |
| 143 | <a href="#">NX_Q9H324</a>     | A disintegrin and metallopro   | ADAMTS10       | 19p13.2    |       |          |            | yes          |            | yes |            |     |         |         | yes          | yes         |
| 144 | <a href="#">NX_Q7RTU4</a>     | Class A basic helix-loop-heli  | BHLHA9         | 17p13.3    |       |          |            | yes          |            | yes |            |     |         |         | yes          | yes         |
| 145 | <a href="#">NX_Q2WEN9</a>     | Carcinoembryonic antigen-r     | CEACAM16       | 19q13.31   |       |          |            | yes          | yes        |     |            |     |         |         | yes          | yes         |
| 146 | <a href="#">NX_P0CG37</a>     | Cryptic protein                | CFC1           | 2q21.1     |       |          |            | yes          |            |     |            | yes |         |         | yes          | yes         |
| 147 | <a href="#">NX_P11230</a>     | Acetylcholine receptor subu    | CHRNA1         | 17p13.1    |       |          |            | yes          |            | yes |            |     |         |         | yes          | yes         |
| 148 | <a href="#">NX_Q07001</a>     | Acetylcholine receptor subu    | CHRND          | 2q37.1     |       |          |            | yes          |            | yes |            |     |         |         | yes          | yes         |
| 149 | <a href="#">NX_P07510</a>     | Acetylcholine receptor subu    | CHRNG          | 2q37.1     |       |          |            | yes          |            | yes |            |     |         |         | yes          |             |
| 150 | <a href="#">NX_Q75838</a>     | Calcium and integrin-binding   | CIB2           | 15q25.1    |       |          |            | yes          |            | yes |            |     |         |         | yes          | yes         |
| 151 | <a href="#">NX_P0DP91</a>     | Chimeric ERCC6-PGBD3 pr        | ERCC6          | 10q11.23   |       |          |            | yes          |            |     |            |     |         | yes     | yes          | yes         |
| 152 | <a href="#">NX_Q92915</a>     | Fibroblast growth factor 14    | FGF14          | 13q33.1    |       |          |            | yes          |            | yes |            |     |         |         | yes          |             |
| 153 | <a href="#">NX_Q6ZUT3</a>     | FERM domain-containing pr      | FRMD7          | Xq26.2     |       |          |            | yes          |            |     |            |     |         |         | yes          | yes         |
| 154 | <a href="#">NX_Q75603</a>     | Chorion-specific transcriptio  | GCM2           | 6p24.2     |       |          |            | yes          |            |     |            |     |         |         | yes          | yes         |
| 155 | <a href="#">NX_Q92847</a>     | Growth hormone secretagoç      | GHSR           | 3q26.31    |       |          |            | yes          |            |     |            |     |         |         | yes          | yes         |
| 156 | <a href="#">NX_Q14626</a>     | Interleukin-11 receptor subu   | IL11RA         | 9p13.3     |       |          |            | yes          |            | yes |            |     |         |         | yes          | yes         |
| 157 | <a href="#">NX_C9JR72</a>     | Kelch repeat and BTB doma      | KBTBD13        | 15q22.31   |       |          |            | yes          |            | yes |            |     | yes     |         | yes          |             |
| 158 | <a href="#">NX_B7U540</a>     | Inward rectifier potassium c   | KCNJ18         | 17p11.2    |       |          |            | yes          |            |     |            |     | yes     |         | yes          | yes         |
| 159 | <a href="#">NX_Q01718</a>     | Adrenocorticotropic hormon     | MC2R           | 18p11.21   |       |          |            | yes          |            | yes |            |     |         |         | yes          |             |
| 160 | <a href="#">NX_P13349</a>     | Myogenic factor 5              | MYF5           | 12q21.31   |       |          |            | yes          |            | yes |            |     |         |         | yes          | yes         |
| 161 | <a href="#">NX_Q00LT1</a>     | Photoreceptor disk compone     | PRCD           | 17q25.1    |       |          |            | yes          |            |     |            |     | yes     |         | yes          | yes         |

Supplementary Table 2: Evidence for the 950 non-MS-based PE1 neXtProt Proteins (ordered by neXtProt accession code, Column A, for 906 with data)

|     | A                         | B                                | C              | D            | E     | F        | G          | H            | I          | J   | K          | L   | M       | N       |              |             |
|-----|---------------------------|----------------------------------|----------------|--------------|-------|----------|------------|--------------|------------|-----|------------|-----|---------|---------|--------------|-------------|
| 1   | accession code            | protein name                     | gene name(s)   | chromosome   | Edman | textbook | Disease mu | 3D structure | SP curated | PPI | IntAct PPI | GOL | Exp PTM | Ab info | Exp function | mutagenesis |
| 162 | <a href="#">NX_Q8NFJ6</a> | Prokineticin receptor 2          | PROKR2         | 20p12.3      |       |          | yes        |              | yes        |     |            |     |         | yes     | yes          |             |
| 163 | <a href="#">NX_O75360</a> | Homeobox protein prophet c       | PROP1          | 5q35.3       |       |          | yes        |              |            | yes |            |     |         | yes     | yes          |             |
| 164 | <a href="#">NX_Q13702</a> | 43 kDa receptor-associated       | RAPSN          | 11p11.2      |       |          | yes        |              |            |     |            | yes |         | yes     | yes          |             |
| 165 | <a href="#">NX_Q2I0M5</a> | R-spondin-4                      | RSPO4          | 20p13        |       |          | yes        |              | yes        |     |            | yes |         | yes     | yes          |             |
| 166 | <a href="#">NX_Q9Y5Y9</a> | Sodium channel protein type      | SCN10A         | 3p22.2       |       |          | yes        |              |            | yes |            |     |         | yes     | yes          |             |
| 167 | <a href="#">NX_Q9UI33</a> | Sodium channel protein type      | SCN11A         | 3p22.2       |       |          | yes        |              | yes        |     |            |     |         | yes     | yes          |             |
| 168 | <a href="#">NX_P0DPK2</a> | Histone H3.Y                     |                | 5p15.1       |       |          |            | yes          | yes        |     |            |     |         | yes     | yes          |             |
| 169 | <a href="#">NX_P50052</a> | Type-2 angiotensin II recept     | AGTR2          | Xq23         |       |          |            | yes          | yes        |     | yes        |     |         | yes     | yes          |             |
| 170 | <a href="#">NX_Q5T4W7</a> | Artemin                          | ARTN           | 1p34.1       |       |          |            | yes          |            | yes |            | yes |         | yes     | yes          |             |
| 171 | <a href="#">NX_Q8IX05</a> | CD302 antigen                    | CD302          | 2q24.2       |       |          |            | yes          |            |     |            | yes | yes     | yes     | yes          |             |
| 172 | <a href="#">NX_Q9Y6F8</a> | Testis-specific chromodoma       | CDY1, CDY1B    | Yq11.23      |       |          |            | yes          | yes        |     |            |     |         | yes     | yes          |             |
| 173 | <a href="#">NX_P26441</a> | Ciliary neurotrophic factor      | CNTF           | 11q12.1      |       |          |            | yes          | yes        | yes |            |     |         | yes     | yes          |             |
| 174 | <a href="#">NX_Q13324</a> | Corticotropin-releasing facto    | CRHR2          | 7p14.3       |       |          |            | yes          | yes        | yes |            |     |         | yes     | yes          |             |
| 175 | <a href="#">NX_Q8TE69</a> | Protein CXorf40A                 | CXorf40A       | Xq28         |       |          |            | yes          | yes        | yes |            |     |         | yes     | yes          |             |
| 176 | <a href="#">NX_P31995</a> | Low affinity immunoglobulin      | FCGR2C         | 1q23.3       |       |          |            | yes          |            | yes |            | yes |         | yes     | yes          |             |
| 177 | <a href="#">NX_Q6UXV0</a> | GDNF family receptor alpha       | GFRAL          | 6p12.1       |       |          |            | yes          | yes        |     |            |     | yes     | yes     | yes          |             |
| 178 | <a href="#">NX_O75311</a> | Glycine receptor subunit alp     | GLRA3          | 4q34.1       |       |          |            | yes          | yes        |     |            | yes |         | yes     | yes          |             |
| 179 | <a href="#">NX_P0C5Z0</a> | Histone H2A-Bbd type 2/3         | H2AFB2, H2AFB3 | Xq28         |       |          |            | yes          | yes        | yes |            |     |         | yes     | yes          |             |
| 180 | <a href="#">NX_Q43613</a> | Orexin receptor type 1           | HCRTR1         | 1p35.2       |       |          |            | yes          |            | yes |            |     |         | yes     | yes          | yes         |
| 181 | <a href="#">NX_P33778</a> | Histone H2B type 1-B             | HIST1H2BB      | 6p22.2       |       |          |            | yes          | yes        |     |            | yes |         | yes     | yes          |             |
| 182 | <a href="#">NX_O00198</a> | Activator of apoptosis haraki    | HRK            | 12q24.22     |       |          |            | yes          | yes        | yes |            |     |         | yes     | yes          |             |
| 183 | <a href="#">NX_Q13639</a> | 5-hydroxytryptamine receptc      | HTR4           | 5q32         |       |          |            | yes          | yes        | yes |            |     |         | yes     | yes          |             |
| 184 | <a href="#">NX_Q8IU57</a> | Interferon lambda receptor 1     | IFNLR1         | 1p36.11      |       |          |            | yes          | yes        |     |            | yes |         | yes     | yes          |             |
| 185 | <a href="#">NX_P43628</a> | Killer cell immunoglobulin-lik   | KIR2DL3        | 19q13.42     |       |          |            | yes          | yes        | yes |            |     |         | yes     | yes          |             |
| 186 | <a href="#">NX_P43632</a> | Killer cell immunoglobulin-lik   | KIR2DS4        | 19, 19q13.42 |       |          |            | yes          | yes        | yes |            |     |         | yes     | yes          |             |
| 187 | <a href="#">NX_P26717</a> | NKG2-C type II integral men      | KLRC2          | 12p13.2      |       |          |            | yes          | yes        |     |            |     |         | yes     | yes          | yes         |
| 188 | <a href="#">NX_P49286</a> | Melatonin receptor type 1B       | MTNR1B         | 11q14.3      |       |          |            | yes          | yes        | yes |            |     |         | yes     | yes          |             |
| 189 | <a href="#">NX_P59046</a> | NACHT, LRR and PYD dom           | NLRP12         | 19q13.42     |       |          |            | yes          | yes        | yes |            |     |         | yes     | yes          |             |
| 190 | <a href="#">NX_P34130</a> | Neurotrophin-4                   | NTF4           | 19q13.33     |       |          |            | yes          |            | yes |            |     |         | yes     | yes          | yes         |
| 191 | <a href="#">NX_P51582</a> | P2Y purinoceptor 4               | P2RY4          | Xq13.1       |       |          |            | yes          |            |     |            | yes |         | yes     | yes          | yes         |
| 192 | <a href="#">NX_Q5VY80</a> | UL16-binding protein 6           | RAET1L         | 6q25.1       |       |          |            | yes          | yes        | yes |            |     |         | yes     | yes          |             |
| 193 | <a href="#">NX_P0DJD3</a> | RNA-binding motif protein, Y     | RBM1A1         | Yq11.223     |       |          |            | yes          | yes        | yes |            |     |         | yes     | yes          |             |
| 194 | <a href="#">NX_Q6ZSG1</a> | E3 ubiquitin-protein ligase R    | RNF165         | 18q21.1      |       |          |            | yes          | yes        | yes |            |     |         |         | yes          | yes         |
| 195 | <a href="#">NX_Q6PXP3</a> | Solute carrier family 2, facilit | SLC2A7         | 1p36.23      |       |          |            | yes          |            |     |            |     |         |         | yes          | yes         |
| 196 | <a href="#">NX_P0DP57</a> | Secreted Ly-6/uPAR domair        | SLURP2         | 8q24.3       |       |          |            | yes          | yes        |     |            |     |         | yes     | yes          |             |
| 197 | <a href="#">NX_Q5MJ70</a> | Speedy protein A                 | SPDYA          | 2p23.2       |       |          |            | yes          | yes        |     |            |     |         |         | yes          | yes         |
| 198 | <a href="#">NX_Q96A44</a> | SPRY domain-containing SC        | SPSB4          | 3q23         |       |          |            | yes          | yes        | yes |            |     |         | yes     | yes          |             |
| 199 | <a href="#">NX_Q5VVX9</a> | Ubiquitin-conjugating enzym      | UBE2U          | 1p31.3       |       |          |            | yes          |            | yes |            | yes |         | yes     | yes          |             |
| 200 | <a href="#">NX_O95045</a> | Uridine phosphorylase 2          | UPP2           | 2q24.1       |       |          |            | yes          |            | yes |            | yes |         | yes     | yes          |             |
| 201 | <a href="#">NX_Q8IU99</a> | Calcium homeostasis modul        | CALHM1         | 10q24.33     |       |          |            |              | yes        |     |            | yes |         | yes     | yes          | yes         |

Supplementary Table 2: Evidence for the 950 non-MS-based PE1 neXtProt Proteins (ordered by neXtProt accession code, Column A, for 906 with data)

|     | A                             | B                                                        | C                  | D          | E     | F        | G       | H   | I            | J          | K   | L      | M   | N   |     |     |         |              |             |
|-----|-------------------------------|----------------------------------------------------------|--------------------|------------|-------|----------|---------|-----|--------------|------------|-----|--------|-----|-----|-----|-----|---------|--------------|-------------|
| 1   | accession code                | protein name                                             | gene name(s)       | chromosome | Edman | textbook | Disease | mu  | 3D structure | SP curated | PPI | IntAct | PPI | GOL | Exp | PTM | Ab info | Exp function | mutagenesis |
| 202 | <a href="#">NX_Q6UXZ3</a>     | CMRF35-like molecule 5                                   | CD300LD            | 17q25.1    |       |          |         |     |              | yes        |     | yes    |     | yes |     |     |         | yes          |             |
| 203 | <a href="#">NX_A5D8T8</a>     | C-type lectin domain family 1                            | CLEC18A            | 16q22.1    |       |          |         |     |              |            |     | yes    |     | yes |     |     |         | yes          | yes         |
| 204 | <a href="#">NX_Q9NQZ3</a>     | Deleted in azoospermia protein 1                         | DAZ1               | Yq11.223   |       |          |         |     |              | yes        |     | yes    |     |     |     |     | yes     | yes          |             |
| 205 | <a href="#">NX_Q6RFH8</a>     | Double homeobox protein 4                                | DUX4L9             | 4q35.2     |       |          |         |     |              | yes        |     | yes    |     |     |     |     | yes     | yes          |             |
| 206 | <a href="#">NX_A1L3X0</a>     | Elongation of very long chain fatty acid synthase 1      | ELOVL7             | 5q12.1     |       |          |         |     |              |            |     | yes    |     |     |     |     |         | yes          | yes         |
| 207 | <a href="#">NX_Q5TYM5</a>     | Protein FAM72A                                           | FAM72A             | 1q32.1     |       |          |         |     |              | yes        |     | yes    |     |     |     |     |         | yes          | yes         |
| 208 | <a href="#">NX_Q9NQR9</a>     | Glucose-6-phosphatase 2                                  | G6PC2              | 2q31.1     |       |          |         |     |              |            |     |        |     | yes |     |     | yes     | yes          | yes         |
| 209 | <a href="#">NX_Q86YW7</a>     | Glycoprotein hormone beta subunit                        | GPHB5              | 14q23.2    |       |          |         |     |              | yes        |     | yes    |     | yes |     |     |         | yes          | yes         |
| 210 | <a href="#">NX_Q5T6X5</a>     | G-protein coupled receptor family C class 6 member A     | GPRC6A             | 6q22.1     |       |          |         |     |              | yes        |     |        |     | yes |     |     |         | yes          | yes         |
| 211 | <a href="#">NX_P54257</a>     | Huntingtin-associated protein 1                          | HAP1               | 17q21.2    |       |          |         |     |              | yes        |     | yes    |     |     |     |     |         | yes          | yes         |
| 212 | <a href="#">NX_Q9UBK5</a>     | Hematopoietic cell signal transduction protein 1         | HCST               | 19q13.12   |       |          |         |     |              | yes        |     |        |     | yes |     |     |         | yes          | yes         |
| 213 | <a href="#">NX_Q96KK5</a>     | Histone H2A type 1-H                                     | HIST1H2AH          | 6p22.1     |       |          |         |     |              | yes        |     |        |     | yes |     |     |         | yes          | yes         |
| 214 | <a href="#">NX_P46098</a>     | 5-hydroxytryptamine receptor 3A                          | HTR3A              | 11q23.2    |       |          |         |     |              | yes        |     | yes    |     |     |     |     |         | yes          | yes         |
| 215 | <a href="#">NX_Q95264</a>     | 5-hydroxytryptamine receptor 3B                          | HTR3B              | 11q23.2    |       |          |         |     |              | yes        |     |        |     | yes |     |     |         | yes          | yes         |
| 216 | <a href="#">NX_Q99665</a>     | Interleukin-12 receptor subunit beta                     | IL12RB2            | 1p31.3     |       |          |         |     |              | yes        |     |        |     | yes |     |     |         | yes          | yes         |
| 217 | <a href="#">NX_Q7Z3S9</a>     | Notch homolog 2 N-terminal domain                        | NOTCH2NLA          | 1q21.1     |       |          |         |     |              | yes        |     | yes    |     | yes |     |     |         | yes          | yes         |
| 218 | <a href="#">NX_P49683</a>     | Prolactin-releasing peptide receptor                     | PRLHR              | 10q26.11   |       |          |         |     |              | yes        |     | yes    |     |     |     |     |         | yes          | yes         |
| 219 | <a href="#">NX_Q9H0N0</a>     | Ras-related protein Rab-6C                               | RAB6C              | 2q21.1     |       |          |         |     |              |            |     |        |     | yes |     |     | yes     | yes          | yes         |
| 220 | <a href="#">NX_Q9NXI6</a>     | E3 ubiquitin-protein ligase RNF186                       | RNF186             | 1p36.13    |       |          |         |     |              | yes        |     |        |     | yes |     |     |         | yes          | yes         |
| 221 | <a href="#">NX_Q9NQW1</a>     | Protein transport protein Sec                            | SEC31B             | 10q24.31   |       |          |         |     |              | yes        |     |        |     | yes |     |     | yes     | yes          |             |
| 222 | <a href="#">NX_Q86XT4</a>     | E3 ubiquitin-protein ligase TRIM50                       | TRIM50             | 7q11.23    |       |          |         |     |              | yes        |     | yes    |     | yes |     |     |         | yes          |             |
| 223 | <a href="#">NX_Q6R6M4</a>     | Ubiquitin carboxyl-terminal hydrolase 17L2               | USP17L2            | 8p23.1     |       |          |         |     |              | yes        |     |        |     |     |     |     | yes     | yes          | yes         |
| 224 | <a href="#">NX_Q6RSH7</a>     | von Hippel-Lindau-like protein                           | VHLL               | 1q22       |       |          |         |     |              | yes        |     | yes    |     |     |     |     |         | yes          | yes         |
| 225 | <a href="#">NX_Q8N895</a>     | Zinc finger protein 366                                  | ZNF366             | 5q13.2     |       |          |         |     |              | yes        |     | yes    |     |     |     |     |         | yes          | yes         |
| 226 | <a href="#">NX_P01768</a>     | Immunoglobulin heavy variable 3-30                       | IGHV3-30           | 14q32.33   | yes   | yes      |         |     |              |            |     |        |     | yes |     |     |         |              |             |
| 227 | <a href="#">NX_P81534</a>     | Beta-defensin 103                                        | DEFB103A, DEFB103B | 8p23.1     | yes   |          |         |     | yes          |            |     |        |     |     |     |     |         | yes          |             |
| 228 | <a href="#">NX_Q969J5</a>     | Interleukin-22 receptor subunit alpha                    | IL22RA2            | 6q23.3     | yes   |          |         |     | yes          |            |     |        |     |     |     |     |         | yes          |             |
| 229 | <a href="#">NX_P0DJJ7</a>     | Pepsin A-4                                               | PGA4               | 11q12.2    | yes   |          |         |     | yes          |            |     |        |     |     |     |     |         | yes          |             |
| 230 | <a href="#">NX_Q95399</a>     | Urotensin-2                                              | UTS2               | 1p36.23    | yes   |          |         |     | yes          |            |     |        |     |     |     |     |         | yes          |             |
| 231 | <a href="#">NX_P31358</a>     | CAMPATH-1 antigen                                        | CD52               | 1p36.11    | yes   |          |         |     |              |            |     |        |     | yes |     |     |         | yes          |             |
| 232 | <a href="#">NX_Q6ZSA7</a>     | Leucine-rich repeat-containing protein 55                | LRR55              | 11q12.1    | yes   |          |         |     |              | yes        |     |        |     |     |     |     |         | yes          |             |
| 233 | <a href="#">NX_P58294</a>     | Prokineticin-1                                           | PROK1              | 1p13.3     | yes   |          |         |     |              |            |     |        |     |     |     |     | yes     | yes          |             |
| 234 | <a href="#">NX_P60153</a>     | Inactive ribonuclease-like protein                       | RNASE9             | 14q11.2    | yes   |          |         |     |              |            |     |        |     |     |     |     | yes     | yes          |             |
| 235 | <a href="#">NX_A0A087WT01</a> | T cell receptor alpha variable region 27                 | TRAV27             | 14q11.2    |       | yes      |         | yes |              | yes        |     |        |     |     |     |     |         |              |             |
| 236 | <a href="#">NX_Q8TDN7</a>     | Alkaline ceramidase 1                                    | ACER1              | 19p13.3    |       | yes      |         |     |              |            |     |        |     |     |     |     |         | yes          |             |
| 237 | <a href="#">NX_Q9Y471</a>     | Inactive cytidine monophosphate-dependent protein kinase | CMAHP              | 6p22.2     |       | yes      |         |     |              |            |     |        |     |     |     |     | yes     | yes          |             |
| 238 | <a href="#">NX_Q6TCH4</a>     | Membrane progesterin receptor 6                          | PAQR6              | 1q22       |       | yes      |         |     |              | yes        |     |        |     |     |     |     |         | yes          |             |
| 239 | <a href="#">NX_Q02643</a>     | Growth hormone-releasing hormone receptor                | GHRHR              | 7p14.3     |       |          | yes     | yes |              |            |     |        |     |     |     |     |         | yes          |             |
| 240 | <a href="#">NX_Q16671</a>     | Anti-Muellerian hormone type 2 receptor                  | AMHR2              | 12q13.13   |       |          | yes     |     |              |            |     | yes    |     |     |     |     |         | yes          |             |
| 241 | <a href="#">NX_Q9NPB3</a>     | Calcium-binding protein 2                                | CABP2              | 11q13.2    |       |          | yes     |     |              |            |     |        |     | yes |     |     |         | yes          |             |

Supplementary Table 2: Evidence for the 950 non-MS-based PE1 neXtProt Proteins (ordered by neXtProt accession code, Column A, for 906 with data)

|     | A                         | B                                             | C                  | D          | E     | F        | G          | H            | I              | J          | K   | L       | M       | N            |             |
|-----|---------------------------|-----------------------------------------------|--------------------|------------|-------|----------|------------|--------------|----------------|------------|-----|---------|---------|--------------|-------------|
| 1   | accession code            | protein name                                  | gene name(s)       | chromosome | Edman | textbook | Disease mu | 3D structure | SP curated PPI | IntAct PPI | GOL | Exp PTM | Ab info | Exp function | mutagenesis |
| 242 | <a href="#">NX_P58418</a> | Clarin-1                                      | CLRN1              | 3q25.1     |       |          | yes        |              |                |            |     |         | yes     | yes          |             |
| 243 | <a href="#">NX_Q9NQW8</a> | Cyclic nucleotide-gated cation channel beta-3 | CNGB3              | 8q21.3     |       |          | yes        |              | yes            |            |     |         | yes     | yes          |             |
| 244 | <a href="#">NX_Q5T1H1</a> | Protein eyes shut homolog 1                   | EYS                | 6q12       |       |          | yes        |              |                |            |     | yes     | yes     | yes          |             |
| 245 | <a href="#">NX_O43320</a> | Fibroblast growth factor 16                   | FGF16              | Xq21.1     |       |          | yes        |              | yes            |            |     |         | yes     | yes          |             |
| 246 | <a href="#">NX_P12034</a> | Fibroblast growth factor 5                    | FGF5               | 4q21.21    |       |          | yes        |              | yes            |            |     |         | yes     | yes          |             |
| 247 | <a href="#">NX_Q13461</a> | Forkhead box protein E3                       | FOXE3              | 1p33       |       |          | yes        |              |                |            |     |         | yes     | yes          | yes         |
| 248 | <a href="#">NX_P48165</a> | Gap junction alpha-8 protein                  | GJA8               | 1q21.2     |       |          | yes        |              |                |            |     |         | yes     | yes          | yes         |
| 249 | <a href="#">NX_P30968</a> | Gonadotropin-releasing hormone receptor 1     | GNRHR              | 4q13.2     |       |          | yes        |              |                |            |     |         | yes     | yes          | yes         |
| 250 | <a href="#">NX_A6NNB3</a> | Interferon-induced transmembrane protein 5    | IFITM5             | 11p15.5    |       |          | yes        |              |                |            |     |         | yes     | yes          |             |
| 251 | <a href="#">NX_Q9Y4Z2</a> | Neurogenin-3                                  | NEUROG3            | 10q22.1    |       |          | yes        |              |                | yes        |     |         |         | yes          | yes         |
| 252 | <a href="#">NX_A6NCS4</a> | Homeobox protein Nkx-2.6                      | NKX2-6             | 8p21.2     |       |          | yes        |              |                |            |     |         | yes     | yes          | yes         |
| 253 | <a href="#">NX_O43316</a> | Paired box protein Pax-4                      | PAX4               | 7q32.1     |       |          | yes        |              |                |            |     |         | yes     | yes          | yes         |
| 254 | <a href="#">NX_Q01453</a> | Peripheral myelin protein 22                  | PMP22              | 17p12      |       |          | yes        |              |                | yes        |     |         | yes     | yes          |             |
| 255 | <a href="#">NX_P49335</a> | POU domain, class 3, transcription factor 4   | POU3F4             | Xq21.1     |       |          | yes        |              | yes            |            |     |         | yes     | yes          |             |
| 256 | <a href="#">NX_Q15319</a> | POU domain, class 4, transcription factor 3   | POU4F3             | 5q32       |       |          | yes        |              |                |            |     |         | yes     | yes          | yes         |
| 257 | <a href="#">NX_P78424</a> | POU domain, class 6, transcription factor 2   | POU6F2             | 7p14.1     |       |          | yes        |              |                | yes        |     |         | yes     | yes          |             |
| 258 | <a href="#">NX_Q9Y6C5</a> | Protein patched homolog 2                     | PTCH2              | 1p34.1     |       |          | yes        |              |                |            |     |         | yes     | yes          | yes         |
| 259 | <a href="#">NX_Q9Y2M2</a> | Protein SSUH2 homolog                         | SSUH2              | 3p25.3     |       |          | yes        |              |                |            |     |         | yes     | yes          |             |
| 260 | <a href="#">NX_Q11203</a> | Chondroitin-6-sulfate 6-sulfatase             | ST3GAL3            | 1p34.1     |       |          | yes        |              |                |            | yes |         |         | yes          | yes         |
| 261 | <a href="#">NX_Q9Y458</a> | T-box transcription factor 22                 | TBX22              | Xq21.1     |       |          | yes        |              |                | yes        |     |         | yes     | yes          |             |
| 262 | <a href="#">NX_O75443</a> | Alpha-tectorin                                | TECTA              | 11q23.3    |       |          | yes        |              | yes            |            | yes |         |         |              |             |
| 263 | <a href="#">NX_Q86X19</a> | Transmembrane protein 17                      | TMEM17             | 2p15       |       |          | yes        |              |                | yes        |     |         |         |              | yes         |
| 264 | <a href="#">NX_Q9P0N5</a> | Transmembrane protein 216                     | TMEM216            | 11q12.2    |       |          | yes        |              | yes            |            |     |         |         | yes          |             |
| 265 | <a href="#">NX_P0DMS8</a> | Adenosine receptor A3                         | ADORA3             | 1p13.2     |       |          |            | yes          |                |            |     | yes     | yes     | yes          |             |
| 266 | <a href="#">NX_P13945</a> | Beta-3 adrenergic receptor                    | ADRB3              | 8p11.23    |       |          |            | yes          | yes            |            |     |         | yes     | yes          |             |
| 267 | <a href="#">NX_P30926</a> | Neuronal acetylcholine receptor 4             | CHRN4              | 15q25.1    |       |          |            | yes          | yes            |            |     |         | yes     | yes          |             |
| 268 | <a href="#">NX_Q8N104</a> | Beta-defensin 106                             | DEFB106A, DEFB106B | 8p23.1     |       |          |            | yes          | yes            |            |     |         | yes     | yes          |             |
| 269 | <a href="#">NX_Q14842</a> | Free fatty acid receptor 1                    | FFAR1              | 19q13.12   |       |          |            | yes          |                |            |     |         | yes     | yes          | yes         |
| 270 | <a href="#">NX_Q9NP95</a> | Fibroblast growth factor 20                   | FGF20              | 8p22       |       |          |            | yes          | yes            |            |     |         | yes     | yes          |             |
| 271 | <a href="#">NX_P55318</a> | Hepatocyte nuclear factor 3A                  | FOXA3              | 19q13.32   |       |          |            | yes          | yes            |            |     |         | yes     | yes          |             |
| 272 | <a href="#">NX_Q95843</a> | Guanylyl cyclase-activating protein 1C        | GUCA1C             | 3q13.13    |       |          |            | yes          |                |            | yes |         | yes     | yes          |             |
| 273 | <a href="#">NX_O43614</a> | Orexin receptor type 2                        | HCRTR2             | 6p12.1     |       |          |            | yes          |                |            |     |         | yes     | yes          | yes         |
| 274 | <a href="#">NX_Q9Y663</a> | Heparan sulfate glucosaminyltransferase 3A1   | HS3ST3A1           | 17p12      |       |          |            | yes          |                |            |     |         | yes     | yes          | yes         |
| 275 | <a href="#">NX_Q8IZT8</a> | Heparan sulfate glucosaminyltransferase 5     | HS3ST5             | 6q21       |       |          |            | yes          |                |            |     |         | yes     | yes          | yes         |
| 276 | <a href="#">NX_Q8IZI9</a> | Interferon lambda-3                           | IFNL3              | 19q13.2    |       |          |            | yes          |                |            |     |         | yes     | yes          | yes         |
| 277 | <a href="#">NX_P40933</a> | Interleukin-15                                | IL15               | 4q31.21    |       |          |            | yes          |                | yes        |     |         | yes     | yes          |             |
| 278 | <a href="#">NX_P08700</a> | Interleukin-3                                 | IL3                | 5q31.1     |       |          |            | yes          | yes            |            |     |         | yes     | yes          |             |
| 279 | <a href="#">NX_Q1MX18</a> | Protein inscuteable homolog                   | INSC               | 11p15.2    |       |          |            | yes          | yes            |            |     |         |         | yes          | yes         |
| 280 | <a href="#">NX_Q8WWN9</a> | Interactor protein for cytochrome P450 2C8    | IPCEF1             | 6q25.2     |       |          |            | yes          | yes            | yes        |     |         | yes     |              |             |
| 281 | <a href="#">NX_P48039</a> | Melatonin receptor type 1A                    | MTNR1A             | 4q35.2     |       |          |            | yes          |                | yes        |     |         | yes     | yes          |             |

Supplementary Table 2: Evidence for the 950 non-MS-based PE1 neXtProt Proteins (ordered by neXtProt accession code, Column A, for 906 with data)

|     | A                         | B                                           | C               | D                 | E     | F        | G          | H            | I              | J          | K   | L       | M       | N            |             |
|-----|---------------------------|---------------------------------------------|-----------------|-------------------|-------|----------|------------|--------------|----------------|------------|-----|---------|---------|--------------|-------------|
| 1   | accession code            | protein name                                | gene name(s)    | chromosome        | Edman | textbook | Disease mu | 3D structure | SP curated PPI | IntAct PPI | GOL | Exp PTM | Ab info | Exp function | mutagenesis |
| 282 | <a href="#">NX_Q14994</a> | Nuclear receptor subfamily 1                | NR1I3           | 1q23.3            |       |          |            | yes          |                |            |     | yes     |         | yes          |             |
| 283 | <a href="#">NX_P0CE72</a> | Oncomodulin-1                               | OCM             | 7p22.1            |       |          |            | yes          |                | yes        |     |         |         | yes          |             |
| 284 | <a href="#">NX_Q6ISU1</a> | Pre T-cell antigen receptor $\alpha$        | PTCRA           | 6p21.1            |       |          |            | yes          | yes            |            |     | yes     |         |              |             |
| 285 | <a href="#">NX_P33763</a> | Protein S100-A5                             | S100A5          | 1q21.3            |       |          |            | yes          | yes            |            |     |         |         | yes          |             |
| 286 | <a href="#">NX_Q00631</a> | Sarcophilin                                 | SLN             | 11q22.3           |       |          |            | yes          |                | yes        |     |         |         | yes          |             |
| 287 | <a href="#">NX_Q8WU08</a> | Serine/threonine-protein kinase             | STK32A          | 5q32              |       |          |            | yes          |                |            |     | yes     |         |              | yes         |
| 288 | <a href="#">NX_Q8IZX4</a> | Transcription initiation factor TAF1L       | TAF1L           | 9p21.1            |       |          |            | yes          | yes            |            |     |         |         | yes          |             |
| 289 | <a href="#">NX_Q96RP3</a> | Urocortin-2                                 | UCN2            | 3p21.31           |       |          |            | yes          | yes            |            |     |         |         | yes          |             |
| 290 | <a href="#">NX_Q9NPB9</a> | Atypical chemokine receptor ACKR4           | ACKR4           | 3q22.1            |       |          |            |              | yes            |            |     | yes     |         | yes          |             |
| 291 | <a href="#">NX_P25100</a> | Alpha-1D adrenergic receptor                | ADRA1D          | 20p13             |       |          |            |              | yes            | yes        |     |         |         | yes          |             |
| 292 | <a href="#">NX_Q9Y264</a> | Angiopoietin-4                              | ANGPT4          | 20p13             |       |          |            |              | yes            | yes        |     |         |         | yes          |             |
| 293 | <a href="#">NX_P0DMC3</a> | Apelin receptor early endogenous            | APELA           | 4q32.3            |       |          |            |              | yes            |            |     |         | yes     | yes          |             |
| 294 | <a href="#">NX_P0C7Q2</a> | Age-related maculopathy susceptibility      | ARMS2           | 10q26.13          |       |          |            |              |                | yes        |     |         | yes     |              | yes         |
| 295 | <a href="#">NX_Q9UHC3</a> | Acid-sensing ion channel 3                  | ASIC3           | 7q36.1            |       |          |            |              | yes            |            |     |         |         | yes          | yes         |
| 296 | <a href="#">NX_Q8N1L9</a> | Basic leucine zipper transcription factor 2 | BATF2           | 11q13.1           |       |          |            |              |                | yes        |     |         | yes     | yes          |             |
| 297 | <a href="#">NX_Q14599</a> | Testis-specific basic protein               | BPY2, BPY2B, BF | Yq11.23, Yq11.223 |       |          |            |              | yes            | yes        |     |         | yes     | yes          |             |
| 298 | <a href="#">NX_Q8NHW4</a> | C-C motif chemokine 4-like                  | CCL4L1, CCL4L2  | 17q12             |       |          |            |              | yes            | yes        |     |         |         | yes          |             |
| 299 | <a href="#">NX_P51677</a> | C-C chemokine receptor type                 | CCR3            | 3p21.31           |       |          |            |              | yes            | yes        |     |         |         | yes          |             |
| 300 | <a href="#">NX_P10966</a> | T-cell surface glycoprotein                 | CD8B            | 2p11.2            |       |          |            |              | yes            |            |     | yes     |         | yes          |             |
| 301 | <a href="#">NX_Q6PRD7</a> | Cementoblastoma-derived protein             | CEMP1           | 16p13.3           |       |          |            |              |                |            |     | yes     | yes     | yes          |             |
| 302 | <a href="#">NX_Q9GZZ6</a> | Neuronal acetylcholine receptor             | CHRNA10         | 11p15.4           |       |          |            |              | yes            |            |     |         | yes     | yes          | yes         |
| 303 | <a href="#">NX_Q8N1N5</a> | Cysteine-rich PAK1 inhibitor                | CRIPAK          | 4p16.3            |       |          |            |              | yes            | yes        |     |         |         | yes          |             |
| 304 | <a href="#">NX_Q86SG3</a> | Deleted in azoospermia protein              | DAZ4            | Yq11.23           |       |          |            |              | yes            |            |     |         | yes     | yes          |             |
| 305 | <a href="#">NX_Q8TF63</a> | Dendritic cell nuclear protein              | DCANP1          | 5q31.1            |       |          |            |              |                | yes        |     |         | yes     | yes          |             |
| 306 | <a href="#">NX_Q9H295</a> | Dendritic cell-specific transmembrane       | DCSTAMP         | 8q22.3            |       |          |            |              | yes            | yes        |     |         |         | yes          |             |
| 307 | <a href="#">NX_P21918</a> | D(1B) dopamine receptor                     | DRD5            | 4p16.1            |       |          |            |              |                |            |     | yes     |         | yes          | yes         |
| 308 | <a href="#">NX_Q8N1N2</a> | Dynactin-associated protein                 | DYNAP           | 18q21.2           |       |          |            |              | yes            |            |     |         | yes     | yes          |             |
| 309 | <a href="#">NX_Q9NR20</a> | Dual specificity tyrosine-phosphatase       | DYRK4           | 12p13.32          |       |          |            |              |                | yes        |     | yes     |         |              | yes         |
| 310 | <a href="#">NX_Q8IYF1</a> | Elongin-A2                                  | ELOA2           | 18q21.1           |       |          |            |              | yes            | yes        |     |         |         | yes          |             |
| 311 | <a href="#">NX_A4GXA9</a> | Probable crossover junction                 | EME2            | 16p13.3           |       |          |            |              | yes            | yes        |     |         |         | yes          |             |
| 312 | <a href="#">NX_Q69383</a> | Endogenous retrovirus group                 | ERVK-6          | 7q22.1            |       |          |            |              | yes            |            |     |         |         | yes          | yes         |
| 313 | <a href="#">NX_P47211</a> | Galanin receptor type 1                     | GALR1           | 18q23             |       |          |            |              |                | yes        |     | yes     |         | yes          |             |
| 314 | <a href="#">NX_P35212</a> | Gap junction alpha-4 protein                | GJA4            | 1p34.3            |       |          |            |              | yes            | yes        |     |         |         | yes          |             |
| 315 | <a href="#">NX_Q8N144</a> | Gap junction delta-3 protein                | GJD3            | 17q21.2           |       |          |            |              | yes            | yes        |     |         | yes     |              |             |
| 316 | <a href="#">NX_P23416</a> | Glycine receptor subunit alpha              | GLRA2           | Xp22.2            |       |          |            |              | yes            |            |     |         |         | yes          |             |
| 317 | <a href="#">NX_Q8NEA9</a> | Germ cell-less protein-like 2               | GMCL2           | 5q35.3            |       |          |            |              | yes            | yes        |     |         |         | yes          |             |
| 318 | <a href="#">NX_P60893</a> | Probable G-protein coupled                  | GPR85           | 7q31.1            |       |          |            |              | yes            |            |     |         |         | yes          | yes         |
| 319 | <a href="#">NX_Q9UNN4</a> | TFIIA-alpha and beta-like factor            | GTF2A1L         | 2p16.3            |       |          |            |              |                | yes        |     |         | yes     | yes          |             |
| 320 | <a href="#">NX_Q7Z2G1</a> | Histone H2B type W-T                        | H2BFWT          | Xq22.2            |       |          |            |              | yes            |            |     |         | yes     | yes          |             |
| 321 | <a href="#">NX_P28221</a> | 5-hydroxytryptamine receptor                | HTR1D           | 1p36.12           |       |          |            |              | yes            |            |     |         | yes     | yes          |             |

Supplementary Table 2: Evidence for the 950 non-MS-based PE1 neXtProt Proteins (ordered by neXtProt accession code, Column A, for 906 with data)

|     | A                          | B                              | C            | D          | E     | F        | G          | H            | I              | J          | K   | L       | M       | N            |             |
|-----|----------------------------|--------------------------------|--------------|------------|-------|----------|------------|--------------|----------------|------------|-----|---------|---------|--------------|-------------|
| 1   | accession code             | protein name                   | gene name(s) | chromosome | Edman | textbook | Disease mu | 3D structure | SP curated PPI | IntAct PPI | GOL | Exp PTM | Ab info | Exp function | mutagenesis |
| 322 | <a href="#">NX_Q8WXA8</a>  | 5-hydroxytryptamine receptc    | HTR3C        | 3q27.1     |       |          |            |              | yes            | yes        |     |         |         | yes          |             |
| 323 | <a href="#">NX_Q70Z44</a>  | 5-hydroxytryptamine receptc    | HTR3D        | 3q27.1     |       |          |            |              | yes            | yes        |     |         |         | yes          |             |
| 324 | <a href="#">NX_A5X5Y0</a>  | 5-hydroxytryptamine receptc    | HTR3E        | 3q27.1     |       |          |            |              | yes            | yes        |     |         |         | yes          |             |
| 325 | <a href="#">NX_P50406</a>  | 5-hydroxytryptamine receptc    | HTR6         | 1p36.13    |       |          |            |              | yes            | yes        |     |         |         | yes          |             |
| 326 | <a href="#">NX_P34969</a>  | 5-hydroxytryptamine receptc    | HTR7         | 10q23.31   |       |          |            |              |                | yes        |     | yes     |         | yes          |             |
| 327 | <a href="#">NX_Q2M3T9</a>  | Hyaluronidase-4                | HYAL4        | 7q31.32    |       |          |            |              |                |            |     | yes     |         | yes          |             |
| 328 | <a href="#">NX_Q8NFR9</a>  | Interleukin-17 receptor E      | IL17RE       | 3p25.3     |       |          |            |              | yes            | yes        |     |         |         | yes          |             |
| 329 | <a href="#">NX_Q9NPH9</a>  | Interleukin-26                 | IL26         | 12q15      |       |          |            |              | yes            |            |     |         | yes     | yes          |             |
| 330 | <a href="#">NX_Q8NEV9</a>  | Interleukin-27 subunit alpha   | IL27         | 16p11.2    |       |          |            |              | yes            | yes        |     |         |         | yes          |             |
| 331 | <a href="#">NX_Q9NZH7</a>  | Interleukin-36 beta            | IL36B        | 2q14.1     |       |          |            |              |                |            |     | yes     |         | yes          | yes         |
| 332 | <a href="#">NX_Q96PC2</a>  | Inositol hexakisphosphate ki   | IP6K3        | 6p21.31    |       |          |            |              |                | yes        |     |         |         | yes          | yes         |
| 333 | <a href="#">NX_Q14500</a>  | ATP-sensitive inward rectifie  | KCNJ12       | 17p11.2    |       |          |            |              | yes            | yes        |     |         |         | yes          |             |
| 334 | <a href="#">NX_Q7Z418</a>  | Potassium channel subfamil     | KCNK18       | 10q25.3    |       |          |            |              |                |            |     | yes     |         | yes          | yes         |
| 335 | <a href="#">NX_Q9NPA1</a>  | Calcium-activated potassiun    | KCNMB3       | 3q26.32    |       |          |            |              | yes            |            |     | yes     |         | yes          |             |
| 336 | <a href="#">NX_Q9BQ31</a>  | Potassium voltage-gated ch     | KCNS3        | 2p24.2     |       |          |            |              | yes            |            |     |         | yes     | yes          |             |
| 337 | <a href="#">NX_Q14943</a>  | Killer cell immunoglobulin-lik | KIR3DS1      | 19         |       |          |            |              | yes            | yes        |     |         |         | yes          |             |
| 338 | <a href="#">NX_P60372</a>  | Keratin-associated protein 1   | KRTAP10-4    | 21q22.3    |       |          |            |              | yes            | yes        |     |         |         | yes          |             |
| 339 | <a href="#">NX_P60370</a>  | Keratin-associated protein 1   | KRTAP10-5    | 21q22.3    |       |          |            |              | yes            | yes        |     |         |         | yes          |             |
| 340 | <a href="#">NX_P60409</a>  | Keratin-associated protein 1   | KRTAP10-7    | 21q22.3    |       |          |            |              | yes            | yes        |     |         |         | yes          |             |
| 341 | <a href="#">NX_P60410</a>  | Keratin-associated protein 1   | KRTAP10-8    | 21q22.3    |       |          |            |              | yes            | yes        |     |         |         | yes          |             |
| 342 | <a href="#">NX_P60411</a>  | Keratin-associated protein 1   | KRTAP10-9    | 21q22.3    |       |          |            |              | yes            | yes        |     |         |         | yes          |             |
| 343 | <a href="#">NX_P60328</a>  | Keratin-associated protein 1   | KRTAP12-3    | 21q22.3    |       |          |            |              | yes            | yes        |     |         |         | yes          |             |
| 344 | <a href="#">NX_P60329</a>  | Keratin-associated protein 1   | KRTAP12-4    | 21q22.3    |       |          |            |              | yes            | yes        |     |         |         | yes          |             |
| 345 | <a href="#">NX_Q9BQ66</a>  | Keratin-associated protein 4   | KRTAP4-12    | 17q21.2    |       |          |            |              | yes            | yes        |     |         |         | yes          |             |
| 346 | <a href="#">NX_Q6L8G4</a>  | Keratin-associated protein 5   | KRTAP5-11    | 11q13.4    |       |          |            |              | yes            | yes        |     |         |         | yes          |             |
| 347 | <a href="#">NX_Q701N4</a>  | Keratin-associated protein 5   | KRTAP5-2     | 11p15.5    |       |          |            |              | yes            | yes        |     |         |         | yes          |             |
| 348 | <a href="#">NX_Q6L8H2</a>  | Keratin-associated protein 5   | KRTAP5-3     | 11p15.5    |       |          |            |              | yes            | yes        |     |         |         | yes          |             |
| 349 | <a href="#">NX_Q6L8H1</a>  | Keratin-associated protein 5   | KRTAP5-4     | 11p15.5    |       |          |            |              | yes            | yes        |     |         |         | yes          |             |
| 350 | <a href="#">NX_Q6L8G9</a>  | Keratin-associated protein 5   | KRTAP5-6     | 11p15.5    |       |          |            |              | yes            | yes        |     |         |         | yes          |             |
| 351 | <a href="#">NX_P26371</a>  | Keratin-associated protein 5   | KRTAP5-9     | 11q13.4    |       |          |            |              | yes            | yes        |     |         |         | yes          |             |
| 352 | <a href="#">NX_Q8IUUC2</a> | Keratin-associated protein 8   | KRTAP8-1     | 21q22.11   |       |          |            |              | yes            | yes        |     |         |         | yes          |             |
| 353 | <a href="#">NX_Q5SRR4</a>  | Lymphocyte antigen 6 comp      | LY6G5C       | 6p21.33    |       |          |            |              | yes            |            |     | yes     |         | yes          |             |
| 354 | <a href="#">NX_P21145</a>  | Myelin and lymphocyte prote    | MAL          | 2q11.1     |       |          |            |              |                | yes        |     | yes     |         | yes          |             |
| 355 | <a href="#">NX_Q9P0N8</a>  | E3 ubiquitin-protein ligase M  | MARCH2       | 19p13.2    |       |          |            |              | yes            | yes        |     |         |         | yes          |             |
| 356 | <a href="#">NX_P04201</a>  | Proto-oncogene Mas             | MAS1         | 6q25.3     |       |          |            |              | yes            |            |     |         |         | yes          | yes         |
| 357 | <a href="#">NX_P33032</a>  | Melanocortin receptor 5        | MC5R         | 18p11.21   |       |          |            |              |                | yes        |     |         |         | yes          | yes         |
| 358 | <a href="#">NX_Q99705</a>  | Melanin-concentrating horm     | MCHR1        | 22q13.2    |       |          |            |              | yes            |            |     |         |         | yes          | yes         |
| 359 | <a href="#">NX_Q9H306</a>  | Matrix metalloproteinase-27    | MMP27        | 11q22.2    |       |          |            |              |                |            |     | yes     | yes     |              | yes         |
| 360 | <a href="#">NX_Q8TCY5</a>  | Melanocortin-2 receptor acc    | MRAP         | 21q22.11   |       |          |            |              | yes            | yes        |     |         |         | yes          |             |
| 361 | <a href="#">NX_O15457</a>  | MutS protein homolog 4         | MSH4         | 1p31.1     |       |          |            |              | yes            | yes        |     |         |         | yes          |             |

Supplementary Table 2: Evidence for the 950 non-MS-based PE1 neXtProt Proteins (ordered by neXtProt accession code, Column A, for 906 with data)

|     | A                             | B                                   | C            | D          | E     | F        | G          | H            | I              | J          | K   | L       | M       | N            |             |
|-----|-------------------------------|-------------------------------------|--------------|------------|-------|----------|------------|--------------|----------------|------------|-----|---------|---------|--------------|-------------|
| 1   | accession code                | protein name                        | gene name(s) | chromosome | Edman | textbook | Disease mu | 3D structure | SP curated PPI | IntAct PPI | GOL | Exp PTM | Ab info | Exp function | mutagenesis |
| 362 | <a href="#">NX_A0A0C5B5G6</a> | Mitochondrial-derived peptid        | MT-RNR1      | MT         |       |          |            |              |                |            |     |         | yes     | yes          | yes         |
| 363 | <a href="#">NX_P40205</a>     | N-cym protein                       | MYCNOS       | 2p24.3     |       |          |            |              | yes            |            |     |         | yes     | yes          |             |
| 364 | <a href="#">NX_P15172</a>     | Myoblast determination prot         | MYOD1        | 11p15.1    |       |          |            |              | yes            | yes        | yes |         |         |              |             |
| 365 | <a href="#">NX_Q02577</a>     | Helix-loop-helix protein 2          | NHLH2        | 1p13.1     |       |          |            |              | yes            | yes        |     |         |         | yes          |             |
| 366 | <a href="#">NX_Q9HBY0</a>     | NADPH oxidase 3                     | NOX3         | 6q25.3     |       |          |            |              | yes            |            |     |         |         | yes          | yes         |
| 367 | <a href="#">NX_Q8IUM7</a>     | Neuronal PAS domain-conta           | NPAS4        | 11q13.2    |       |          |            |              | yes            |            |     |         |         | yes          | yes         |
| 368 | <a href="#">NX_Q6W5P4</a>     | Neuropeptide S receptor             | NPSR1        | 7p14.3     |       |          |            |              |                |            |     |         | yes     | yes          | yes         |
| 369 | <a href="#">NX_P34982</a>     | Olfactory receptor 1D2              | OR1D2        | 17p13.3    |       |          |            |              |                |            |     |         | yes     | yes          | yes         |
| 370 | <a href="#">NX_Q13956</a>     | Retinal cone rhodopsin-sens         | PDE6H        | 12p12.3    |       |          |            |              | yes            | yes        |     |         |         | yes          |             |
| 371 | <a href="#">NX_Q56P42</a>     | Pyrin domain-containing pro         | PYDC2        | 3q28       |       |          |            |              | yes            | yes        |     |         |         | yes          |             |
| 372 | <a href="#">NX_Q15415</a>     | RNA-binding motif protein, $\gamma$ | RBM1F, RBMY1 | Yq11.223   |       |          |            |              | yes            | yes        |     |         |         | yes          |             |
| 373 | <a href="#">NX_Q75677</a>     | Ret finger protein-like 1           | RFPL1        | 22q12.2    |       |          |            |              |                |            | yes |         |         | yes          | yes         |
| 374 | <a href="#">NX_Q9H310</a>     | Ammonium transporter Rh t           | RHBG         | 1q22       |       |          |            |              | yes            |            |     |         |         | yes          | yes         |
| 375 | <a href="#">NX_Q6ZNE9</a>     | RUN and FYVE domain-con             | RUFY4        | 2q35       |       |          |            |              | yes            | yes        |     |         |         | yes          |             |
| 376 | <a href="#">NX_Q6ZPB5</a>     | Stress-responsive DNAJB4-           | SDIM1        | 6q27       |       |          |            |              | yes            |            |     |         | yes     | yes          |             |
| 377 | <a href="#">NX_Q9UJW9</a>     | SERTA domain-containing p           | SERTAD3      | 19q13.2    |       |          |            |              | yes            | yes        |     |         |         | yes          |             |
| 378 | <a href="#">NX_Q6ZSM3</a>     | Monocarboxylate transporte          | SLC16A12     | 10q23.31   |       |          |            |              | yes            |            |     |         |         | yes          | yes         |
| 379 | <a href="#">NX_Q8TDD2</a>     | Transcription factor Sp7            | SP7          | 12q13.13   |       |          |            |              |                |            | yes |         |         | yes          | yes         |
| 380 | <a href="#">NX_Q5MJ68</a>     | Speedy protein C                    | SPDYC        | 11q13.1    |       |          |            |              | yes            | yes        |     |         |         | yes          |             |
| 381 | <a href="#">NX_Q95947</a>     | T-box transcription factor TE       | TBX6         | 16p11.2    |       |          |            |              | yes            | yes        |     |         |         |              | yes         |
| 382 | <a href="#">NX_Q86TG1</a>     | Transmembrane protein 15C           | TMEM150A     | 2p11.2     |       |          |            |              | yes            | yes        |     |         |         | yes          |             |
| 383 | <a href="#">NX_Q5T4T1</a>     | Transmembrane protein 17C           | TMEM170B     | 6p24.2     |       |          |            |              | yes            |            |     |         | yes     | yes          |             |
| 384 | <a href="#">NX_Q6UWW9</a>     | Transmembrane protein 207           | TMEM207      | 3q28       |       |          |            |              | yes            |            |     |         | yes     |              | yes         |
| 385 | <a href="#">NX_Q8N661</a>     | Lysoplasmalogenase                  | TMEM86B      | 19q13.42   |       |          |            |              |                | yes        |     |         |         | yes          |             |
| 386 | <a href="#">NX_A6NDV4</a>     | Transmembrane protein 8B            | TMEM8B       | 9p13.3     |       |          |            |              | yes            |            | yes |         |         | yes          |             |
| 387 | <a href="#">NX_Q9HCX4</a>     | Short transient receptor pote       | TRPC7        | 5q31.1     |       |          |            |              | yes            | yes        | yes |         |         |              |             |
| 388 | <a href="#">NX_A1L167</a>     | Ubiquitin-conjugating enzym         | UBE2QL1      | 5p15.31    |       |          |            |              | yes            |            |     |         |         | yes          | yes         |
| 389 | <a href="#">NX_Q9BXU7</a>     | Ubiquitin carboxyl-terminal t       | USP26        | Xq26.2     |       |          |            |              | yes            |            |     |         |         | yes          | yes         |
| 390 | <a href="#">NX_P01611</a>     | Immunoglobulin kappa varia          | IGKV1D-12    | 2p11.2     | yes   | yes      |            |              |                |            |     |         |         |              |             |
| 391 | <a href="#">NX_P01566</a>     | Interferon alpha-10                 | IFNA10       | 9p21.3     | yes   |          |            |              |                |            |     |         |         | yes          |             |
| 392 | <a href="#">NX_P01571</a>     | Interferon alpha-17                 | IFNA17       | 9p21.3     | yes   |          |            |              |                |            |     |         |         | yes          |             |
| 393 | <a href="#">NX_P01568</a>     | Interferon alpha-21                 | IFNA21       | 9p21.3     | yes   |          |            |              |                |            |     |         |         | yes          |             |
| 394 | <a href="#">NX_Q9P0W0</a>     | Interferon kappa                    | IFNK         | 9p21.2     | yes   |          |            |              |                |            |     |         |         | yes          |             |
| 395 | <a href="#">NX_Q6UXB1</a>     | Insulin growth factor-like fan      | IGFL3        | 19q13.32   | yes   |          |            |              |                |            |     |         |         | yes          |             |
| 396 | <a href="#">NX_Q9Y5H9</a>     | Protocadherin alpha-2               | PCDHA2       | 5q31.3     | yes   |          |            |              |                |            |     |         |         | yes          |             |
| 397 | <a href="#">NX_P0DJD8</a>     | Pepsin A-3                          | PGA3         | 11q12.2    | yes   |          |            |              |                |            |     |         |         | yes          |             |
| 398 | <a href="#">NX_Q9UBD3</a>     | Cytokine SCM-1 beta                 | XCL2         | 1q24.2     | yes   |          |            |              |                | yes        |     |         |         |              |             |
| 399 | <a href="#">NX_A0A075B6T6</a> | T cell receptor alpha variabl       | TRAV12-2     | 14q11.2    |       | yes      |            | yes          |                |            |     |         |         |              |             |
| 400 | <a href="#">NX_A0A0B4J271</a> | T cell receptor alpha variabl       | TRAV12-3     | 14q11.2    |       | yes      |            | yes          |                |            |     |         |         |              |             |
| 401 | <a href="#">NX_A0A0B4J279</a> | T cell receptor alpha variabl       | TRAV21       | 14q11.2    |       | yes      |            | yes          |                |            |     |         |         |              |             |



Supplementary Table 2: Evidence for the 950 non-MS-based PE1 neXtProt Proteins (ordered by neXtProt accession code, Column A, for 906 with data)

|     | A                             | B                              | C            | D          | E     | F        | G          | H            | I              | J          | K   | L       | M       | N            |             |
|-----|-------------------------------|--------------------------------|--------------|------------|-------|----------|------------|--------------|----------------|------------|-----|---------|---------|--------------|-------------|
| 1   | accession code                | protein name                   | gene name(s) | chromosome | Edman | textbook | Disease mu | 3D structure | SP curated PPI | IntAct PPI | GOL | Exp PTM | Ab info | Exp function | mutagenesis |
| 442 | <a href="#">NX_Q96BM0</a>     | Interferon alpha-inducible pr  | IFI27L1      | 14q32.12   |       |          |            | yes          |                |            |     |         |         | yes          |             |
| 443 | <a href="#">NX_B2RXH2</a>     | Lysine-specific demethylase    | KDM4E        | 11q21      |       |          |            | yes          |                |            |     |         |         | yes          |             |
| 444 | <a href="#">NX_P43627</a>     | Killer cell immunoglobulin-lik | KIR2DL2      | 19         |       |          |            | yes          |                |            |     |         |         | yes          |             |
| 445 | <a href="#">NX_P43631</a>     | Killer cell immunoglobulin-lik | KIR2DS2      | 19         |       |          |            | yes          |                |            |     |         |         | yes          |             |
| 446 | <a href="#">NX_Q5VVY1</a>     | Alpha N-terminal protein me    | METTTL11B    | 1q24.2     |       |          |            | yes          |                |            |     |         |         | yes          |             |
| 447 | <a href="#">NX_O60882</a>     | Matrix metalloproteinase-20    | MMP20        | 11q22.2    |       |          |            | yes          |                |            |     |         |         | yes          |             |
| 448 | <a href="#">NX_Q86YV6</a>     | Myosin light chain kinase far  | MYLK4        | 6p25.2     |       |          |            | yes          |                | yes        |     |         |         |              |             |
| 449 | <a href="#">NX_Q9Y466</a>     | Nuclear receptor subfamily 2   | NR2E1        | 6q21       |       |          |            | yes          |                | yes        |     |         |         |              |             |
| 450 | <a href="#">NX_Q7Z6K4</a>     | Notch-regulated ankyrin rep    | NRARP        | 9q34.3     |       |          |            | yes          |                |            |     |         |         | yes          |             |
| 451 | <a href="#">NX_P58400</a>     | Neurexin-1-beta                | NRXN1        | 2p16.3     |       |          |            | yes          | yes            |            |     |         |         |              |             |
| 452 | <a href="#">NX_Q9Y5G1</a>     | Protocadherin gamma-B3         | PCDHGB3      | 5q31.3     |       |          |            | yes          |                |            |     |         |         | yes          |             |
| 453 | <a href="#">NX_Q9NZK7</a>     | Group IIE secretory phospho    | PLA2G2E      | 1p36.13    |       |          |            | yes          |                |            |     |         |         | yes          |             |
| 454 | <a href="#">NX_P62945</a>     | 60S ribosomal protein L41      | RPL41        | 12q13.2    |       |          |            | yes          |                |            |     |         |         | yes          |             |
| 455 | <a href="#">NX_Q86UU9</a>     | Tachykinin-4                   | TAC4         | 17q21.33   |       |          |            | yes          |                |            |     |         |         | yes          |             |
| 456 | <a href="#">NX_Q969D9</a>     | Thymic stromal lymphopoiet     | TSLP         | 5q22.1     |       |          |            | yes          |                |            |     |         |         | yes          |             |
| 457 | <a href="#">NX_P47992</a>     | Lymphotactin                   | XCL1         | 1q24.2     |       |          |            | yes          |                | yes        |     |         |         |              |             |
| 458 | <a href="#">NX_Q5I7T1</a>     | Putative Dol-P-Glc:Glc(2)Me    | ALG10B       | 12q12      |       |          |            |              |                |            |     |         |         | yes          | yes         |
| 459 | <a href="#">NX_Q6UXT8</a>     | ALK and LTK ligand 1           | ALKAL1       | 8q11.23    |       |          |            |              |                | yes        |     |         |         | yes          |             |
| 460 | <a href="#">NX_Q86SG2</a>     | Ankyrin repeat domain-cont     | ANKRD23      | 2q11.2     |       |          |            |              | yes            |            |     |         |         | yes          |             |
| 461 | <a href="#">NX_P41238</a>     | C->U-editing enzyme APOB       | APOBEC1      | 12p13.31   |       |          |            |              | yes            |            |     |         |         | yes          |             |
| 462 | <a href="#">NX_Q99819</a>     | Rho GDP-dissociation inhibi    | ARHGDIG      | 16p13.3    |       |          |            |              |                | yes        |     |         |         | yes          |             |
| 463 | <a href="#">NX_Q8W XK4</a>    | Ankyrin repeat and SOCS b      | ASB12        | Xq11.2     |       |          |            |              | yes            |            |     |         |         | yes          |             |
| 464 | <a href="#">NX_P50553</a>     | Achaete-scute homolog 1        | ASCL1        | 12q23.2    |       |          |            |              | yes            |            |     |         |         | yes          |             |
| 465 | <a href="#">NX_Q6XD76</a>     | Achaete-scute homolog 4        | ASCL4        | 12q23.3    |       |          |            |              |                | yes        |     |         |         | yes          |             |
| 466 | <a href="#">NX_Q9NY37</a>     | Acid-sensing ion channel 5     | ASIC5        | 4q32.1     |       |          |            |              |                |            |     |         |         | yes          | yes         |
| 467 | <a href="#">NX_Q6E213</a>     | Acyl-CoA wax alcohol acyltr    | AWAT2        | Xq13.1     |       |          |            |              |                |            |     |         |         | yes          |             |
| 468 | <a href="#">NX_Q43825</a>     | Beta-1,3-galactosyltransfera   | B3GALT2      | 1q31.2     |       |          |            |              |                |            |     |         |         | yes          |             |
| 469 | <a href="#">NX_Q6ZT62</a>     | Bargin                         | BARGIN       | 22q13.1    |       |          |            |              |                |            |     |         | yes     | yes          |             |
| 470 | <a href="#">NX_P46663</a>     | B1 bradykinin receptor         | BDKRB1       | 14q32.2    |       |          |            |              |                | yes        |     |         |         | yes          |             |
| 471 | <a href="#">NX_P62952</a>     | Bladder cancer-associated p    | BLCAP        | 20q11.23   |       |          |            |              |                | yes        |     |         |         | yes          |             |
| 472 | <a href="#">NX_Q8IZY5</a>     | BH3-like motif-containing ce   | BLID         | 11q24.1    |       |          |            |              |                |            |     |         |         | yes          | yes         |
| 473 | <a href="#">NX_P32247</a>     | Bombesin receptor subtype-     | BRS3         | Xq26.3     |       |          |            |              | yes            |            |     |         |         | yes          |             |
| 474 | <a href="#">NX_Q9NRJ1</a>     | Protein MOST-1                 | C8orf17      | 8q24.3     |       |          |            |              | yes            |            |     |         |         | yes          |             |
| 475 | <a href="#">NX_Q9BXT2</a>     | Voltage-dependent calcium      | CACNG6       | 19q13.42   |       |          |            |              | yes            |            |     |         |         | yes          |             |
| 476 | <a href="#">NX_Q6UXS9</a>     | Inactive caspase-12            | CASP12       | 11q22.3    |       |          |            |              |                | yes        |     |         |         | yes          |             |
| 477 | <a href="#">NX_A0A0K2S4Q6</a> | Protein CD300H                 | CD300H       | 17q25.1    |       |          |            |              | yes            |            |     |         |         | yes          |             |
| 478 | <a href="#">NX_Q95992</a>     | Cholesterol 25-hydroxylase     | CH25H        | 10q23.31   |       |          |            |              |                |            | yes |         |         | yes          |             |
| 479 | <a href="#">NX_P08912</a>     | Muscarinic acetylcholine rec   | CHRM5        | 15q14      |       |          |            |              |                | yes        |     |         |         | yes          |             |
| 480 | <a href="#">NX_Q15825</a>     | Neuronal acetylcholine rece    | CHRNA6       | 8p11.21    |       |          |            |              | yes            |            |     |         |         | yes          |             |
| 481 | <a href="#">NX_Q96Q77</a>     | Calcium and integrin-binding   | CIB3         | 19p13.11   |       |          |            |              | yes            | yes        |     |         |         |              |             |

Supplementary Table 2: Evidence for the 950 non-MS-based PE1 neXtProt Proteins (ordered by neXtProt accession code, Column A, for 906 with data)

|     | A                         | B                                                   | C              | D          | E     | F        | G          | H            | I              | J          | K   | L       | M       | N            |             |
|-----|---------------------------|-----------------------------------------------------|----------------|------------|-------|----------|------------|--------------|----------------|------------|-----|---------|---------|--------------|-------------|
| 1   | accession code            | protein name                                        | gene name(s)   | chromosome | Edman | textbook | Disease mu | 3D structure | SP curated PPI | IntAct PPI | GOL | Exp PTM | Ab info | Exp function | mutagenesis |
| 482 | <a href="#">NX_Q96AQ7</a> | Cell death activator CIDE-3                         | CIDEC          | 3p25.3     |       |          |            |              | yes            |            |     |         | yes     |              |             |
| 483 | <a href="#">NX_Q8IV77</a> | Cyclic nucleotide-gated cation channel subunit 4    | CNGA4          | 11p15.4    |       |          |            |              | yes            |            |     |         |         | yes          |             |
| 484 | <a href="#">NX_Q6PI25</a> | Protein cornichon homolog 2                         | CNIH2          | 11q13.2    |       |          |            |              | yes            |            |     |         | yes     |              |             |
| 485 | <a href="#">NX_O00230</a> | Cortistatin                                         | CORT           | 1p36.22    |       |          |            |              |                | yes        |     |         | yes     |              |             |
| 486 | <a href="#">NX_Q9H112</a> | Cystatin-11                                         | CST11          | 20p11.21   |       |          |            |              |                |            |     | yes     | yes     |              |             |
| 487 | <a href="#">NX_Q6V0L0</a> | Cytochrome P450 26C1                                | CYP26C1        | 10q23.33   |       |          |            |              |                |            |     |         | yes     | yes          |             |
| 488 | <a href="#">NX_P24903</a> | Cytochrome P450 2F1                                 | CYP2F1         | 19q13.2    |       |          |            |              |                |            |     |         | yes     |              | yes         |
| 489 | <a href="#">NX_Q9NS75</a> | Cysteinyl leukotriene receptor 2                    | CYSLTR2        | 13q14.2    |       |          |            |              |                | yes        |     |         | yes     |              |             |
| 490 | <a href="#">NX_P59103</a> | D-amino acid oxidase activator-like                 | DAOA           | 13q33.2    |       |          |            |              | yes            |            |     |         | yes     |              |             |
| 491 | <a href="#">NX_Q13117</a> | Deleted in azoospermia protein 2                    | DAZ2           | Yq11.223   |       |          |            |              | yes            |            |     |         | yes     |              |             |
| 492 | <a href="#">NX_Q9NR90</a> | Deleted in azoospermia protein 3                    | DAZ3           | Yq11.23    |       |          |            |              | yes            |            |     |         | yes     |              |             |
| 493 | <a href="#">NX_Q5T197</a> | E3 ubiquitin-protein ligase DUB                     | DCST1          | 1q21.3     |       |          |            |              | yes            |            |     |         | yes     |              |             |
| 494 | <a href="#">NX_Q96D03</a> | DNA damage-inducible transcription factor 4         | DDIT4L         | 4q24       |       |          |            |              |                | yes        |     |         | yes     |              |             |
| 495 | <a href="#">NX_Q30KQ6</a> | Beta-defensin 114                                   | DEFB114        | 6p12.3     |       |          |            |              |                |            |     | yes     | yes     |              |             |
| 496 | <a href="#">NX_O43261</a> | Leukemia-associated protein 1                       | DLEU1          | 13q14.3    |       |          |            |              |                | yes        |     |         | yes     |              |             |
| 497 | <a href="#">NX_Q92988</a> | Homeobox protein DLX-4                              | DLX4           | 17q21.33   |       |          |            |              |                | yes        |     |         | yes     |              |             |
| 498 | <a href="#">NX_O43812</a> | Double homeobox protein 1                           | DUX1           | 10q26.3    |       |          |            |              |                | yes        |     |         | yes     |              |             |
| 499 | <a href="#">NX_P0DPD6</a> | Endothelin-converting enzyme 2                      | ECE2           | 3q27.1     |       |          |            |              |                |            |     |         | yes     |              |             |
| 500 | <a href="#">NX_O14602</a> | Eukaryotic translation initiation factor 1A         | EIF1AY         | Yq11.223   |       |          |            |              |                | yes        |     | yes     |         |              |             |
| 501 | <a href="#">NX_Q8NG57</a> | Elongin-A3                                          | ELOA3          | 18q21.1    |       |          |            |              | yes            |            |     |         | yes     |              |             |
| 502 | <a href="#">NX_Q9HB03</a> | Elongation of very long chain fatty acid synthase 3 | ELOVL3         | 10q24.32   |       |          |            |              |                |            |     | yes     | yes     |              |             |
| 503 | <a href="#">NX_Q8N693</a> | Homeobox protein ESX1                               | ESX1           | Xq22.2     |       |          |            |              |                |            |     | yes     | yes     |              |             |
| 504 | <a href="#">NX_Q9NVL1</a> | Protein FAM86C1                                     | FAM86C1        | 11q13.4    |       |          |            |              | yes            | yes        |     |         |         |              |             |
| 505 | <a href="#">NX_O14843</a> | Free fatty acid receptor 3                          | FFAR3          | 19q13.12   |       |          |            |              |                |            |     |         | yes     | yes          |             |
| 506 | <a href="#">NX_Q5NUL3</a> | Free fatty acid receptor 4                          | FFAR4          | 10q23.33   |       |          |            |              |                |            |     | yes     | yes     |              | yes         |
| 507 | <a href="#">NX_P10767</a> | Fibroblast growth factor 6                          | FGF6           | 12p13.32   |       |          |            |              | yes            |            |     |         | yes     |              |             |
| 508 | <a href="#">NX_Q6QHK4</a> | Factor in the germline alpha                        | FIGLA          | 2p13.3     |       |          |            |              | yes            |            |     |         | yes     |              |             |
| 509 | <a href="#">NX_Q6ZQY3</a> | Acidic amino acid decarboxylase 1                   | GADL1          | 3p23       |       |          |            |              |                |            |     |         | yes     |              |             |
| 510 | <a href="#">NX_P0CL82</a> | G antigen 12I                                       | GAGE12I        | Xp11.23    |       |          |            |              | yes            | yes        |     |         |         |              |             |
| 511 | <a href="#">NX_Q13066</a> | G antigen 2B/2C                                     | GAGE2B, GAGE2C | Xp11.23    |       |          |            |              |                | yes        |     |         | yes     |              |             |
| 512 | <a href="#">NX_Q9GZZ7</a> | GDNF family receptor alpha 4                        | GFRA4          | 20p13      |       |          |            |              | yes            |            |     |         | yes     |              |             |
| 513 | <a href="#">NX_Q8IZ08</a> | G-protein coupled receptor 135                      | GPR135         | 14q23.1    |       |          |            |              | yes            |            |     |         | yes     |              |             |
| 514 | <a href="#">NX_Q8TDT2</a> | Probable G-protein coupled receptor 152             | GPR152         | 11q13.2    |       |          |            |              |                | yes        |     |         | yes     |              |             |
| 515 | <a href="#">NX_Q99678</a> | G-protein coupled receptor 20                       | GPR20          | 8q24.3     |       |          |            |              |                |            |     |         | yes     | yes          |             |
| 516 | <a href="#">NX_O00155</a> | Probable G-protein coupled receptor 25              | GPR25          | 1q32.1     |       |          |            |              |                | yes        |     |         | yes     |              |             |
| 517 | <a href="#">NX_Q8NDV2</a> | G-protein coupled receptor 26                       | GPR26          | 10q26.13   |       |          |            |              |                |            |     |         | yes     | yes          |             |
| 518 | <a href="#">NX_P46089</a> | G-protein coupled receptor 3                        | GPR3           | 1p36.11    |       |          |            |              |                | yes        |     |         | yes     |              |             |
| 519 | <a href="#">NX_O15529</a> | G-protein coupled receptor 42                       | GPR42          | 19q13.12   |       |          |            |              |                |            |     |         | yes     | yes          |             |
| 520 | <a href="#">NX_Q96P69</a> | G-protein coupled receptor 78                       | GPR78          | 4p16.1     |       |          |            |              |                |            |     |         | yes     | yes          |             |
| 521 | <a href="#">NX_P0C5Y9</a> | Histone H2A-Bbd type 1                              | H2AFB1         | Xq28       |       |          |            |              | yes            |            |     |         | yes     |              |             |

Supplementary Table 2: Evidence for the 950 non-MS-based PE1 neXtProt Proteins (ordered by neXtProt accession code, Column A, for 906 with data)

|     | A                         | B                              | C            | D          | E     | F        | G          | H            | I          | J   | K      | L       | M       | N       |              |             |
|-----|---------------------------|--------------------------------|--------------|------------|-------|----------|------------|--------------|------------|-----|--------|---------|---------|---------|--------------|-------------|
| 1   | accession code            | protein name                   | gene name(s) | chromosome | Edman | textbook | Disease mu | 3D structure | SP curated | PPI | IntAct | PPI GOL | Exp PTM | Ab info | Exp function | mutagenesis |
| 522 | <a href="#">NX_Q9BXC0</a> | Hydroxycarboxylic acid rece    | HCAR1        | 12q24.31   |       |          |            |              |            |     |        |         |         |         | yes          | yes         |
| 523 | <a href="#">NX_P49019</a> | Hydroxycarboxylic acid rece    | HCAR3        | 12q24.31   |       |          |            |              |            |     |        |         |         |         | yes          | yes         |
| 524 | <a href="#">NX_P0C7T4</a> | Minor histocompatibility prot  | HMSD         | 18q22.1    |       |          |            |              | yes        |     |        |         |         |         | yes          |             |
| 525 | <a href="#">NX_P35452</a> | Homeobox protein Hox-D12       | HOXD12       | 2q31.1     |       |          |            |              |            | yes |        |         |         |         | yes          |             |
| 526 | <a href="#">NX_Q9UBD0</a> | Heat shock transcription fac   | HSFX1, HSF2  | Xq28       |       |          |            |              |            | yes |        | yes     |         |         |              |             |
| 527 | <a href="#">NX_P28566</a> | 5-hydroxytryptamine recept     | HTR1E        | 6q14.3     |       |          |            |              |            | yes |        |         |         |         | yes          |             |
| 528 | <a href="#">NX_Q75409</a> | Huntingtin-interacting protei  | HYPM         | Xp11.4     |       |          |            |              | yes        | yes |        |         |         |         |              |             |
| 529 | <a href="#">NX_K9M1U5</a> | Interferon lambda-4            | IFNL4        | 19q13.2    |       |          |            |              |            |     |        |         |         |         | yes          | yes         |
| 530 | <a href="#">NX_Q9P0M4</a> | Interleukin-17C                | IL17C        | 16q24.2    |       |          |            |              | yes        |     |        |         |         |         | yes          |             |
| 531 | <a href="#">NX_Q9HB29</a> | Interleukin-1 receptor-like 2  | IL1RL2       | 2q12.1     |       |          |            |              |            |     |        | yes     |         |         | yes          |             |
| 532 | <a href="#">NX_B3KU38</a> | IQCJ-SCHIP1 readthrough t      | IQCJ-SCHIP1  | 3q25.32    |       |          |            |              | yes        |     |        |         |         |         | yes          |             |
| 533 | <a href="#">NX_A1A4Y4</a> | Immunity-related GTPase fa     | IRGM         | 5q33.1     |       |          |            |              |            |     |        | yes     |         |         | yes          |             |
| 534 | <a href="#">NX_Q13349</a> | Integrin alpha-D               | ITGAD        | 16p11.2    |       |          |            |              | yes        |     |        |         |         |         | yes          |             |
| 535 | <a href="#">NX_Q9H3M0</a> | Potassium voltage-gated ch     | KCNF1        | 2p25.1     |       |          |            |              | yes        |     |        |         |         |         | yes          |             |
| 536 | <a href="#">NX_Q9UJ96</a> | Potassium voltage-gated ch     | KCNG2        | 18q23      |       |          |            |              | yes        |     |        |         |         |         | yes          |             |
| 537 | <a href="#">NX_Q8TAE7</a> | Potassium voltage-gated ch     | KCNG3        | 2p21       |       |          |            |              | yes        |     |        |         |         |         | yes          |             |
| 538 | <a href="#">NX_Q8TDN1</a> | Potassium voltage-gated ch     | KCNG4        | 16q24.1    |       |          |            |              | yes        |     |        |         |         |         | yes          |             |
| 539 | <a href="#">NX_Q9ULD8</a> | Potassium voltage-gated ch     | KCNH3        | 12q13.12   |       |          |            |              | yes        |     |        |         |         |         | yes          |             |
| 540 | <a href="#">NX_Q8NCM2</a> | Potassium voltage-gated ch     | KCNH5        | 14q23.2    |       |          |            |              |            |     |        | yes     |         |         | yes          |             |
| 541 | <a href="#">NX_Q96T55</a> | Potassium channel subfamil     | KCNK16       | 6p21.2     |       |          |            |              |            | yes |        |         |         |         | yes          |             |
| 542 | <a href="#">NX_Q96KK3</a> | Potassium voltage-gated ch     | KCNS1        | 20q13.12   |       |          |            |              | yes        |     |        |         |         |         | yes          |             |
| 543 | <a href="#">NX_Q6PIU1</a> | Potassium voltage-gated ch     | KCNV1        | 8q23.2     |       |          |            |              | yes        |     |        |         |         |         | yes          |             |
| 544 | <a href="#">NX_Q14954</a> | Killer cell immunoglobulin-lik | KIR2DS1      | 19         |       |          |            |              | yes        |     |        |         |         |         | yes          |             |
| 545 | <a href="#">NX_Q9H2R5</a> | Kallikrein-15                  | KLK15        | 19q13.33   |       |          |            |              |            | yes |        |         |         |         | yes          |             |
| 546 | <a href="#">NX_Q07627</a> | Keratin-associated protein 1   | KRTAP1-1     | 17q21.2    |       |          |            |              |            | yes |        |         |         |         | yes          |             |
| 547 | <a href="#">NX_Q3LI76</a> | Keratin-associated protein 1   | KRTAP15-1    | 21q22.11   |       |          |            |              |            | yes |        |         |         |         | yes          |             |
| 548 | <a href="#">NX_Q3SYF9</a> | Keratin-associated protein 1   | KRTAP19-7    | 21q22.11   |       |          |            |              |            | yes |        |         |         |         | yes          |             |
| 549 | <a href="#">NX_A1A580</a> | Keratin-associated protein 2   | KRTAP23-1    | 21q22.11   |       |          |            |              |            | yes |        |         |         |         | yes          |             |
| 550 | <a href="#">NX_Q3LI64</a> | Keratin-associated protein 6   | KRTAP6-1     | 21q22.11   |       |          |            |              |            | yes |        |         |         |         | yes          |             |
| 551 | <a href="#">NX_Q3LI66</a> | Keratin-associated protein 6   | KRTAP6-2     | 21q22.11   |       |          |            |              |            | yes |        |         |         |         | yes          |             |
| 552 | <a href="#">NX_Q5T7P3</a> | Late cornified envelope prot   | LCE1B        | 1q21.3     |       |          |            |              |            | yes |        |         |         |         | yes          |             |
| 553 | <a href="#">NX_Q5T752</a> | Late cornified envelope prot   | LCE1D        | 1q21.3     |       |          |            |              |            | yes |        |         |         |         | yes          |             |
| 554 | <a href="#">NX_Q5T753</a> | Late cornified envelope prot   | LCE1E        | 1q21.3     |       |          |            |              |            | yes |        |         |         |         | yes          |             |
| 555 | <a href="#">NX_Q14633</a> | Late cornified envelope prot   | LCE2B        | 1q21.3     |       |          |            |              |            | yes |        |         |         |         | yes          |             |
| 556 | <a href="#">NX_Q5TA81</a> | Late cornified envelope prot   | LCE2C        | 1q21.3     |       |          |            |              |            | yes |        |         |         |         | yes          |             |
| 557 | <a href="#">NX_Q5TA77</a> | Late cornified envelope prot   | LCE3B        | 1q21.3     |       |          |            |              |            | yes |        |         |         |         | yes          |             |
| 558 | <a href="#">NX_Q5T5A8</a> | Late cornified envelope prot   | LCE3C        | 1q21.3     |       |          |            |              |            | yes |        |         |         |         | yes          |             |
| 559 | <a href="#">NX_Q5TA78</a> | Late cornified envelope prot   | LCE4A        | 1q21.3     |       |          |            |              |            | yes |        |         |         |         | yes          |             |
| 560 | <a href="#">NX_Q5TCM9</a> | Late cornified envelope prot   | LCE5A        | 1q21.3     |       |          |            |              |            | yes |        |         |         |         | yes          |             |
| 561 | <a href="#">NX_Q99677</a> | Lysophosphatidic acid recep    | LPAR4        | Xq21.1     |       |          |            |              |            |     |        | yes     |         |         | yes          |             |

Supplementary Table 2: Evidence for the 950 non-MS-based PE1 neXtProt Proteins (ordered by neXtProt accession code, Column A, for 906 with data)

|     | A                         | B                              | C            | D          | E     | F        | G          | H            | I          | J   | K      | L       | M       | N       |              |             |
|-----|---------------------------|--------------------------------|--------------|------------|-------|----------|------------|--------------|------------|-----|--------|---------|---------|---------|--------------|-------------|
| 1   | accession code            | protein name                   | gene name(s) | chromosome | Edman | textbook | Disease mu | 3D structure | SP curated | PPI | IntAct | PPI GOL | Exp PTM | Ab info | Exp function | mutagenesis |
| 562 | <a href="#">NX_Q8WV35</a> | Leucine-rich repeat-containii  | LRRC29       | 16q22.1    |       |          |            |              |            |     | yes    |         |         |         | yes          |             |
| 563 | <a href="#">NX_Q5VT99</a> | Leucine-rich repeat-containii  | LRRC38       | 1p36.21    |       |          |            |              | yes        |     |        |         |         |         | yes          |             |
| 564 | <a href="#">NX_Q8NDX9</a> | Lymphocyte antigen 6 comp      | LY6G5B       | 6p21.33    |       |          |            |              | yes        |     |        | yes     |         |         |              |             |
| 565 | <a href="#">NX_Q95868</a> | Lymphocyte antigen 6 comp      | LY6G6D       | 6p21.33    |       |          |            |              | yes        |     |        | yes     |         |         |              |             |
| 566 | <a href="#">NX_Q8WZ33</a> | MaFF-interacting protein       | MAFIP        | 4          |       |          |            |              | yes        |     |        |         |         |         | yes          |             |
| 567 | <a href="#">NX_Q56UN5</a> | Mitogen-activated protein kir  | MAP3K19      | 2q21.3     |       |          |            |              |            |     |        | yes     |         |         |              | yes         |
| 568 | <a href="#">NX_Q96T53</a> | Ghrelin O-acyltransferase      | MBOAT4       | 8p12       |       |          |            |              |            |     |        |         |         | yes     |              | yes         |
| 569 | <a href="#">NX_P41968</a> | Melanocortin receptor 3        | MC3R         | 20q13.2    |       |          |            |              |            | yes |        |         |         |         |              | yes         |
| 570 | <a href="#">NX_Q969V1</a> | Melanin-concentrating horm     | MCHR2        | 6q16.2     |       |          |            |              |            |     |        |         |         |         | yes          | yes         |
| 571 | <a href="#">NX_Q0VG99</a> | Mesoderm posterior protein     | MESP2        | 15q26.1    |       |          |            |              |            |     |        |         |         |         | yes          | yes         |
| 572 | <a href="#">NX_Q9H2W2</a> | Homeobox protein MIXL1         | MIXL1        | 1q42.12    |       |          |            |              |            |     |        | yes     | yes     |         |              | yes         |
| 573 | <a href="#">NX_Q96LB2</a> | Mas-related G-protein coupl    | MRGPRX1      | 11p15.1    |       |          |            |              |            |     |        |         |         |         | yes          | yes         |
| 574 | <a href="#">NX_Q96LB1</a> | Mas-related G-protein coupl    | MRGPRX2      | 11p15.1    |       |          |            |              |            |     |        |         |         | yes     |              |             |
| 575 | <a href="#">NX_Q96JQ5</a> | Membrane-spanning 4-dom:       | MS4A4A       | 11q12.2    |       |          |            |              |            |     | yes    |         |         |         | yes          | yes         |
| 576 | <a href="#">NX_Q60682</a> | Musculin                       | MSC          | 8q13.3     |       |          |            |              | yes        |     |        |         |         |         | yes          |             |
| 577 | <a href="#">NX_Q92886</a> | Neurogenin-1                   | NEUROG1      | 5q31.1     |       |          |            |              | yes        |     | yes    |         |         |         |              |             |
| 578 | <a href="#">NX_Q8IY84</a> | Serine/threonine-protein kin:  | NIM1K        | 5p12       |       |          |            |              |            |     |        | yes     |         |         |              | yes         |
| 579 | <a href="#">NX_P28336</a> | Neuromedin-B receptor          | NMBR         | 6q24.1     |       |          |            |              |            |     |        | yes     | yes     |         |              |             |
| 580 | <a href="#">NX_P0DPK3</a> | Notch homolog 2 N-terminal     | NOTCH2NLB    | 1q21.2     |       |          |            |              | yes        |     |        |         |         |         | yes          |             |
| 581 | <a href="#">NX_P0DPK4</a> | Notch homolog 2 N-terminal     | NOTCH2NLC    | 1q21.2     |       |          |            |              | yes        |     |        |         |         |         | yes          |             |
| 582 | <a href="#">NX_Q9NZP6</a> | Nuclear pore-associated pro    | NPAP1        | 15q11.2    |       |          |            |              | yes        |     |        |         |         |         | yes          |             |
| 583 | <a href="#">NX_P48146</a> | Neuropeptides B/W recepto      | NPBWR2       | 20q13.33   |       |          |            |              |            |     | yes    |         |         |         | yes          |             |
| 584 | <a href="#">NX_Q8IZ57</a> | Neurensin-1                    | NRSN1        | 6p22.3     |       |          |            |              |            |     | yes    |         |         |         | yes          |             |
| 585 | <a href="#">NX_Q95665</a> | Neurotensin receptor type 2    | NTSR2        | 2p25.1     |       |          |            |              |            |     |        | yes     | yes     |         |              |             |
| 586 | <a href="#">NX_Q96G61</a> | Diphosphoinositol polyphos     | NUDT11       | Xp11.22    |       |          |            |              |            |     |        |         |         |         | yes          |             |
| 587 | <a href="#">NX_Q17RF5</a> | Odontogenesis associated p     | ODAPH        | 4q21.1     |       |          |            |              |            |     | yes    |         |         |         | yes          |             |
| 588 | <a href="#">NX_Q2M2E3</a> | Outer dense fiber protein 4    | ODF4         | 17p13.1    |       |          |            |              |            |     | yes    |         |         | yes     |              |             |
| 589 | <a href="#">NX_Q8IZS5</a> | Orofacial cleft 1 candidate g  | OFCC1        | 6p24.3     |       |          |            |              |            |     | yes    | yes     |         |         |              |             |
| 590 | <a href="#">NX_Q7RTU3</a> | Oligodendrocyte transcriptio   | OLIG3        | 6q23.3     |       |          |            |              |            |     | yes    |         |         |         | yes          |             |
| 591 | <a href="#">NX_Q9UHM6</a> | Melanopsin                     | OPN4         | 10q23.2    |       |          |            |              |            |     |        | yes     |         |         | yes          |             |
| 592 | <a href="#">NX_A6NND4</a> | Olfactory receptor 2AT4        | OR2AT4       | 11q13.4    |       |          |            |              |            |     |        |         | yes     | yes     |              |             |
| 593 | <a href="#">NX_Q76001</a> | Olfactory receptor 2J3         | OR2J3        | 6p22.1     |       |          |            |              |            |     |        |         |         |         | yes          | yes         |
| 594 | <a href="#">NX_P61366</a> | Osteocrin                      | OSTN         | 3q28       |       |          |            |              |            |     |        |         | yes     | yes     |              |             |
| 595 | <a href="#">NX_Q5XKR4</a> | Homeobox protein orthoped      | OTP          | 5q14.1     |       |          |            |              |            |     |        |         | yes     | yes     |              |             |
| 596 | <a href="#">NX_Q15547</a> | P2X purinoceptor 6             | P2RX6        | 22q11.21   |       |          |            |              | yes        |     |        | yes     |         |         |              |             |
| 597 | <a href="#">NX_Q2NL67</a> | Protein mono-ADP-ribosyltr     | PARP6        | 15q23      |       |          |            |              |            |     |        | yes     |         |         | yes          |             |
| 598 | <a href="#">NX_Q9BZA8</a> | Protocadherin-11 Y-linked      | PCDH11Y      | Yp11.2     |       |          |            |              | yes        |     |        |         |         |         | yes          |             |
| 599 | <a href="#">NX_Q58A44</a> | Prostate collagen triple helix | PCOTH        | 13q12.12   |       |          |            |              |            |     | yes    |         |         |         | yes          |             |
| 600 | <a href="#">NX_Q8N328</a> | PiggyBac transposable elerr    | PGBD3        | 10q11.23   |       |          |            |              |            |     |        |         | yes     | yes     |              |             |
| 601 | <a href="#">NX_Q7Z442</a> | Polycystic kidney disease pr   | PKD1L2       | 16q23.2    |       |          |            |              | yes        |     |        |         |         |         | yes          |             |

Supplementary Table 2: Evidence for the 950 non-MS-based PE1 neXtProt Proteins (ordered by neXtProt accession code, Column A, for 906 with data)

|     | A                         | B                                   | C            | D          | E     | F        | G          | H            | I              | J          | K   | L       | M       | N            |             |
|-----|---------------------------|-------------------------------------|--------------|------------|-------|----------|------------|--------------|----------------|------------|-----|---------|---------|--------------|-------------|
| 1   | accession code            | protein name                        | gene name(s) | chromosome | Edman | textbook | Disease mu | 3D structure | SP curated PPI | IntAct PPI | GOL | Exp PTM | Ab info | Exp function | mutagenesis |
| 602 | <a href="#">NX_Q7Z443</a> | Polycystic kidney disease pr        | PKD1L3       | 16q22.2    |       |          |            |              | yes            |            |     |         |         | yes          |             |
| 603 | <a href="#">NX_P81277</a> | Prolactin-releasing peptide         | PRLH         | 2q37.3     |       |          |            |              |                |            |     |         |         | yes          | yes         |
| 604 | <a href="#">NX_Q8TCW9</a> | Prokineticin receptor 1             | PROKR1       | 2p13.3     |       |          |            |              |                |            |     | yes     | yes     |              |             |
| 605 | <a href="#">NX_A5LHX3</a> | Proteasome subunit beta ty          | PSMB11       | 14q11.2    |       |          |            |              | yes            |            |     | yes     |         |              |             |
| 606 | <a href="#">NX_Q3KNS1</a> | Patched domain-containing           | PTCHD3       | 10p12.1    |       |          |            |              |                |            |     | yes     | yes     |              |             |
| 607 | <a href="#">NX_P43088</a> | Prostaglandin F2-alpha rece         | PTGFR        | 1p31.1     |       |          |            |              | yes            |            |     |         |         | yes          |             |
| 608 | <a href="#">NX_Q4JDL3</a> | Tyrosine-protein phosphata          | PTPN20       | 10q11.22   |       |          |            |              |                |            |     | yes     | yes     |              |             |
| 609 | <a href="#">NX_W6CW81</a> | Pyrin domain-containing pro         | PYDC5        | 1q23.1     |       |          |            |              | yes            |            |     |         |         | yes          |             |
| 610 | <a href="#">NX_Q09MP3</a> | RAD51-associated protein 2          | RAD51AP2     | 2p24.2     |       |          |            |              | yes            |            |     |         |         |              | yes         |
| 611 | <a href="#">NX_Q92737</a> | Ras-like protein family mem         | RASL10A      | 22q12.2    |       |          |            |              |                |            | yes |         |         | yes          |             |
| 612 | <a href="#">NX_P0DJD4</a> | RNA-binding motif protein, $\gamma$ | RBMY1C       | Yq11.23    |       |          |            |              | yes            |            |     |         |         | yes          |             |
| 613 | <a href="#">NX_Q75679</a> | Ret finger protein-like 3           | RFPL3        | 22q12.3    |       |          |            |              |                | yes        |     |         |         | yes          |             |
| 614 | <a href="#">NX_Q94810</a> | Regulator of G-protein signa        | RGS11        | 16p13.3    |       |          |            |              |                |            |     |         |         | yes          | yes         |
| 615 | <a href="#">NX_Q9H0A6</a> | RING finger protein 32              | RNF32        | 7q36.3     |       |          |            |              |                |            | yes |         |         | yes          |             |
| 616 | <a href="#">NX_Q969Q0</a> | 60S ribosomal protein L36a-         | RPL36AL      | 14q21.3    |       |          |            |              |                |            | yes |         |         |              |             |
| 617 | <a href="#">NX_Q8TDU9</a> | Relaxin-3 receptor 2                | RXFP4        | 1q22       |       |          |            |              |                |            |     | yes     |         | yes          |             |
| 618 | <a href="#">NX_P0DPB3</a> | Schwannomin-interacting pr          | SCHIP1       | 3q25.33    |       |          |            |              | yes            |            |     | yes     |         |              |             |
| 619 | <a href="#">NX_P0C7M3</a> | Surfactant-associated protei        | SFTA3        | 14q13.3    |       |          |            |              |                |            |     |         | yes     | yes          |             |
| 620 | <a href="#">NX_Q3KNW5</a> | Solute carrier family 10 mem        | SLC10A6      | 4q21.3     |       |          |            |              |                |            | yes |         |         | yes          |             |
| 621 | <a href="#">NX_Q9UKG4</a> | Solute carrier family 13 mem        | SLC13A4      | 7q33       |       |          |            |              |                | yes        |     |         |         | yes          |             |
| 622 | <a href="#">NX_Q14916</a> | Sodium-dependent phospho            | SLC17A1      | 6p22.2     |       |          |            |              |                |            |     |         |         | yes          | yes         |
| 623 | <a href="#">NX_Q9BR10</a> | Spermatogenesis-associate           | SPATA25      | 20q13.12   |       |          |            |              |                |            |     |         | yes     | yes          |             |
| 624 | <a href="#">NX_Q99865</a> | Spindlin-2A                         | SPIN2A       | Xp11.21    |       |          |            |              | yes            |            |     |         |         | yes          |             |
| 625 | <a href="#">NX_Q969W0</a> | Serine palmitoyltransferase         | SPTSSA       | 14q13.1    |       |          |            |              | yes            |            |     |         |         | yes          |             |
| 626 | <a href="#">NX_Q8NFR3</a> | Serine palmitoyltransferase         | SPTSSB       | 3q26.1     |       |          |            |              | yes            |            |     |         |         | yes          |             |
| 627 | <a href="#">NX_Q8NEQ6</a> | Steroid receptor-associated         | SRARP        | 1p36.13    |       |          |            |              | yes            |            |     |         |         | yes          |             |
| 628 | <a href="#">NX_P32745</a> | Somatostatin receptor type 3        | SSTR3        | 22q13.1    |       |          |            |              |                | yes        |     |         |         | yes          |             |
| 629 | <a href="#">NX_Q60224</a> | Protein SSX4                        | SSX4, SSX4B  | Xp11.23    |       |          |            |              |                | yes        |     |         |         | yes          |             |
| 630 | <a href="#">NX_P21452</a> | Substance-K receptor                | TACR2        | 10q22.1    |       |          |            |              |                |            |     |         |         | yes          |             |
| 631 | <a href="#">NX_Q9NYY7</a> | Taste receptor type 2 memb          | TAS2R16      | 7q31.32    |       |          |            |              | yes            |            |     |         |         | yes          |             |
| 632 | <a href="#">NX_Q8IZP1</a> | TBC1 domain family membe            | TBC1D3       | 17q12      |       |          |            |              |                |            | yes |         |         | yes          |             |
| 633 | <a href="#">NX_Q8NA77</a> | Testis-expressed protein 19         | TEX19        | 17q25.3    |       |          |            |              | yes            |            |     |         |         | yes          |             |
| 634 | <a href="#">NX_Q8IUEO</a> | Homeobox protein TGIF2LY            | TGIF2LY      | Yp11.2     |       |          |            |              |                |            | yes |         |         | yes          |             |
| 635 | <a href="#">NX_Q95411</a> | TGFB1-induced anti-apopto           | TIAF1        | 17q11.2    |       |          |            |              |                |            | yes |         |         | yes          |             |
| 636 | <a href="#">NX_Q969S6</a> | Transmembrane protein 203           | TMEM203      | 9q34.3     |       |          |            |              | yes            |            |     |         |         | yes          |             |
| 637 | <a href="#">NX_Q96NL1</a> | Transmembrane protein 74            | TMEM74       | 8q23.1     |       |          |            |              |                |            | yes |         |         | yes          |             |
| 638 | <a href="#">NX_Q7Z410</a> | Transmembrane protease s            | TMPRSS9      | 19p13.3    |       |          |            |              |                |            | yes |         |         | yes          |             |
| 639 | <a href="#">NX_P09430</a> | Spermatid nuclear transition        | TNP1         | 2q35       |       |          |            |              |                | yes        |     |         | yes     |              |             |
| 640 | <a href="#">NX_Q8N2E6</a> | Prosalusin                          | TOR2A        | 9q34.11    |       |          |            |              |                |            | yes |         |         | yes          |             |
| 641 | <a href="#">NX_Q6XPS3</a> | Phosphatidylinositol 3,4,5-tri      | TPTE2        | 13q12.11   |       |          |            |              |                |            |     |         |         | yes          | yes         |



Supplementary Table 2: Evidence for the 950 non-MS-based PE1 neXtProt Proteins (ordered by neXtProt accession code, Column A, for 906 with data)

|     | A                         | B                             | C            | D          | E     | F        | G          | H            | I          | J   | K          | L   | M       | N       |              |             |
|-----|---------------------------|-------------------------------|--------------|------------|-------|----------|------------|--------------|------------|-----|------------|-----|---------|---------|--------------|-------------|
| 1   | accession code            | protein name                  | gene name(s) | chromosome | Edman | textbook | Disease mu | 3D structure | SP curated | PPI | IntAct PPI | GOL | Exp PTM | Ab info | Exp function | mutagenesis |
| 682 | <a href="#">NX_Q8TDI8</a> | Transmembrane channel-lik     | TMC1         | 9q21.13    |       |          | yes        |              |            |     |            |     |         |         |              |             |
| 683 | <a href="#">NX_Q9NPZ5</a> | Galactosylgalactosylxylosyl   | B3GAT2       | 6q13       |       |          |            | yes          |            |     |            |     |         |         |              |             |
| 684 | <a href="#">NX_Q86V35</a> | Calcium-binding protein 7     | CABP7        | 22q12.2    |       |          |            | yes          |            |     |            |     |         |         |              |             |
| 685 | <a href="#">NX_Q9Y6F7</a> | Testis-specific chromodoma    | CDY2A, CDY2B | Yq11.222   |       |          |            | yes          |            |     |            |     |         |         |              |             |
| 686 | <a href="#">NX_A6NCL1</a> | Geminin coiled-coil domain-   | GMNC         | 3q28       |       |          |            | yes          |            |     |            |     |         |         |              |             |
| 687 | <a href="#">NX_Q6EKJ0</a> | General transcription factor  | GTF2IRD2B    | 7q11.23    |       |          |            | yes          |            |     |            |     |         |         |              |             |
| 688 | <a href="#">NX_P0C025</a> | Nucleoside diphosphate-link   | NUDT17       | 1q21.1     |       |          |            | yes          |            |     |            |     |         |         |              |             |
| 689 | <a href="#">NX_Q14863</a> | POU domain, class 6, trans    | POU6F1       | 12q13.13   |       |          |            | yes          |            |     |            |     |         |         |              |             |
| 690 | <a href="#">NX_P83881</a> | 60S ribosomal protein L36a    | RPL36A       | Xq22.1     |       |          |            | yes          |            |     |            |     |         |         |              |             |
| 691 | <a href="#">NX_P59095</a> | StAR-related lipid transfer p | STARD6       | 18q21.2    |       |          |            | yes          |            |     |            |     |         |         |              |             |
| 692 | <a href="#">NX_Q9H0W7</a> | THAP domain-containing pr     | THAP2        | 12q21.1    |       |          |            | yes          |            |     |            |     |         |         |              |             |
| 693 | <a href="#">NX_Q43763</a> | T-cell leukemia homeobox p    | TLX2         | 2p13.1     |       |          |            | yes          |            |     |            |     |         |         |              |             |
| 694 | <a href="#">NX_Q504Y3</a> | Zinc finger CW-type PWWP      | ZCWPW2       | 3p24.1     |       |          |            | yes          |            |     |            |     |         |         |              |             |
| 695 | <a href="#">NX_Q8NEG5</a> | E3 ubiquitin-protein ligase   | ZSWIM2       | 2q32.1     |       |          |            | yes          |            |     |            |     |         |         |              |             |
| 696 | <a href="#">NX_Q5BKY6</a> | Putative uncharacterized pr   |              | 22q11.21   |       |          |            |              |            | yes |            |     |         |         |              |             |
| 697 | <a href="#">NX_Q5W150</a> | Putative uncharacterized pr   |              | 20q11.21   |       |          |            |              |            | yes |            |     |         |         |              |             |
| 698 | <a href="#">NX_Q9UNA3</a> | Alpha-1,4-N-acetylglucosam    | A4GNT        | 3q22.3     |       |          |            |              |            |     |            |     |         |         | yes          |             |
| 699 | <a href="#">NX_Q96J65</a> | Multidrug resistance-associ   | ABCC12       | 16q12.1    |       |          |            |              |            |     |            |     |         | yes     |              |             |
| 700 | <a href="#">NX_Q96SE0</a> | Protein ABHD1                 | ABHD1        | 2p23.3     |       |          |            |              |            | yes |            |     |         |         |              |             |
| 701 | <a href="#">NX_Q86XS5</a> | Angiopoietin-related protein  | ANGPTL5      | 11q22.1    |       |          |            |              |            | yes |            |     |         |         |              |             |
| 702 | <a href="#">NX_Q8N2N9</a> | Ankyrin repeat domain-cont    | ANKRD36B     | 2q11.2     |       |          |            |              |            | yes |            |     |         |         |              |             |
| 703 | <a href="#">NX_Q96NS5</a> | Ankyrin repeat and SOCS b     | ASB16        | 17q21.31   |       |          |            |              |            | yes |            |     |         |         |              |             |
| 704 | <a href="#">NX_Q156A1</a> | Ataxin-8                      | ATXN8        | 13q21      |       |          |            |              |            |     |            | yes |         |         |              |             |
| 705 | <a href="#">NX_Q58HT5</a> | Acyl-CoA wax alcohol acyltr   | AWAT1        | Xq13.1     |       |          |            |              |            |     |            |     |         |         | yes          |             |
| 706 | <a href="#">NX_Q9C0J1</a> | N-acetyllactosaminide beta-   | B3GNT4       | 12q24.31   |       |          |            |              |            |     |            |     |         |         | yes          |             |
| 707 | <a href="#">NX_Q5H9J7</a> | Protein BEX5                  | BEX5         | Xq22.1     |       |          |            |              |            | yes |            |     |         |         |              |             |
| 708 | <a href="#">NX_Q5S7W7</a> | Uncharacterized protein C1    | C10orf55     | 10q22.2    |       |          |            |              |            | yes |            |     |         |         |              |             |
| 709 | <a href="#">NX_Q9H7T3</a> | Uncharacterized protein C1    | C10orf95     | 10q24.32   |       |          |            |              |            | yes |            |     |         |         |              |             |
| 710 | <a href="#">NX_Q8NA57</a> | Uncharacterized protein C1    | C12orf50     | 12q21.32   |       |          |            |              |            | yes |            |     |         |         |              |             |
| 711 | <a href="#">NX_Q0P5P2</a> | Uncharacterized protein C1    | C17orf67     | 17q22      |       |          |            |              |            | yes |            |     |         |         |              |             |
| 712 | <a href="#">NX_Q86X59</a> | Putative uncharacterized pr   | C17orf82     | 17q23.2    |       |          |            |              |            | yes |            |     |         |         |              |             |
| 713 | <a href="#">NX_Q9NVV2</a> | Putative uncharacterized pr   | C19orf73     | 19q13.33   |       |          |            |              |            | yes |            |     |         |         |              |             |
| 714 | <a href="#">NX_Q95561</a> | Uncharacterized protein C1    | C1orf105     | 1q24.3     |       |          |            |              |            | yes |            |     |         |         |              |             |
| 715 | <a href="#">NX_Q9BZE7</a> | UPF0193 protein EVG1          | C22orf23     | 22q13.1    |       |          |            |              |            | yes |            |     |         |         |              |             |
| 716 | <a href="#">NX_Q8TAL5</a> | Uncharacterized protein C9    | C9orf43      | 9q32       |       |          |            |              |            | yes |            |     |         |         |              |             |
| 717 | <a href="#">NX_Q86XJ0</a> | Calcium homeostasis modul     | CALHM3       | 10q24.33   |       |          |            |              |            | yes |            |     |         |         |              |             |
| 718 | <a href="#">NX_Q9BXU9</a> | Calcium-binding protein 8     | CALN1        | 7q11.22    |       |          |            |              |            | yes |            |     |         |         |              |             |
| 719 | <a href="#">NX_Q8N7E2</a> | E3 ubiquitin-protein ligase   | CBLL2        | Xp22.11    |       |          |            |              |            |     |            |     |         |         | yes          |             |
| 720 | <a href="#">NX_Q494R4</a> | Coiled-coil domain-contain    | CCDC153      | 11q23.3    |       |          |            |              |            | yes |            |     |         |         |              |             |
| 721 | <a href="#">NX_Q8NCU1</a> | Uncharacterized protein CC    | CCDC197      | 14q32.12   |       |          |            |              |            | yes |            |     |         |         |              |             |

Supplementary Table 2: Evidence for the 950 non-MS-based PE1 neXtProt Proteins (ordered by neXtProt accession code, Column A, for 906 with data)

|     | A                         | B                            | C            | D          | E     | F        | G          | H            | I          | J   | K          | L   | M       | N       |              |             |
|-----|---------------------------|------------------------------|--------------|------------|-------|----------|------------|--------------|------------|-----|------------|-----|---------|---------|--------------|-------------|
| 1   | accession code            | protein name                 | gene name(s) | chromosome | Edman | textbook | Disease mu | 3D structure | SP curated | PPI | IntAct PPI | GOL | Exp PTM | Ab info | Exp function | mutagenesis |
| 722 | <a href="#">NX_Q8N4L8</a> | Coiled-coil domain-contains  | CCDC24       | 1p34.1     |       |          |            |              |            |     | yes        |     |         |         |              |             |
| 723 | <a href="#">NX_Q6NSX1</a> | Coiled-coil domain-contains  | CCDC70       | 13q14.3    |       |          |            |              |            |     | yes        |     |         |         |              |             |
| 724 | <a href="#">NX_P51685</a> | C-C chemokine receptor typ   | CCR8         | 3p22.1     |       |          |            |              |            |     |            |     |         |         | yes          |             |
| 725 | <a href="#">NX_P51861</a> | Cerebellar degeneration-rela | CDR1         | Xq27.1     |       |          |            |              |            |     | yes        |     |         |         |              |             |
| 726 | <a href="#">NX_Q8N9R6</a> | CMT1A duplicated region tra  | CDRT4        | 17p12      |       |          |            |              |            |     | yes        |     |         |         |              |             |
| 727 | <a href="#">NX_O14627</a> | Homeobox protein CDX-4       | CDX4         | Xq13.2     |       |          |            |              |            |     | yes        |     |         |         |              |             |
| 728 | <a href="#">NX_Q494W8</a> | CHRNA7-FAM7A fusion pro      | CHRFAM7A     | 15q13.2    |       |          |            |              |            |     | yes        |     |         |         |              |             |
| 729 | <a href="#">NX_Q9Y6N3</a> | Calcium-activated chloride c | CLCA3P       | 1p22.3     |       |          |            |              |            |     |            | yes |         |         |              |             |
| 730 | <a href="#">NX_G9CGD6</a> | CNK3/IPCEF1 fusion protei    | CNK3/IPCEF1  | 6q25.2     |       |          |            |              |            |     |            |     |         |         | yes          |             |
| 731 | <a href="#">NX_Q6YFQ2</a> | Cytochrome c oxidase subu    | COX6B2       | 19q13.42   |       |          |            |              |            |     | yes        |     |         |         |              |             |
| 732 | <a href="#">NX_Q8NHU0</a> | Cancer/testis antigen family | CT45A3       | Xq26.3     |       |          |            |              |            |     | yes        |     |         |         |              |             |
| 733 | <a href="#">NX_P0DPQ6</a> | DDIT3 upstream open readi    | DDIT3        | 12q13.3    |       |          |            |              | yes        |     |            |     |         |         |              |             |
| 734 | <a href="#">NX_Q5J5C9</a> | Beta-defensin 121            | DEFB121      | 20q11.21   |       |          |            |              |            |     | yes        |     |         |         |              |             |
| 735 | <a href="#">NX_Q6ZPD8</a> | Diacylglycerol O-acyltransfe | DGAT2L6      | Xq13.1     |       |          |            |              |            |     |            |     |         |         | yes          |             |
| 736 | <a href="#">NX_O95661</a> | GTP-binding protein Di-Ras:  | DIRAS3       | 1p31.3     |       |          |            |              |            |     | yes        |     |         |         |              |             |
| 737 | <a href="#">NX_Q96T75</a> | Down syndrome critical regi  | DSCR8        | 21q22.13   |       |          |            |              |            |     | yes        |     |         |         |              |             |
| 738 | <a href="#">NX_B3EWF7</a> | Laforin, isoform 9           | EPM2A        | 6q24.3     |       |          |            |              | yes        |     |            |     |         |         |              |             |
| 739 | <a href="#">NX_P60507</a> | Endogenous retrovirus grou   | ERVFC1       | Xq21.33    |       |          |            |              |            |     |            |     |         |         | yes          |             |
| 740 | <a href="#">NX_P60608</a> | Endogenous retrovirus grou   | ERVFC1-1     | 7q36.2     |       |          |            |              |            |     |            |     |         |         | yes          |             |
| 741 | <a href="#">NX_P87889</a> | Endogenous retrovirus grou   | ERVK-10      | 5q33.3     |       |          |            |              |            |     |            |     |         |         | yes          |             |
| 742 | <a href="#">NX_O42043</a> | Endogenous retrovirus grou   | ERVK-18      | 1q23.3     |       |          |            |              |            |     |            |     |         |         | yes          |             |
| 743 | <a href="#">NX_O71037</a> | Endogenous retrovirus grou   | ERVK-19      | 19q11      |       |          |            |              |            |     |            |     |         |         | yes          |             |
| 744 | <a href="#">NX_Q9YNA8</a> | Endogenous retrovirus grou   | ERVK-19      | 19q12      |       |          |            |              |            |     |            |     |         |         | yes          |             |
| 745 | <a href="#">NX_P61565</a> | Endogenous retrovirus grou   | ERVK-21      | 12q14.1    |       |          |            |              |            |     |            |     |         |         | yes          |             |
| 746 | <a href="#">NX_P62683</a> | Endogenous retrovirus grou   | ERVK-21      | 12q14.1    |       |          |            |              |            |     |            |     |         |         | yes          |             |
| 747 | <a href="#">NX_P61581</a> | Endogenous retrovirus grou   | ERVK-24      | 22q11.21   |       |          |            |              |            |     |            |     |         |         | yes          |             |
| 748 | <a href="#">NX_P63145</a> | Endogenous retrovirus grou   | ERVK-24      | 22q11.21   |       |          |            |              |            |     |            |     |         |         | yes          |             |
| 749 | <a href="#">NX_Q69384</a> | Endogenous retrovirus grou   | ERVK-6       | 7p22.1     |       |          |            |              |            |     |            |     |         |         | yes          |             |
| 750 | <a href="#">NX_Q7LDI9</a> | Endogenous retrovirus grou   | ERVK-6       | 7p22.1     |       |          |            |              |            |     |            |     |         |         | yes          |             |
| 751 | <a href="#">NX_P62685</a> | Endogenous retrovirus grou   | ERVK-8       | 8p23.1     |       |          |            |              |            |     |            |     |         |         | yes          |             |
| 752 | <a href="#">NX_Q902F8</a> | Endogenous retrovirus grou   | ERVK-8       | 8p23.1     |       |          |            |              |            |     |            |     |         |         | yes          |             |
| 753 | <a href="#">NX_P63126</a> | Endogenous retrovirus grou   | ERVK-9       | 6q14.1     |       |          |            |              |            |     |            |     |         |         | yes          |             |
| 754 | <a href="#">NX_Q9UKH3</a> | Endogenous retrovirus grou   | ERVK-9       | 6q14.1     |       |          |            |              |            |     |            |     |         |         | yes          |             |
| 755 | <a href="#">NX_Q8N2X6</a> | Uncharacterized protein EX   | EXOC3-AS1    | 5p15.33    |       |          |            |              |            |     | yes        |     |         |         |              |             |
| 756 | <a href="#">NX_Q96AQ9</a> | Protein FAM131C              | FAM131C      | 1p36.13    |       |          |            |              |            |     | yes        |     |         |         |              |             |
| 757 | <a href="#">NX_A6NMN3</a> | Protein FAM170B              | FAM170B      | 10q11.23   |       |          |            |              | yes        |     |            |     |         |         |              |             |
| 758 | <a href="#">NX_Q96MZ4</a> | Protein FAM218A              | FAM218A      | 4q32.3     |       |          |            |              |            |     | yes        |     |         |         |              |             |
| 759 | <a href="#">NX_Q08E93</a> | Protein FAM27E3              | FAM27E3      | 9q21.11    |       |          |            |              |            |     | yes        |     |         |         |              |             |
| 760 | <a href="#">NX_Q6NXP2</a> | Protein FAM71F2              | FAM71F2      | 7q32.1     |       |          |            |              |            |     | yes        |     |         |         |              |             |
| 761 | <a href="#">NX_Q5RGS3</a> | Protein FAM74A1              | FAM74A1      | 9p12       |       |          |            |              |            |     | yes        |     |         |         |              |             |

Supplementary Table 2: Evidence for the 950 non-MS-based PE1 neXtProt Proteins (ordered by neXtProt accession code, Column A, for 906 with data)

|     | A                             | B                                                            | C                                                                                                                                                                                      | D            | E     | F        | G          | H            | I          | J   | K      | L       | M       | N       |              |             |
|-----|-------------------------------|--------------------------------------------------------------|----------------------------------------------------------------------------------------------------------------------------------------------------------------------------------------|--------------|-------|----------|------------|--------------|------------|-----|--------|---------|---------|---------|--------------|-------------|
| 1   | accession code                | protein name                                                 | gene name(s)                                                                                                                                                                           | chromosome   | Edman | textbook | Disease mu | 3D structure | SP curated | PPI | IntAct | PPI GOL | Exp PTM | Ab info | Exp function | mutagenesis |
| 762 | <a href="#">NX_Q5TZK3</a>     | Protein FAM74A4/A6                                           | FAM74A4, FAM74A6                                                                                                                                                                       | 9q12         |       |          |            |              |            |     | yes    |         |         |         |              |             |
| 763 | <a href="#">NX_P0C5J1</a>     | Putative protein N-methyltransferase 1                       | FAM86B2                                                                                                                                                                                | 8p23.1       |       |          |            |              | yes        |     |        |         |         |         |              |             |
| 764 | <a href="#">NX_Q86YD7</a>     | Protein FAM90A1                                              | FAM90A1                                                                                                                                                                                | 12p13.31     |       |          |            |              |            |     | yes    |         |         |         |              |             |
| 765 | <a href="#">NX_Q8IZU0</a>     | Protein FAM9B                                                | FAM9B                                                                                                                                                                                  | Xp22.31      |       |          |            |              |            |     | yes    |         |         |         |              |             |
| 766 | <a href="#">NX_Q96RJ6</a>     | Fer3-like protein                                            | FERD3L                                                                                                                                                                                 | 7p21.1       |       |          |            |              |            |     | yes    |         |         |         |              |             |
| 767 | <a href="#">NX_Q96Q35</a>     | Flagellum-associated coiled-coil protein 1                   | FLACC1                                                                                                                                                                                 | 2q33.1       |       |          |            |              |            |     | yes    |         |         |         |              |             |
| 768 | <a href="#">NX_Q3SYB3</a>     | Forkhead box protein D4-like 1                               | FOXD4L6                                                                                                                                                                                | 9p11.2       |       |          |            |              |            |     | yes    |         |         |         |              |             |
| 769 | <a href="#">NX_A0A2Z4LIS9</a> | Forkhead box protein O3B                                     | FOXO3B                                                                                                                                                                                 | 17p11.2      |       |          |            |              |            |     |        | yes     |         |         |              |             |
| 770 | <a href="#">NX_Q6PIV2</a>     | Forkhead box protein R1                                      | FOXR1                                                                                                                                                                                  | 11q23.3      |       |          |            |              |            |     | yes    |         |         |         |              |             |
| 771 | <a href="#">NX_A1L429</a>     | G antigen 12B/C/D/E                                          | GAGE12B, GAGE12C, GAGE12D, GAGE12E                                                                                                                                                     | Xp11.23      |       |          |            |              |            |     | yes    |         |         |         |              |             |
| 772 | <a href="#">NX_P0CL80</a>     | G antigen 12F                                                | GAGE12F                                                                                                                                                                                | Xp11.23      |       |          |            |              |            |     | yes    |         |         |         |              |             |
| 773 | <a href="#">NX_P0CL81</a>     | G antigen 12G                                                | GAGE12G                                                                                                                                                                                | Xp11.23      |       |          |            |              |            |     | yes    |         |         |         |              |             |
| 774 | <a href="#">NX_Q9UEU5</a>     | G antigen 2D                                                 | GAGE2D, GAGE2E, GAGE2F, GAGE2G, GAGE2H, GAGE2I, GAGE2J, GAGE2K, GAGE2L, GAGE2M, GAGE2N, GAGE2O, GAGE2P, GAGE2Q, GAGE2R, GAGE2S, GAGE2T, GAGE2U, GAGE2V, GAGE2W, GAGE2X, GAGE2Y, GAGE2Z | Xp11.23      |       |          |            |              |            |     | yes    |         |         |         |              |             |
| 775 | <a href="#">NX_Q13069</a>     | G antigen 5                                                  | GAGE5                                                                                                                                                                                  | Xp11.2-p11.4 |       |          |            |              |            |     | yes    |         |         |         |              |             |
| 776 | <a href="#">NX_Q13070</a>     | G antigen 6                                                  | GAGE6                                                                                                                                                                                  | Xp11.2-p11.4 |       |          |            |              |            |     | yes    |         |         |         |              |             |
| 777 | <a href="#">NX_O60755</a>     | Galanin receptor type 3                                      | GALR3                                                                                                                                                                                  | 22q13.1      |       |          |            |              |            |     |        |         |         |         | yes          |             |
| 778 | <a href="#">NX_P09565</a>     | Putative insulin-like growth factor receptor 1               | GIG44, PP9974                                                                                                                                                                          | 11p15.5      |       |          |            |              |            |     | yes    |         |         |         |              |             |
| 779 | <a href="#">NX_A6NEM1</a>     | Golgin subfamily A member 9                                  | GOLGA6L9                                                                                                                                                                               | 15q25.2      |       |          |            |              |            |     | yes    |         |         |         |              |             |
| 780 | <a href="#">NX_P46091</a>     | G-protein coupled receptor 1                                 | GPR1                                                                                                                                                                                   | 2q33.3       |       |          |            |              |            |     |        |         |         |         | yes          |             |
| 781 | <a href="#">NX_Q8TDV5</a>     | Glucose-dependent insulin-inducible polypeptide 1            | GPR119                                                                                                                                                                                 | Xq26.1       |       |          |            |              |            |     |        |         |         |         | yes          |             |
| 782 | <a href="#">NX_Q9Y2T6</a>     | G-protein coupled receptor 5                                 | GPR55                                                                                                                                                                                  | 2q37.1       |       |          |            |              |            |     |        |         |         |         | yes          |             |
| 783 | <a href="#">NX_Q9NZD1</a>     | G-protein coupled receptor family C member 5D                | GPRC5D                                                                                                                                                                                 | 12p13.1      |       |          |            |              |            |     | yes    |         |         |         |              |             |
| 784 | <a href="#">NX_Q86UP8</a>     | General transcription factor 2                               | GTF2IRD2                                                                                                                                                                               | 7q11.23      |       |          |            |              |            |     | yes    |         |         |         |              |             |
| 785 | <a href="#">NX_P62684</a>     | Endogenous retrovirus group 1 element 1                      | HERVK_113                                                                                                                                                                              | 19p13.11     |       |          |            |              |            |     |        |         |         |         | yes          |             |
| 786 | <a href="#">NX_Q902F9</a>     | Endogenous retrovirus group 1 element 2                      | HERVK_113                                                                                                                                                                              | 19p13.11     |       |          |            |              |            |     |        |         |         |         | yes          |             |
| 787 | <a href="#">NX_Q9XRX5</a>     | HERV-H LTR-associating protein 1                             | HHLA3                                                                                                                                                                                  | 1p31.1       |       |          |            |              |            |     | yes    |         |         |         |              |             |
| 788 | <a href="#">NX_P60008</a>     | Spermatid-specific linker histone 1                          | HILS1                                                                                                                                                                                  | 17q21.33     |       |          |            |              |            |     |        |         |         |         | yes          |             |
| 789 | <a href="#">NX_Q9Y5N1</a>     | Histamine H3 receptor                                        | HRH3                                                                                                                                                                                   | 20q13.33     |       |          |            |              |            |     |        |         |         |         | yes          |             |
| 790 | <a href="#">NX_Q9Y278</a>     | Heparan sulfate glucosaminyltransferase 2                    | HS3ST2                                                                                                                                                                                 | 16p12.2      |       |          |            |              |            |     |        |         |         |         | yes          |             |
| 791 | <a href="#">NX_Q96QI5</a>     | Heparan sulfate glucosaminyltransferase 6                    | HS3ST6                                                                                                                                                                                 | 16p13.3      |       |          |            |              |            |     |        |         |         |         | yes          |             |
| 792 | <a href="#">NX_Q9BQS6</a>     | Heat shock protein beta-9                                    | HSPB9                                                                                                                                                                                  | 17q21.2      |       |          |            |              |            |     | yes    |         |         |         |              |             |
| 793 | <a href="#">NX_Q5T764</a>     | Interferon-induced protein with tetratricopeptide repeats 1B | IFIT1B                                                                                                                                                                                 | 10q23.31     |       |          |            |              |            |     | yes    |         |         |         |              |             |
| 794 | <a href="#">NX_Q9NTI7</a>     | PAK4-inhibitor INKA2                                         | INKA2                                                                                                                                                                                  | 1p13.2       |       |          |            |              | yes        |     |        |         |         |         |              |             |
| 795 | <a href="#">NX_Q8IXL9</a>     | IQ domain-containing protein 2                               | IQCF2                                                                                                                                                                                  | 3p21.2       |       |          |            |              |            |     | yes    |         |         |         |              |             |
| 796 | <a href="#">NX_Q9H252</a>     | Potassium voltage-gated channel subfamily H member 6         | KCNH6                                                                                                                                                                                  | 17q23.3      |       |          |            |              |            |     |        | yes     |         |         |              |             |
| 797 | <a href="#">NX_Q9HB15</a>     | Potassium channel subfamily K member 12                      | KCNK12                                                                                                                                                                                 | 2p16.3       |       |          |            |              |            |     |        |         | yes     |         |              |             |
| 798 | <a href="#">NX_Q9ULS6</a>     | Potassium voltage-gated channel subfamily S member 2         | KCNS2                                                                                                                                                                                  | 8q22.2       |       |          |            |              |            |     | yes    |         |         |         |              |             |
| 799 | <a href="#">NX_Q8IYD2</a>     | Kelch domain-containing protein 8A                           | KLHDC8A                                                                                                                                                                                | 1q32.1       |       |          |            |              |            |     | yes    |         |         |         |              |             |
| 800 | <a href="#">NX_Q6PF15</a>     | Kelch-like protein 35                                        | KLHL35                                                                                                                                                                                 | 11q13.4      |       |          |            |              |            |     | yes    |         |         |         |              |             |
| 801 | <a href="#">NX_Q2WVGJ6</a>    | Kelch-like protein 38                                        | KLHL38                                                                                                                                                                                 | 8q24.13      |       |          |            |              |            |     | yes    |         |         |         |              | yes         |

Supplementary Table 2: Evidence for the 950 non-MS-based PE1 neXtProt Proteins (ordered by neXtProt accession code, Column A, for 906 with data)

|     | A                         | B                              | C              | D                 | E     | F        | G          | H            | I              | J          | K   | L       | M       | N            |             |
|-----|---------------------------|--------------------------------|----------------|-------------------|-------|----------|------------|--------------|----------------|------------|-----|---------|---------|--------------|-------------|
| 1   | accession code            | protein name                   | gene name(s)   | chromosome        | Edman | textbook | Disease mu | 3D structure | SP curated PPI | IntAct PPI | GOL | Exp PTM | Ab info | Exp function | mutagenesis |
| 802 | <a href="#">NX_B2CW77</a> | Killin                         | KLLN           | 10q23.31          |       |          |            |              |                |            |     |         |         | yes          |             |
| 803 | <a href="#">NX_Q7Z3Y9</a> | Keratin, type I cytoskeletal 2 | KRT26          | 17q21.2           |       |          |            |              |                |            |     |         | yes     |              |             |
| 804 | <a href="#">NX_Q3SY46</a> | Keratin-associated protein 1   | KRTAP13-3      | 21q22.11          |       |          |            |              |                | yes        |     |         |         |              |             |
| 805 | <a href="#">NX_P0C7H8</a> | Keratin-associated protein 2   | KRTAP2-3       | 17q21.2           |       |          |            |              |                | yes        |     |         |         |              |             |
| 806 | <a href="#">NX_Q9BYR9</a> | Keratin-associated protein 2   | KRTAP2-4       | 17q21.2           |       |          |            |              |                | yes        |     |         |         |              |             |
| 807 | <a href="#">NX_Q8NBH2</a> | Kyphoscoliosis peptidase       | KY             | 3q22.2            |       |          |            |              | yes            |            |     |         |         |              |             |
| 808 | <a href="#">NX_Q6JVE6</a> | Epididymal-specific lipocalin  | LCN10          | 9q34.3            |       |          |            |              |                |            |     |         |         | yes          |             |
| 809 | <a href="#">NX_P62502</a> | Epididymal-specific lipocalin  | LCN6           | 9q34.3            |       |          |            |              |                |            |     |         |         | yes          |             |
| 810 | <a href="#">NX_Q3B8N2</a> | Galectin-9B                    | LGALS9B        | 17p11.2           |       |          |            |              |                | yes        |     |         |         |              |             |
| 811 | <a href="#">NX_Q6DKI2</a> | Galectin-9C                    | LGALS9C        | 17p11.2           |       |          |            |              |                | yes        |     |         |         |              |             |
| 812 | <a href="#">NX_Q9UPM6</a> | LIM/homeobox protein Lhx6      | LHX6           | 9q33.2            |       |          |            |              |                | yes        |     |         |         |              |             |
| 813 | <a href="#">NX_P0CW20</a> | LIM and senescent cell antiç   | LIMS4          | 2q13              |       |          |            |              |                | yes        |     |         |         |              |             |
| 814 | <a href="#">NX_Q96MT4</a> | Uncharacterized protein enc    | LINC01600      | 6p25.2            |       |          |            |              |                | yes        |     |         |         |              |             |
| 815 | <a href="#">NX_Q8TE12</a> | LIM homeobox transcription     | LMX1A          | 1q23.3            |       |          |            |              |                | yes        |     |         |         |              |             |
| 816 | <a href="#">NX_Q8N112</a> | Leucine-rich single-pass me    | LSMEM2         | 3p21.31           |       |          |            |              |                | yes        |     |         |         |              |             |
| 817 | <a href="#">NX_Q8N8X9</a> | Protein mab-21-like 3          | MAB21L3        | 1p13.1            |       |          |            |              |                | yes        |     |         |         |              |             |
| 818 | <a href="#">NX_Q8N6F8</a> | Methyltransferase-like protei  | METTTL27       | 7q11.23           |       |          |            |              |                | yes        |     |         |         |              |             |
| 819 | <a href="#">NX_E2RYF6</a> | Mucin-22                       | MUC22          | 6p21.33           |       |          |            |              |                |            |     |         | yes     |              |             |
| 820 | <a href="#">NX_E9PQ53</a> | NADH dehydrogenase [ubiq       | NDUFC2-KCTD1   | 11q14.1           |       |          |            |              | yes            |            |     |         |         |              |             |
| 821 | <a href="#">NX_Q9HD90</a> | Neurogenic differentiation fa  | NEUROD4        | 12q13.2           |       |          |            |              |                | yes        |     |         |         |              |             |
| 822 | <a href="#">NX_P48145</a> | Neuropeptides B/W receptor     | NPBWR1         | 8q11.23           |       |          |            |              |                |            |     |         |         | yes          |             |
| 823 | <a href="#">NX_Q9Y5X5</a> | Neuropeptide FF receptor 2     | NPFFR2         | 4q13.3            |       |          |            |              |                |            |     |         |         | yes          |             |
| 824 | <a href="#">NX_E9PJ15</a> | Nuclear pore complex-intera    | NPIPA7         | 16p13.11          |       |          |            |              |                | yes        |     |         |         |              |             |
| 825 | <a href="#">NX_Q8WWG1</a> | Pro-neuregulin-4, membranç     | NRG4           | 15q24.2           |       |          |            |              |                | yes        |     |         |         |              |             |
| 826 | <a href="#">NX_Q96DL1</a> | NXPE family member 2           | NXPE2          | 11q23.3           |       |          |            |              |                | yes        |     |         |         |              |             |
| 827 | <a href="#">NX_Q6U736</a> | Opsin-5                        | OPN5           | 6p12.3            |       |          |            |              |                |            | yes |         |         |              |             |
| 828 | <a href="#">NX_P47884</a> | Olfactory receptor 1D4         | OR1D4          | 17p13.3           |       |          |            |              |                | yes        |     |         |         |              |             |
| 829 | <a href="#">NX_Q9H205</a> | Olfactory receptor 2AG1        | OR2AG1         | 11p15.4           |       |          |            |              |                | yes        |     |         |         |              |             |
| 830 | <a href="#">NX_Q5JUK9</a> | P antigen family member 3      | PAGE3          | Xp11.21           |       |          |            |              |                | yes        |     |         |         |              |             |
| 831 | <a href="#">NX_Q07326</a> | Phosphatidylinositol-glycan I  | PIGF           | 2p21              |       |          |            |              | yes            |            |     |         |         |              |             |
| 832 | <a href="#">NX_Q9BZM2</a> | Group IIF secretory phospho    | PLA2G2F        | 1p36.12           |       |          |            |              |                |            |     |         |         | yes          |             |
| 833 | <a href="#">NX_Q6S545</a> | POTE ankyrin domain family     | POTEH          | 22q11.1           |       |          |            |              |                | yes        |     |         |         |              |             |
| 834 | <a href="#">NX_Q9NQW5</a> | Probable histone-lysine N-m    | PRDM7          | 16q24.3           |       |          |            |              |                | yes        |     |         |         |              |             |
| 835 | <a href="#">NX_F7VJQ1</a> | Alternative prion protein      | PRNP           | 20p13             |       |          |            |              |                |            |     |         | yes     |              |             |
| 836 | <a href="#">NX_A6NJB7</a> | Proline-rich protein 19        | PRR19          | 19q13.2           |       |          |            |              |                | yes        |     |         |         |              |             |
| 837 | <a href="#">NX_P86479</a> | Proline-rich protein 20C       | PRR20C         | 13q21.1           |       |          |            |              |                | yes        |     |         |         |              |             |
| 838 | <a href="#">NX_P86480</a> | Proline-rich protein 20D       | PRR20D         | 13q21.1           |       |          |            |              |                | yes        |     |         |         |              |             |
| 839 | <a href="#">NX_P86478</a> | Proline-rich protein 20E       | PRR20E         | 13q21.1           |       |          |            |              |                | yes        |     |         |         |              |             |
| 840 | <a href="#">NX_Q9NV39</a> | Proline-rich protein 34        | PRR34          | 22q13.31          |       |          |            |              |                | yes        |     |         |         |              |             |
| 841 | <a href="#">NX_O14603</a> | PTPN13-like protein, Y-link    | PRY, PRY2, PRY | Yq11.23, Yq11.223 |       |          |            |              |                |            |     |         | yes     |              |             |

Supplementary Table 2: Evidence for the 950 non-MS-based PE1 neXtProt Proteins (ordered by neXtProt accession code, Column A, for 906 with data)

|     | A                         | B                                       | C            | D          | E     | F        | G          | H            | I          | J   | K          | L   | M       | N       |              |             |
|-----|---------------------------|-----------------------------------------|--------------|------------|-------|----------|------------|--------------|------------|-----|------------|-----|---------|---------|--------------|-------------|
| 1   | accession code            | protein name                            | gene name(s) | chromosome | Edman | textbook | Disease mu | 3D structure | SP curated | PPI | IntAct PPI | GOL | Exp PTM | Ab info | Exp function | mutagenesis |
| 842 | <a href="#">NX_Q96QS6</a> | Serine/threonine-protein kinase         | PSKH2        | 8q21.3     |       |          |            |              |            |     | yes        |     |         |         |              |             |
| 843 | <a href="#">NX_Q9UBK7</a> | Rab-like protein 2A                     | RABL2A       | 2q14.1     |       |          |            |              |            |     | yes        |     |         |         |              |             |
| 844 | <a href="#">NX_A6NJZ7</a> | RIMS-binding protein 3C                 | RIMBP3C      | 22q11.21   |       |          |            |              | yes        |     |            |     |         |         |              |             |
| 845 | <a href="#">NX_Q0D2K3</a> | Protein ripply1                         | RIPPLY1      | Xq22.3     |       |          |            |              |            |     | yes        |     |         |         |              |             |
| 846 | <a href="#">NX_Q5TAB7</a> | Protein ripply2                         | RIPPLY2      | 6q14.2     |       |          |            |              |            |     | yes        |     |         |         |              |             |
| 847 | <a href="#">NX_Q8TDE3</a> | Ribonuclease 8                          | RNASE8       | 14q11.2    |       |          |            |              |            |     |            |     |         |         | yes          |             |
| 848 | <a href="#">NX_Q8N4F7</a> | RING finger protein 175                 | RNF175       | 4q31.3     |       |          |            |              |            |     | yes        |     |         |         |              |             |
| 849 | <a href="#">NX_Q9H0X6</a> | RING finger protein 208                 | RNF208       | 9q34.3     |       |          |            |              |            |     | yes        |     |         |         |              |             |
| 850 | <a href="#">NX_Q5QGT7</a> | Receptor-transporting protein RTP2      | RTP2         | 3q27.3     |       |          |            |              |            |     | yes        |     |         |         |              |             |
| 851 | <a href="#">NX_Q14D33</a> | Receptor-transporting protein RTP5      | RTP5         | 2q37.3     |       |          |            |              |            |     | yes        |     |         |         |              |             |
| 852 | <a href="#">NX_Q9NSD7</a> | Relaxin-3 receptor 1                    | RXFP3        | 5p13.2     |       |          |            |              |            |     |            |     |         |         | yes          |             |
| 853 | <a href="#">NX_Q5SY68</a> | Protein S100-A7-like 2                  | S100A7L2     | 1q21.3     |       |          |            |              |            |     | yes        |     |         |         |              |             |
| 854 | <a href="#">NX_Q5TGI4</a> | Sterile alpha motif domain-containing   | SAMD5        | 6q24.3     |       |          |            |              |            |     |            | yes |         |         |              |             |
| 855 | <a href="#">NX_Q8N6R1</a> | Stress-associated endoplasmic reticulum | SERP2        | 13q14.11   |       |          |            |              |            |     | yes        |     |         |         |              |             |
| 856 | <a href="#">NX_Q86WD7</a> | Serpin A9                               | SERPINA9     | 14q32.13   |       |          |            |              |            |     |            |     |         |         | yes          |             |
| 857 | <a href="#">NX_Q8IWX5</a> | Sphingosine-1-phosphate phosphatase     | SGPP2        | 2q36.1     |       |          |            |              |            |     |            |     |         |         | yes          |             |
| 858 | <a href="#">NX_A6NIM6</a> | Solute carrier family 15 member         | SLC15A5      | 12p12.3    |       |          |            |              |            |     | yes        |     |         |         |              |             |
| 859 | <a href="#">NX_Q6ZT89</a> | Solute carrier family 25 member         | SLC25A48     | 5q31.1     |       |          |            |              |            |     | yes        |     |         |         |              |             |
| 860 | <a href="#">NX_Q9NRQ5</a> | Single-pass membrane and                | SMCO4        | 11q21      |       |          |            |              |            |     | yes        |     |         |         |              |             |
| 861 | <a href="#">NX_Q9BVW6</a> | Small integral membrane protein         | SMIM2        | 13q14.11   |       |          |            |              |            |     | yes        |     |         |         |              |             |
| 862 | <a href="#">NX_Q9BZL3</a> | Small integral membrane protein         | SMIM3        | 5q33.1     |       |          |            |              |            |     | yes        |     |         |         |              |             |
| 863 | <a href="#">NX_Q9NSN8</a> | Gamma-1-syntrophin                      | SNTG1        | 8q11.21    |       |          |            |              | yes        |     |            |     |         |         |              |             |
| 864 | <a href="#">NX_Q5T0L3</a> | Spermatogenesis-associated              | SPATA46      | 1q23.3     |       |          |            |              |            |     | yes        |     |         |         |              |             |
| 865 | <a href="#">NX_Q6RVD6</a> | Spermatogenesis-associated              | SPATA8       | 15q26.2    |       |          |            |              |            |     | yes        |     |         |         |              |             |
| 866 | <a href="#">NX_Q495Y8</a> | Speedy protein E2                       | SPDYE2       | 7q22.1     |       |          |            |              |            |     | yes        |     |         |         |              |             |
| 867 | <a href="#">NX_Q9BXX8</a> | Spermatogenic leucine zipper            | SPZ1         | 5q14.1     |       |          |            |              |            |     | yes        |     |         |         |              |             |
| 868 | <a href="#">NX_Q8IWL8</a> | Saitohin                                | STH          | 17q21.31   |       |          |            |              | yes        |     |            |     |         |         |              |             |
| 869 | <a href="#">NX_Q16559</a> | T-cell acute lymphocytic leukemia       | TAL2         | 9q31.2     |       |          |            |              |            |     | yes        |     |         |         |              |             |
| 870 | <a href="#">NX_Q9NYW7</a> | Taste receptor type 2 member            | TAS2R1       | 5p15.31    |       |          |            |              |            |     |            |     |         |         | yes          |             |
| 871 | <a href="#">NX_Q9NYW0</a> | Taste receptor type 2 member            | TAS2R10      | 12p13.2    |       |          |            |              |            |     |            |     |         |         | yes          |             |
| 872 | <a href="#">NX_Q9NYV9</a> | Taste receptor type 2 member            | TAS2R13      | 12p13.2    |       |          |            |              |            |     |            |     |         |         | yes          |             |
| 873 | <a href="#">NX_Q9NYV8</a> | Taste receptor type 2 member            | TAS2R14      | 12p13.2    |       |          |            |              |            |     | yes        |     |         |         |              |             |
| 874 | <a href="#">NX_Q9NYW5</a> | Taste receptor type 2 member            | TAS2R4       | 7q34       |       |          |            |              |            |     |            |     |         |         | yes          |             |
| 875 | <a href="#">NX_Q9NYW4</a> | Taste receptor type 2 member            | TAS2R5       | 7q34       |       |          |            |              |            |     |            |     |         |         | yes          |             |
| 876 | <a href="#">NX_Q9NYW3</a> | Taste receptor type 2 member            | TAS2R7       | 12p13.2    |       |          |            |              |            |     |            |     |         |         | yes          |             |
| 877 | <a href="#">NX_Q9NYW2</a> | Taste receptor type 2 member            | TAS2R8       | 12p13.2    |       |          |            |              |            |     |            |     |         |         | yes          |             |
| 878 | <a href="#">NX_Q6DHY5</a> | TBC1 domain family member               | TBC1D3G      | 17q12      |       |          |            |              |            |     | yes        |     |         |         |              |             |
| 879 | <a href="#">NX_Q6SJ96</a> | TATA box-binding protein-like           | TBPL2        | 14q22.3    |       |          |            |              |            |     |            | yes |         |         |              |             |
| 880 | <a href="#">NX_Q3Y452</a> | Testis development-related              | TDRG1        | 6p21.2     |       |          |            |              |            |     |            | yes |         |         |              |             |
| 881 | <a href="#">NX_Q9BXU2</a> | Testis-expressed protein 13             | TEX13B       | Xq22.3     |       |          |            |              |            |     | yes        |     |         |         |              |             |
