# Supplementary material
Source: PubMed Central journal article supplement (PMC7718309)
Supplement: NIHMS1644377-supplement-Suppl__Table_3.pdf [file NIHMS1644377-supplement-Suppl__Table_3.pdf]

Description of column headings for ST2 and ST3: A, neXtProt accession code; B, Ensembl Gene number; C, protein name; D, gene name; E, chromosomal location of the gene; then evidence curated by SwissProt/neXtProt: F, Edman degradation sequencing; G, use of textbook knowledge; H, disease mutation; I, 3D structure studies; J, SwissProt protein-protein interactions; K, IntAct protein-protein interactions (Gold); L, post-translational modifications; M, antibody studies; N, functional experiments; O, mutagenesis study; then from Human Protein Atlas (HPA v19): P, Tissue Atlas reliability score (enhanced/supported/approved/uncertain validation categories); Q, consensus RNA expression specificity (from HPA, GTEx, FANTOM5); R, consensus distribution; S, tissue enriched/tissue enhanced. The red highlighted rows are the difference between 950 total neXtProt entries and the 820 for which there is knowledge about which kinds of evidence were reviewed; presumably the other 130 are older results carried forward from UniProt/SwissProt.

ST3\_Human Protein Atlas IHC and mRNA Data Added to neXtProt Data (ST2) for 950 Non-MS-Based neXtProt PE1 Proteins  
(ordered alphabetically by tissue with highest expression, Column S)

|    | A                             | B                               | C                              | D                      | E          | F     | G        | H          | I            | J              | K              | L       | M       | N            | O           | P                                    | Q                          | R                      | S                                                                 |
|----|-------------------------------|---------------------------------|--------------------------------|------------------------|------------|-------|----------|------------|--------------|----------------|----------------|---------|---------|--------------|-------------|--------------------------------------|----------------------------|------------------------|-------------------------------------------------------------------|
| 1  | accession code                | Ensembl gene code               | protein name                   | gene name(s)           | chromosome | Edman | textbook | Disease mu | 3D structure | SP curated PPI | IntAct PPI GOL | Exp PTM | Ab info | Exp function | mutagenesis | Tissue Atlas reliability score HPA19 | Consensus RNA Specificity  | Consensus Distribution | Tissue(s) Most Enriched/Enhanced                                  |
| 2  | <a href="#">NX_Q96JQ5</a>     | ENSG00000110079                 | Membrane-spanning 4-dom        | MS4A4A                 | 11q12.2    |       |          |            |              |                |                |         |         | yes          |             | Approved                             | Tissue enhanced            | Detected in all        | adipose tissue                                                    |
| 3  | <a href="#">NX_Q8N895</a>     | ENSG00000178175                 | Zinc finger protein 366        | ZNF366                 | 5q13.2     |       |          |            |              | yes            |                |         |         | yes          | yes         | Uncertain                            | Tissue enhanced            | Detected in many       | adipose tissue                                                    |
| 4  | <a href="#">NX_Q8N895</a>     | ENSG00000284643                 | Small cysteine and glycine r   | SCYGR2                 | 2q36.3     |       |          |            |              |                |                |         |         |              |             | N/A                                  | Tissue enhanced            | Detected in single     | adipose tissue                                                    |
| 5  | <a href="#">NX_Q8TCY5</a>     | ENSG00000170262                 | Melanocortin-2 receptor acd    | MRAP                   | 21q22.11   |       |          |            |              | yes            |                |         |         | yes          |             | Uncertain                            | Group enriched             | Detected in some       | adipose tissue,adrenal gland,breast                               |
| 6  | <a href="#">NX_Q9BZL3</a>     | ENSG00000256235                 | Small integral membrane pr     | SMIM3                  | 5q33.1     |       |          |            |              |                |                |         |         |              |             | N/A                                  | Group enriched             | Detected in many       | adipose tissue,blood,bone marrow,pancreas                         |
| 7  | <a href="#">NX_O15529</a>     | ENSG00000126251                 | G-protein coupled receptor 4   | GPR42                  | 19q13.12   |       |          |            |              |                |                |         |         | yes          |             | Uncertain                            | Tissue enhanced            | Detected in some       | adipose tissue,blood,intestine                                    |
| 8  | <a href="#">NX_Q6LXV0</a>     | ENSG00000187871                 | GDNF family receptor alpha     | GFRAL                  | 6p12.1     |       |          | yes        | yes          |                |                | yes     |         | yes          |             | Uncertain                            | Tissue enhanced            | Detected in some       | adipose tissue,blood,liver                                        |
| 9  | <a href="#">NX_Q14843</a>     | ENSG00000185897                 | Free fatty acid receptor 3     | FFAR3                  | 19q13.12   |       |          |            |              |                |                |         |         | yes          |             | Uncertain                            | Tissue enhanced            | Detected in some       | adipose tissue,blood,lymphoid tissue                              |
| 10 | <a href="#">NX_A6NIM6</a>     | ENSG00000188991                 | Solute carrier family 15 men   | SLC15A5                | 12p12.3    |       |          |            |              |                |                |         |         |              | yes         | Uncertain                            | Group enriched             | Detected in some       | adipose tissue,brain,breast,testis                                |
| 11 | <a href="#">NX_Q9Y278</a>     | ENSG00000122254                 | Heparan sulfate glucosamin     | HS3ST2                 | 16p12.2    |       |          |            |              |                |                |         |         | yes          |             | Approved                             | Group enriched             | Detected in many       | adipose tissue,brain,lung                                         |
| 12 | <a href="#">NX_Q8TE60</a>     | ENSG00000140873                 | A disintegrin and metallopro   | ADAMTS18               | 16q23.1    |       |          | yes        |              |                |                |         |         |              |             | Uncertain                            | Group enriched             | Detected in some       | adipose tissue,brain,placenta                                     |
| 13 | <a href="#">NX_Q9Y264</a>     | ENSG00000101280                 | Angiotensin-converting enzy    | ANGPT4                 | 20p13      |       |          |            | yes          |                |                |         |         | yes          |             | Uncertain                            | Tissue enhanced            | Detected in many       | adipose tissue,breast,cervix, uterine                             |
| 14 | <a href="#">NX_Q96AQ7</a>     | ENSG00000187288                 | Cell death activator CIDE-3    | CIDE3                  | 3p25.3     |       |          |            | yes          |                |                |         |         | yes          |             | Approved                             | Group enriched             | Detected in many       | adipose tissue,breast,intestine                                   |
| 15 | <a href="#">NX_Q3KNW5</a>     | ENSG00000145283                 | Solute carrier family 10 men   | SLC10A6                | 4q21.3     |       |          |            |              |                |                | yes     |         | yes          |             | Enhanced                             | Tissue enhanced            | Detected in many       | adipose tissue,breast,skin 1                                      |
| 16 | <a href="#">NX_Q8TCW9</a>     | ENSG00000169618                 | Prokineticin receptor 1        | PROKR1                 | 2p13.3     |       |          |            |              |                |                |         | yes     | yes          |             | Uncertain                            | Tissue enhanced            | Detected in some       | adipose tissue,epididymis                                         |
| 17 | <a href="#">NX_Q9H295</a>     | ENSG00000164935                 | Dendritic cell-specific transr | DCSTAMP                | 8q22.3     |       |          |            | yes          |                |                |         |         | yes          |             | N/A                                  | Group enriched             | Detected in some       | adipose tissue,lung                                               |
| 18 | <a href="#">NX_Q86XSS</a>     | ENSG00000187151                 | Angiotensin-related protein    | ANGPTL5                | 11q22.1    |       |          |            |              |                |                |         |         |              |             | Uncertain                            | Tissue enhanced            | Detected in many       | adipose tissue,ovary                                              |
| 19 | <a href="#">NX_Q43320</a>     | ENSG00000196468                 | Fibroblast growth factor 16    | FGF16                  | Xq21.1     |       |          | yes        | yes          |                |                |         |         | yes          |             | N/A                                  | Tissue enhanced            | Detected in some       | adipose tissue,seminal vesicle                                    |
| 20 | <a href="#">NX_Q9HBY0</a>     | ENSG00000074771                 | NADPH oxidase 3                | NOX3                   | 6q25.3     |       |          |            | yes          |                |                |         |         | yes          |             | N/A                                  | Tissue enhanced            | Detected in single     | adrenal gland                                                     |
| 21 | <a href="#">NX_Q92847</a>     | ENSG00000121853                 | Growth hormone secretagog      | GHSR                   | 3q26.31    |       |          | yes        |              |                |                |         |         | yes          |             | N/A                                  | Tissue enhanced            | Detected in some       | adrenal gland,blood,pituitary gland                               |
| 22 | <a href="#">NX_Q9NPC2</a>     | ENSG00000169427                 | Potassium channel subfamil     | KCNK9                  | 8q24.3     |       |          | yes        | yes          |                |                |         |         | yes          |             | N/A                                  | Group enriched             | Detected in some       | adrenal gland,brain                                               |
| 23 | <a href="#">NX_Q8NEW7</a>     | ENSG00000181585                 | Transmembrane inner ear e      | TMEIE                  | 3p21.31    |       |          | yes        |              |                |                |         |         | yes          |             | Uncertain                            | Tissue enhanced            | Detected in many       | adrenal gland,brain                                               |
| 24 | <a href="#">NX_P49683</a>     | ENSG00000119973                 | Prolactin-releasing peptide r  | PRLHR                  | 10q26.11   |       |          |            | yes          |                |                |         |         | yes          |             | Enhanced                             | Tissue enhanced            | Detected in some       | adrenal gland,brain,cervix, uterine,pituitary gland,smooth muscle |
| 25 | <a href="#">NX_Q9HCX4</a>     | ENSG00000069018                 | Short transient receptor pot   | TRPC7                  | 5q31.1     |       |          |            | yes          |                |                | yes     |         |              |             | Uncertain                            | Tissue enhanced            | Detected in some       | adrenal gland,brain,intestine,kidney,pituitary gland,testis       |
| 26 | <a href="#">NX_P14616</a>     | ENSG00000027644                 | Insulin receptor-related prot  | INSRR                  | 1q23.1     |       |          |            | yes          |                |                |         |         | yes          |             | Uncertain                            | Tissue enhanced            | Detected in some       | adrenal gland,brain,kidney                                        |
| 27 | <a href="#">NX_Q9BXU9</a>     | ENSG00000183166                 | Calcium-binding protein 8      | CALN1                  | 7q11.22    |       |          |            |              |                |                |         |         |              |             | Approved                             | Tissue enhanced            | Detected in many       | adrenal gland,brain,lymphoid tissue                               |
| 28 | <a href="#">NX_Q9NSD7</a>     | ENSG00000182631                 | Relaxin-3 receptor 1           | RXF3                   | 5p13.2     |       |          |            |              |                |                |         |         | yes          |             | Uncertain                            | Group enriched             | Detected in some       | adrenal gland,brain,pancreas,pituitary gland                      |
| 29 | <a href="#">NX_P14416</a>     | ENSG00000149295                 | D(2) dopamine receptor         | DRD2                   | 11q23.2    |       |          | yes        | yes          |                |                |         |         | yes          |             | Supported                            | Group enriched             | Detected in many       | adrenal gland,brain,pituitary gland                               |
| 30 | <a href="#">NX_P47211</a>     | ENSG00000166573                 | Galanin receptor type 1        | GALR1                  | 18q23      |       |          |            |              |                |                |         |         | yes          |             | N/A                                  | Tissue enhanced            | Detected in some       | adrenal gland,brain,pituitary gland                               |
| 31 | <a href="#">NX_Q43763</a>     | ENSG00000115297                 | T-cell leukemia homeobox p     | TLX2                   | 2p13.1     |       |          |            | yes          |                |                |         |         |              |             | Uncertain                            | Tissue enhanced            | Detected in some       | adrenal gland,brain,retina                                        |
| 32 | <a href="#">NX_Q8N895</a>     | ENSG00000140015                 | Potassium voltage-gated ch     | KCNH5                  | 14q23.2    |       |          |            |              |                |                | yes     |         | yes          |             | Uncertain                            | Tissue enhanced            | Detected in some       | adrenal gland,brain,retina                                        |
| 33 | <a href="#">NX_Q8WU08</a>     | ENSG00000169302                 | Serine/threonine-protein kin   | STK32A                 | 5q32       |       |          | yes        |              |                |                | yes     |         |              |             | Uncertain                            | Tissue enhanced            | Detected in many       | adrenal gland,brain,retina                                        |
| 34 | <a href="#">NX_Q8HWS3</a>     | ENSG00000185002                 | DNA-binding protein RFX6       | RFX6                   | 6q22.1     |       |          | yes        |              |                |                |         | yes     | yes          | yes         | Approved                             | Tissue enhanced            | Detected in some       | adrenal gland,intestine,pancreas, stomach 1                       |
| 35 | <a href="#">NX_Q5T6X5</a>     | ENSG00000173612                 | G-protein coupled receptor     | GPRC6A                 | 6q22.1     |       |          |            | yes          |                |                | yes     |         | yes          |             | N/A                                  | Group enriched             | Detected in some       | adrenal gland,kidney,prostate,salivary gland                      |
| 36 | <a href="#">NX_P30926</a>     | ENSG00000117971                 | Neuronal acetylcholine rece    | CHRNB4                 | 15q25.1    |       |          | yes        | yes          |                |                |         |         | yes          |             | N/A                                  | Group enriched             | Detected in some       | adrenal gland,lymphoid tissue,retina,testis                       |
| 37 | <a href="#">NX_Q6V0L0</a>     | ENSG00000187553                 | Cytochrome P450 26C1           | CYP26C1                | 10q23.33   |       |          |            |              |                |                |         |         | yes          |             | N/A                                  | Tissue enhanced            | Detected in some       | adrenal gland,lymphoid tissue,testis                              |
| 38 | <a href="#">NX_Q16671</a>     | ENSG00000135409                 | Anti-Muellerian hormone typ    | AMHR2                  | 12q13.13   |       |          | yes        |              |                |                |         |         | yes          |             | N/A                                  | Tissue enhanced            | Detected in some       | adrenal gland,ovary,testis                                        |
| 39 | <a href="#">NX_Q01718</a>     | ENSG00000185231                 | Adrenocorticotropic hormon     | MC2R                   | 18p11.21   |       |          | yes        | yes          |                |                |         |         | yes          |             | Enhanced                             | Group enriched             | Detected in some       | adrenal gland,pituitary gland                                     |
| 40 | <a href="#">NX_P58418</a>     | ENSG00000163646                 | Clarin-1                       | CLRN1                  | 3q25.1     |       |          | yes        |              |                |                |         |         | yes          |             | Uncertain                            | Group enriched             | Detected in some       | adrenal gland,retina                                              |
| 41 | <a href="#">NX_Q5VT99</a>     | ENSG00000162494                 | Leucine-rich repeat-containi   | LRRRC38                | 1p36.21    |       |          |            | yes          |                |                |         |         | yes          |             | Approved                             | Tissue enhanced            | Detected in some       | adrenal gland,skeletal muscle                                     |
| 42 | <a href="#">NX_P55344</a>     | ENSG00000105370                 | Lens fiber membrane intrins    | LIM2                   | 19q13.41   |       |          | yes        |              |                |                |         |         | yes          |             | N/A                                  | Tissue enhanced            | Detected in some       | blood                                                             |
| 43 | <a href="#">NX_P05112</a>     | ENSG00000113520                 | Interleukin-4                  | IL4                    | 5q31.1     |       |          | yes        |              |                |                |         |         | yes          |             | Approved                             | Tissue enriched            | Detected in some       | blood                                                             |
| 44 | <a href="#">NX_Q9UBD3</a>     | ENSG00000143185                 | Cytokine SCM-1 beta            | XCL2                   | 1q24.2     |       |          | yes        |              |                |                |         |         | yes          |             | Approved                             | Tissue enhanced            | Detected in many       | blood                                                             |
| 45 | <a href="#">NX_Q9NV12</a>     | ENSG00000146859                 | Transmembrane protein 140      | TMEM140                | 7q33       |       |          |            |              |                |                |         |         |              |             | N/A                                  | Tissue enhanced            | Detected in all        | blood                                                             |
| 46 | <a href="#">NX_P51677</a>     | ENSG00000183625                 | C-C chemokine receptor typ     | CCR3                   | 3p21.31    |       |          |            | yes          |                |                |         |         | yes          |             | Uncertain                            | Tissue enriched            | Detected in many       | blood                                                             |
| 47 | <a href="#">NX_A1A4Y4</a>     | ENSG00000237693                 | Immunity-related GTPase fa     | IRGM                   | 5q33.1     |       |          |            |              |                |                |         | yes     | yes          |             | N/A                                  | Tissue enhanced            | Detected in some       | blood                                                             |
| 48 | <a href="#">NX_P49019</a>     | ENSG00000255398                 | Hydroxycarboxylic acid rece    | HCAR3                  | 12q24.31   |       |          |            |              |                |                |         |         | yes          |             | Approved                             | Tissue enhanced            | Detected in many       | blood                                                             |
| 49 | <a href="#">NX_Q723S9</a>     | ENSG00000264343                 | Notch homolog 2 N-termina      | NOTCH2NLA              | 1q21.1     |       |          |            | yes          |                |                |         |         | yes          |             | Uncertain                            | Tissue enhanced            | Detected in many       | blood                                                             |
| 50 | <a href="#">NX_Q9H205</a>     | ENSG00000279486                 | Olfactory receptor 2AG1        | OR2AG1                 | 11p15.4    |       |          |            |              |                |                |         |         | yes          |             | N/A                                  | Tissue enhanced            | Detected in single     | blood                                                             |
| 51 | <a href="#">NX_Q0A0B4J2D5</a> | ENSG00000280071                 | Glutamine amidotransferase     | GATD3B                 | 21p12      |       |          | yes        |              |                |                |         |         |              |             | Uncertain                            | Tissue enhanced            | Detected in many       | blood                                                             |
| 52 | <a href="#">NX_P13725</a>     | ENSG00000099985                 | Oncostatin-M                   | OSM                    | 22q12.2    |       |          | yes        |              |                |                |         |         | yes          |             | N/A                                  | Tissue enhanced            | Detected in many       | blood,bone marrow                                                 |
| 53 | <a href="#">NX_Q9HC23</a>     | ENSG00000163421                 | Prokineticin-2                 | PROK2                  | 3p13       |       |          | yes        |              |                |                |         |         | yes          |             | Approved                             | Tissue enhanced            | Detected in many       | blood,bone marrow                                                 |
| 54 | <a href="#">NX_A6NND4</a>     | ENSG00000171561                 | Olfactory receptor 2AT4        | OR2AT4                 | 11q13.4    |       |          |            |              |                |                |         | yes     | yes          |             | N/A                                  | Tissue enhanced            | Detected in some       | blood,bone marrow                                                 |
| 55 | <a href="#">NX_Q6LUXZ3</a>    | ENSG00000204345                 | CMRF35-like molecule 5         | CD300LD                | 17q25.1    |       |          |            | yes          |                |                |         |         | yes          |             | Uncertain                            | Tissue enhanced            | Detected in some       | blood,bone marrow                                                 |
| 56 | <a href="#">NX_Q8WVW9</a>     | ENSG00000074706                 | Interactor protein for cytohe  | IPCEF1                 | 6q25.2     |       |          | yes        | yes          |                |                |         |         |              |             | Enhanced                             | Group enriched             | Detected in many       | blood,bone marrow,brain,lymphoid tissue,thyroid gland             |
| 57 | <a href="#">NX_Q8TDU9</a>     | ENSG00000173080                 | Relaxin-3 receptor 2           | RXF4                   | 1q22       |       |          |            |              |                |                |         |         | yes          |             | N/A                                  | Group enriched             | Detected in some       | blood,bone marrow,intestine                                       |
| 58 | <a href="#">NX_Q8NHV4</a>     | ENSG00000276070                 | C-C motif chemokine 4-like     | CCL4L1, CCL4L2         | 11q22      |       |          |            | yes          |                |                |         |         | yes          |             | N/A                                  | Tissue enhanced            | Detected in many       | blood,bone marrow,lung                                            |
| 59 | <a href="#">NX_P59046</a>     | ENSG00000142405                 | NACHT, LRR and PYD dom         | NLRP12                 | 19q13.42   |       |          | yes        | yes          |                |                |         |         | yes          |             | Approved                             | Group enriched             | Detected in many       | blood,bone marrow,lung,lymphoid tissue                            |
| 60 | <a href="#">NX_Q95256</a>     | ENSG00000115607                 | Interleukin-18 receptor acce   | IL18RAP                | 2q12.1     |       |          | yes        | yes          |                |                |         | yes     | yes          |             | Enhanced                             | Tissue enhanced            | Detected in many       | blood,bone marrow,lymphoid tissue                                 |
| 61 | <a href="#">NX_Q9UBK5</a>     | ENSG00000126264                 | Hematopoietic cell signal tra  | HBST                   | 19q13.12   |       |          |            | yes          |                |                |         | yes     | yes          |             | Enhanced                             | Tissue enhanced            | Detected in many       | blood,bone marrow,lymphoid tissue                                 |
| 62 | <a href="#">NX_Q6F173</a>     | ENSG00000203812,ENSG00000141977 | Histone H2A type 2-A           | HIST2H2AA3, HIST2H2AA4 | 1q21.2     |       |          | yes        | yes          |                |                |         | yes     | yes          |             | Supported                            | Group enriched,Tissue enha | Detected in many       | blood,bone marrow,lymphoid tissue                                 |
| 63 | <a href="#">NX_Q96Q77</a>     | ENSG00000141977                 | Calcium and integrin-binding   | CIB3                   | 19p13.11   |       |          |            | yes          |                |                |         |         | yes          |             | Uncertain                            | Group enriched             | Detected in some       | blood,bone marrow,testis                                          |
| 64 | <a href="#">NX_Q95399</a>     | ENSG00000049247                 | Urotensin-2                    | UTS2                   | 1p36.23    |       |          | yes        |              |                |                |         |         | yes          |             | Uncertain                            | Tissue enhanced            | Detected in some       | blood,brain                                                       |
| 65 | <a href="#">NX_P41146</a>     | ENSG00000125510                 | Nociceptin receptor            | OPRL1                  | 20q13.33   |       |          |            | yes          |                |                |         |         | yes          |             | N/A                                  | Tissue enhanced            | Detected in many       | blood,brain                                                       |
| 66 | <a href="#">NX_P26717</a>     | ENSG00000205809                 | NKG2-C type II integral mer    | KLRC2                  | 12p13.2    |       |          | yes        | yes          |                |                |         |         | yes          |             | N/A                                  | Tissue enhanced            | Detected in many       | blood,brain                                                       |
| 67 | <a href="#">NX_P0DMS8</a>     | ENSG00000282608                 | Adenosine receptor A3          | ADORA3                 | 1p13.2     |       |          | yes        |              |                |                |         |         | yes          |             | N/A                                  | Group enriched             | Detected in many       | blood,brain                                                       |
| 68 | <a href="#">NX_P48145</a>     | ENSG00000183729                 | Neuropeptides B/W recepto      | NPBWR1                 | 8q11.23    |       |          |            |              |                |                |         |         |              |             |                                      |                            |                        |                                                                   |

ST3\_Human Protein Atlas IHC and mRNA Data Added to neXtProt Data (ST2) for 950 Non-MS-Based neXtProt PE1 Proteins  
(ordered alphabetically by tissue with highest expression, Column S)

| 1   | A                          | B                 | C                                | D             | E          | F     | G        | H          | I            | J              | K              | L       | M       | N            | O           | P                                    | Q                          | R                             | S                                     |
|-----|----------------------------|-------------------|----------------------------------|---------------|------------|-------|----------|------------|--------------|----------------|----------------|---------|---------|--------------|-------------|--------------------------------------|----------------------------|-------------------------------|---------------------------------------|
|     | accession code             | Ensembl gene code | protein name                     | gene name(s)  | chromosome | Edman | textbook | Disease mu | 3D structure | SP curated PPI | IntAct PPI GOL | Exp PTM | Ab info | Exp function | mutagenesis | Tissue Atlas reliability score HPA19 | Consensus RNA Specificity  | Consensus Distribution        | Tissue(s) Most Enriched/Enhanced      |
| 87  | <a href="#">NX_Q16559</a>  | ENSG00000186051   | T-cell acute lymphocytic leu     | TAL2          | 9q31.2     |       |          |            |              |                | yes            |         |         |              |             | Uncertain                            | Group enriched             | Detected in some              | blood,kidney,skeletal muscle          |
| 88  | <a href="#">NX_Q81ZU0</a>  | ENSG00000177138   | Protein FAM9B                    | FAM9B         | Xp22.31    |       |          |            |              |                | yes            |         |         |              |             | Uncertain                            | Tissue enhanced            | Detected in some              | blood,liver,testis                    |
| 89  | <a href="#">NX_P13236</a>  | ENSG00000275302   | C-C motif chemokine 4            | CCL4          | 17q12      |       |          | yes        | yes          | yes            | yes            | yes     | yes     | yes          | yes         | Approved                             | Group enriched             | Detected in many              | blood,lung,lymphoid tissue            |
| 90  | <a href="#">NX_P47992</a>  | ENSG00000143184   | Lymphotoxin                      | XCL1          | 1q24.2     |       |          | yes        | yes          | yes            | yes            |         |         |              |             | Approved                             | Group enriched             | Detected in many              | blood,lymphoid tissue                 |
| 91  | <a href="#">NX_Q5VWK5</a>  | ENSG00000162594   | Interleukin-23 receptor          | IL23R         | 1p31.3     |       |          |            | yes          | yes            | yes            | yes     | yes     | yes          | yes         | Uncertain                            | Tissue enhanced            | Detected in some              | blood,lymphoid tissue                 |
| 92  | <a href="#">NX_Q13007</a>  | ENSG00000162892   | Interleukin-24                   | IL24          | 1q32.1     |       |          |            | yes          | yes            | yes            | yes     | yes     | yes          | yes         | Uncertain                            | Tissue enhanced            | Detected in many              | blood,lymphoid tissue                 |
| 93  | <a href="#">NX_Q6ISU1</a>  | ENSG00000171611   | Pre T-cell antigen receptor      | PTCRA         | 6p21.1     |       |          |            | yes          | yes            | yes            | yes     |         |              |             | N/A                                  | Group enriched             | Detected in some              | blood,lymphoid tissue                 |
| 94  | <a href="#">NX_Q8WXG8</a>  | ENSG00000171643   | Protein S100-Z                   | S100Z         | 5q13.3     | yes   |          |            | yes          | yes            | yes            |         |         |              |             | Approved                             | Tissue enhanced            | Detected in many              | blood,lymphoid tissue                 |
| 95  | <a href="#">NX_P10966</a>  | ENSG00000172116   | T-cell surface glycoprotein      | CD8B          | 2p11.2     |       |          |            | yes          | yes            |                | yes     | yes     | yes          | yes         | Enhanced                             | Group enriched             | Detected in many              | blood,lymphoid tissue                 |
| 96  | <a href="#">NX_Q93077</a>  | ENSG00000180573   | Histone H2A type 1-C             | HIST1H2AC     | 6p22.2     |       |          |            | yes          | yes            |                | yes     | yes     | yes          | yes         | Supported                            | Group enriched             | Detected in all               | blood,lymphoid tissue                 |
| 97  | <a href="#">NX_P62807</a>  | ENSG00000180596   | Histone H2B type 1-C/E/F/G       | H2BC10, H2BC4 | 6p22.2     | yes   |          |            | yes          | yes            | yes            | yes     | yes     | yes          | yes         | Supported                            | Group enriched,Tissue enha | Detected in all,Detected in r | blood,lymphoid tissue                 |
| 98  | <a href="#">NX_Q9H2W2</a>  | ENSG00000185155   | Homeobox protein MIXL1           | MIXL1         | 1q42.12    |       |          |            |              |                |                | yes     | yes     | yes          | yes         | N/A                                  | Tissue enhanced            | Detected in some              | blood,lymphoid tissue                 |
| 99  | <a href="#">NX_P46098</a>  | ENSG00000166736   | 5-hydroxytryptamine recept       | HTR3A         | 11q23.2    |       |          |            |              | yes            | yes            |         |         | yes          | yes         | Supported                            | Tissue enhanced            | Detected in some              | blood,lymphoid tissue,salivary gland  |
| 100 | <a href="#">NX_Q00155</a>  | ENSG00000170128   | Probable G-protein coupled       | GPR25         | 1q32.1     |       |          |            |              |                | yes            |         |         | yes          | yes         | N/A                                  | Tissue enhanced            | Detected in some              | blood,lymphoid tissue,stomach 1       |
| 101 | <a href="#">NX_Q57IA1</a>  | ENSG00000167077   | Meiosis inhibitor protein 1      | MEI1          | 22q13.2    |       |          | yes        |              |                |                |         |         |              |             | Approved                             | Tissue enhanced            | Detected in many              | blood,lymphoid tissue,testis          |
| 102 | <a href="#">NX_P51685</a>  | ENSG00000179934   | C-C chemokine receptor typ       | CCR8          | 3p22.1     |       |          |            |              |                |                |         |         | yes          | yes         | Enhanced                             | Group enriched             | Detected in some              | blood,lymphoid tissue,urinary bladder |
| 103 | <a href="#">NX_Q99665</a>  | ENSG00000081985   | Interleukin-12 receptor sub      | IL12RB2       | 1p31.3     |       |          |            | yes          | yes            |                | yes     | yes     | yes          | yes         | Uncertain                            | Tissue enhanced            | Detected in many              | blood,pancreas                        |
| 104 | <a href="#">NX_Q86XJ0</a>  | ENSG00000183128   | Calcium homeostasis modu         | CALHM3        | 10q24.33   |       |          |            |              |                | yes            |         |         |              |             | Uncertain                            | Tissue enhanced            | Detected in some              | blood,pancreas,testis                 |
| 105 | <a href="#">NX_Q6QHK4</a>  | ENSG00000183733   | Factor in the germline alpha     | FIGLA         | 2p13.3     |       |          |            |              | yes            |                |         |         | yes          | yes         | Supported                            | Tissue enhanced            | Detected in some              | blood,pancreas,testis                 |
| 106 | <a href="#">NX_Q9BQS6</a>  | ENSG00000260325   | Heat shock protein beta-9        | HSPB9         | 17q21.2    |       |          |            |              |                | yes            |         |         |              |             | N/A                                  | Tissue enhanced            | Detected in some              | blood,pancreas,testis                 |
| 107 | <a href="#">NX_Q6XD76</a>  | ENSG00000187855   | Achaete-scute homolog 4          | ASCL4         | 12q23.3    |       |          |            |              |                |                |         |         | yes          | yes         | Uncertain                            | Tissue enhanced            | Detected in some              | blood,parathyroid gland               |
| 108 | <a href="#">NX_Q8WFX3</a>  | ENSG00000171136   | Relaxin-3                        | RLN3          | 19p13.12   | yes   |          |            | yes          | yes            | yes            | yes     | yes     | yes          | yes         | N/A                                  | Tissue enhanced            | Detected in some              | blood,parathyroid gland,testis        |
| 109 | <a href="#">NX_Q17RF5</a>  | ENSG00000174792   | Odontogenesis associated         | ODAPH         | 4q21.1     |       |          |            |              |                | yes            |         |         | yes          | yes         | N/A                                  | Group enriched             | Detected in some              | blood,placenta                        |
| 110 | <a href="#">NX_Q9BXT2</a>  | ENSG00000130433   | Voltage-dependent calcium        | CACNG6        | 19q13.42   |       |          |            |              | yes            |                |         |         | yes          | yes         | N/A                                  | Group enriched             | Detected in some              | blood,skeletal muscle                 |
| 111 | <a href="#">NX_P03901</a>  | ENSG00000212907   | NADH-ubiquinone oxidoredu        | MT-ND4L       | MT         |       | yes      | yes        |              |                |                |         |         |              |             | N/A                                  | Tissue enhanced            | Detected in all               | blood,skeletal muscle                 |
| 112 | <a href="#">NX_B2CW77</a>  | ENSG00000227268   | Killin                           | KLLN          | 10q23.31   |       |          |            |              |                |                |         |         | yes          | yes         | N/A                                  | Tissue enhanced            | Detected in many              | blood,skeletal muscle                 |
| 113 | <a href="#">NX_Q9NZD1</a>  | ENSG00000111291   | G-protein coupled receptor       | GPRC5D        | 12p13.1    |       |          |            |              |                | yes            |         |         |              |             | Approved                             | Tissue enhanced            | Detected in many              | blood,skin 1                          |
| 114 | <a href="#">NX_Q8N8W4</a>  | ENSG00000180316   | Patatin-like phospholipase d     | PNPLA1        | 6p21.31    |       | yes      |            |              |                |                | yes     |         |              |             | N/A                                  | Tissue enhanced            | Detected in some              | blood,skin 1                          |
| 115 | <a href="#">NX_P60328</a>  | ENSG00000205439   | Keratin-associated protein 1     | KRTAP12-3     | 21q22.3    |       |          |            |              | yes            | yes            |         |         | yes          | yes         | N/A                                  | Group enriched             | Detected in some              | blood,skin 1                          |
| 116 | <a href="#">NX_D3W0D1</a>  | ENSG00000256797   | Killer cell lectin-like receptor | KLRF2         | 12p13.31   |       |          |            | yes          | yes            |                | yes     | yes     | yes          | yes         | N/A                                  | Tissue enhanced            | Detected in some              | blood,skin 1                          |
| 117 | <a href="#">NX_Q8NFR3</a>  | ENSG00000196542   | Serine palmitoyltransferase      | SPTSSB        | 3q26.1     |       |          |            |              | yes            |                |         |         | yes          | yes         | N/A                                  | Tissue enhanced            | Detected in many              | blood,skin 1,stomach 1                |
| 118 | <a href="#">NX_Q723Y9</a>  | ENSG00000186393   | Keratin, type I cytoskeletal 2   | KRT26         | 17q21.2    |       |          |            |              |                |                |         | yes     |              |             | Enhanced                             | Group enriched             | Detected in some              | blood,skin 1,testis                   |
| 119 | <a href="#">NX_P0CL81</a>  | ENSG00000215269   | G antigen 12G                    | GAGE12G       | Xp11.23    |       |          |            |              | yes            |                |         |         |              |             | Supported                            | Group enriched             | Detected in some              | blood,stomach 1                       |
| 120 | <a href="#">NX_Q9H9S0</a>  | ENSG00000117704   | Homeobox protein NANOG           | NANOG         | 12p13.31   |       |          |            | yes          | yes            | yes            |         | yes     | yes          | yes         | Supported                            | Tissue enhanced            | Detected in some              | blood,testis                          |
| 121 | <a href="#">NX_P05113</a>  | ENSG00000113525   | Interleukin-5                    | IL5           | 5q31.1     | yes   |          |            | yes          | yes            | yes            | yes     | yes     | yes          | yes         | Approved                             | Tissue enhanced            | Detected in some              | blood,testis                          |
| 122 | <a href="#">NX_Q97980</a>  | ENSG00000158497   | Minor histocompatibility prot    | MHMB1         | 5q31.3     | yes   |          |            | yes          | yes            | yes            | yes     | yes     | yes          | yes         | N/A                                  | Tissue enhanced            | Detected in some              | blood,testis                          |
| 123 | <a href="#">NX_P0CJ25</a>  | ENSG00000168930   | Tripartite motif-containing p    | TRIM49        | 11q14.3    |       |          |            |              |                | yes            |         |         |              |             | N/A                                  | Tissue enhanced            | Detected in some              | blood,testis                          |
| 124 | <a href="#">NX_A6NMN3</a>  | ENSG00000172538   | Protein FAM170B                  | FAM170B       | 10q11.23   |       |          |            |              | yes            |                |         |         |              |             | Uncertain                            | Group enriched             | Detected in some              | blood,testis                          |
| 125 | <a href="#">NX_P0CL80</a>  | ENSG00000236362   | G antigen 12F                    | GAGE12F       | Xp11.23    |       |          |            |              |                | yes            |         |         |              |             | Supported                            | Group enriched             | Detected in some              | blood,testis                          |
| 126 | <a href="#">NX_P33763</a>  | ENSG00000196420   | Protein S100-A5                  | S100A5        | 1q21.3     |       |          |            | yes          | yes            |                |         |         | yes          | yes         | N/A                                  | Tissue enhanced            | Detected in many              | blood,thyroid gland                   |
| 127 | <a href="#">NX_Q5TGU0</a>  | ENSG00000112212   | Translocator protein 2           | TSPO2         | 6p21.1     |       |          |            |              |                | yes            |         |         | yes          | yes         | N/A                                  | Tissue enriched            | Detected in some              | bone marrow                           |
| 128 | <a href="#">NX_Q6LJX52</a> | ENSG00000187997   | Protein IL-40                    | C17orf99      | 17q25.3    | yes   |          |            |              |                |                |         |         |              |             | Uncertain                            | Tissue enriched            | Detected in some              | bone marrow                           |
| 129 | <a href="#">NX_Q8N2N9</a>  | ENSG00000196912   | Ankyrin repeat domain-conta      | ANKRD36B      | 2q11.2     |       |          |            |              |                | yes            |         |         |              |             | N/A                                  | Tissue enhanced            | Detected in many              | bone marrow                           |
| 130 | <a href="#">NX_Q574T1</a>  | ENSG00000205269   | Transmembrane protein 170        | TMEM170B      | 6p24.2     |       |          |            | yes          | yes            |                | yes     | yes     | yes          | yes         | Uncertain                            | Tissue enhanced            | Detected in all               | bone marrow                           |
| 131 | <a href="#">NX_Q8NFJ6</a>  | ENSG00000101292   | Prokineticin receptor 2          | PROKR2        | 20p12.3    |       |          | yes        | yes          | yes            |                |         |         | yes          | yes         | Uncertain                            | Tissue enhanced            | Detected in some              | bone marrow,brain                     |
| 132 | <a href="#">NX_Q8TAF8</a>  | ENSG00000197753   | LHFPL tetraspan subfamily        | LHFPL5        | 6p21.31    |       |          | yes        |              |                | yes            |         |         |              |             | Uncertain                            | Group enriched             | Detected in some              | bone marrow,brain,epididymis,pancreas |
| 133 | <a href="#">NX_O14842</a>  | ENSG00000126266   | Free fatty acid receptor 1       | FFAR1         | 19q13.12   |       |          |            | yes          |                |                |         | yes     | yes          | yes         | N/A                                  | Tissue enhanced            | Detected in some              | bone marrow,brain,ovary,pancreas      |
| 134 | <a href="#">NX_P08700</a>  | ENSG00000164399   | Interleukin-3                    | IL3           | 5q31.1     |       |          |            |              | yes            |                |         | yes     | yes          | yes         | N/A                                  | Tissue enhanced            | Detected in some              | bone marrow,lymphoid tissue           |
| 135 | <a href="#">NX_Q494W8</a>  | ENSG00000166664   | CHRNA7-FAM7A fusion pro          | CHRFAM7A      | 15q13.2    |       |          |            |              |                | yes            |         |         |              |             | N/A                                  | Tissue enhanced            | Detected in many              | bone marrow,parathyroid gland         |
| 136 | <a href="#">NX_Q57764</a>  | ENSG00000204010   | Interferon-induced protein w     | IFIT1B        | 10q23.31   |       |          |            |              |                | yes            |         |         |              |             | Approved                             | Group enriched             | Detected in some              | bone marrow,placenta                  |
| 137 | <a href="#">NX_Q94810</a>  | ENSG00000076344   | Regulator of G-protein signa     | RGS11         | 16p13.3    |       |          |            |              |                |                |         | yes     | yes          | yes         | Uncertain                            | Tissue enhanced            | Detected in many              | brain                                 |
| 138 | <a href="#">NX_Q9NP95</a>  | ENSG00000078579   | Fibroblast growth factor 20      | FGF20         | 8p22       |       |          | yes        | yes          |                |                |         |         | yes          | yes         | N/A                                  | Tissue enhanced            | Detected in some              | brain                                 |
| 139 | <a href="#">NX_Q15319</a>  | ENSG00000091010   | POU domain, class 4, trans       | POU4F3        | 5q32       |       | yes      |            |              |                |                |         |         | yes          | yes         | Uncertain                            | Tissue enhanced            | Detected in some              | brain                                 |
| 140 | <a href="#">NX_Q92737</a>  | ENSG00000100276   | Ras-like protein family mem      | RASL10A       | 22q12.2    |       |          |            |              |                | yes            |         |         | yes          | yes         | Approved                             | Tissue enriched            | Detected in many              | brain                                 |
| 141 | <a href="#">NX_Q9Y5N1</a>  | ENSG00000101180   | Histamine H3 receptor            | HRH3          | 20q13.33   |       |          |            |              |                |                |         | yes     | yes          | yes         | N/A                                  | Tissue enriched            | Detected in some              | brain                                 |
| 142 | <a href="#">NX_Q43364</a>  | ENSG00000105996   | Homeobox protein Hox-A2          | HOXA2         | 7p15.2     |       | yes      |            |              |                |                |         | yes     | yes          | yes         | N/A                                  | Tissue enhanced            | Detected in many              | brain                                 |
| 143 | <a href="#">NX_Q13324</a>  | ENSG00000106113   | Corticotropin-releasing fact     | CRHR2         | 7p14.3     |       |          | yes        | yes          | yes            | yes            | yes     | yes     | yes          | yes         | N/A                                  | Tissue enhanced            | Detected in many              | brain                                 |
| 144 | <a href="#">NX_Q9UPM6</a>  | ENSG00000106852   | LIM/homeobox protein Lhx6        | LHX6          | 9q33.2     |       |          |            |              |                | yes            |         |         |              |             | Approved                             | Tissue enhanced            | Detected in many              | brain                                 |
| 145 | <a href="#">NX_Q75443</a>  | ENSG00000109927   | Alpha-tectorin                   | TECTA         | 11q23.3    |       | yes      |            | yes          | yes            |                | yes     |         |              |             | Approved                             | Tissue enhanced            | Detected in many              | brain                                 |
| 146 | <a href="#">NX_Q9NP25</a>  | ENSG00000112309   | Galactosylgalactosylxylosyl      | B3GAT2        | 6q13       |       |          | yes        |              |                |                |         |         |              |             | Uncertain                            | Tissue enriched            | Detected in many              | brain                                 |
| 147 | <a href="#">NX_Q9Y466</a>  | ENSG00000112333   | Nuclear receptor subfamily       | NR2E1         | 6q21       |       |          | yes        |              |                | yes            |         |         |              |             | Uncertain                            | Tissue enriched            | Detected in some              | brain                                 |
| 148 | <a href="#">NX_P41143</a>  | ENSG00000116329   | Delta-type opioid receptor       | OPRD1         | 1p35.3     |       |          | yes        | yes          | yes            | yes            | yes     | yes     | yes          | yes         | Approved                             | Tissue enhanced            | Detected in some              | brain                                 |
| 149 | <a href="#">NX_P01286</a>  | ENSG00000118702   | Somatoliberin                    | GHRH          | 20q11.23   | yes   |          |            | yes          | yes            | yes            | yes     | yes     | yes          | yes         | N/A                                  | Tissue enriched            | Detected in some              | brain                                 |
| 150 | <a href="#">NX_Q95800</a>  | ENSG00000119737   | Probable G-protein coupled       | GPR75         | 2p16.2     |       | yes      |            |              |                |                |         | yes     |              |             | N/A                                  | Tissue enhanced            | Detected in many              | brain                                 |
| 151 | <a href="#">NX_Q9NYW2</a>  | ENSG00000121314   | Taste receptor type 2 mem        | TAS2R8        | 12p13.2    |       |          |            |              |                |                | yes     |         |              |             | N/A                                  | Tissue enhanced            | Detected in single            | brain                                 |
| 152 | <a href="#">NX_Q43613</a>  | ENSG00000121764   | Orexin receptor type 1           | HCRTR1        | 1p35.2     |       |          | yes        |              |                | yes            |         | yes     | yes          | yes         | Approved                             | Tissue enhanced            | Detected in some              | brain                                 |
| 153 | <a href="#">NX_P41968</a>  | ENSG00000124089   |                                  |               |            |       |          |            |              |                |                |         |         |              |             |                                      |                            |                               |                                       |

ST3\_Human Protein Atlas IHC and mRNA Data Added to neXtProt Data (ST2) for 950 Non-MS-Based neXtProt PE1 Proteins  
(ordered alphabetically by tissue with highest expression, Column S)

| 1   | A                          | B                 | C                             | D            | E          | F     | G        | H          | I            | J              | K              | L       | M       | N            | O           | P                                    | Q                         | R                      | S                                                         |
|-----|----------------------------|-------------------|-------------------------------|--------------|------------|-------|----------|------------|--------------|----------------|----------------|---------|---------|--------------|-------------|--------------------------------------|---------------------------|------------------------|-----------------------------------------------------------|
|     | accession code             | Ensembl gene code | protein name                  | gene name(s) | chromosome | Edman | textbook | Disease mu | 3D structure | SP curated PPI | IntAct PPI GOL | Exp PTM | Ab info | Exp function | mutagenesis | Tissue Atlas reliability score HPA19 | Consensus RNA Specificity | Consensus Distribution | Tissue(s) Most Enriched/Enhanced                          |
| 172 | <a href="#">NX_Q8IZ57</a>  | ENSG00000152954   | Neurensin-1                   | NRSN1        | 6p22.3     |       |          |            |              |                | yes            |         |         | yes          |             | Uncertain                            | Tissue enriched           | Detected in many       | brain                                                     |
| 173 | <a href="#">NX_Q8NDV2</a>  | ENSG00000154478   | G-protein coupled receptor    | GPR26        | 10q26.13   |       |          |            |              |                |                |         |         | yes          | yes         | Enhanced                             | Tissue enriched           | Detected in single     | brain                                                     |
| 174 | <a href="#">NX_Q14604</a>  | ENSG00000154620   | Thymosin beta-4, Y-chrom      | TMSB4Y       | Yq11.221   |       |          |            |              |                | yes            |         |         |              |             | N/A                                  | Tissue enhanced           | Detected in many       | brain                                                     |
| 175 | <a href="#">NX_Q9JULS6</a> | ENSG00000156486   | Potassium voltage-gated ch    | KCNK2        | 8q22.2     |       |          |            |              |                | yes            |         |         |              |             | Uncertain                            | Tissue enriched           | Detected in many       | brain                                                     |
| 176 | <a href="#">NX_P50406</a>  | ENSG00000158748   | 5-hydroxytryptamine recept    | HTR6         | 1p36.13    |       |          |            |              | yes            | yes            |         |         |              |             | Uncertain                            | Tissue enriched           | Detected in some       | brain                                                     |
| 177 | <a href="#">NX_Q61CH4</a>  | ENSG00000160781   | Membrane progesterin recept   | PAQR6        | 1q22       |       | yes      |            |              | yes            |                |         |         |              |             | N/A                                  | Tissue enriched           | Detected in many       | brain                                                     |
| 178 | <a href="#">NX_Q43612</a>  | ENSG00000161610   | Orexin                        | HCRT         | 17q21.2    |       |          | yes        | yes          |                |                |         |         |              |             | Enhanced                             | Tissue enriched           | Detected in some       | brain                                                     |
| 179 | <a href="#">NX_Q9H3M0</a>  | ENSG00000162975   | Potassium voltage-gated ch    | KCNF1        | 2p25.1     |       |          |            |              | yes            |                |         |         |              |             | Enhanced                             | Tissue enriched           | Detected in many       | brain                                                     |
| 180 | <a href="#">NX_Q6PIU1</a>  | ENSG00000164794   | Potassium voltage-gated ch    | KCNV1        | 8q23.2     |       |          |            |              | yes            |                |         |         |              |             | N/A                                  | Tissue enriched           | Detected in some       | brain                                                     |
| 181 | <a href="#">NX_Q96NL1</a>  | ENSG00000164841   | Transmembrane protein 74      | TMEM74       | 8q23.1     |       |          |            |              | yes            |                |         |         |              |             | Uncertain                            | Tissue enhanced           | Detected in many       | brain                                                     |
| 182 | <a href="#">NX_Q96P66</a>  | ENSG00000165370   | Probable G-protein coupled    | GPR101       | Xq26.3     |       |          | yes        |              |                |                |         |         |              |             | Uncertain                            | Tissue enriched           | Detected in single     | brain                                                     |
| 183 | <a href="#">NX_Q95665</a>  | ENSG00000169006   | Neurotensin receptor type 2   | NTSR2        | 2p25.1     |       |          |            |              |                |                | yes     | yes     |              |             | N/A                                  | Tissue enriched           | Detected in many       | brain                                                     |
| 184 | <a href="#">NX_Q8TAE7</a>  | ENSG00000171126   | Potassium voltage-gated ch    | KCNK3        | 2p21       |       |          |            |              | yes            |                |         |         |              |             | N/A                                  | Tissue enhanced           | Detected in many       | brain                                                     |
| 185 | <a href="#">NX_Q5XKR4</a>  | ENSG00000171540   | Homeobox protein orthoped     | OTP          | 5q14.1     |       |          |            |              |                |                |         | yes     | yes          |             | Enhanced                             | Tissue enriched           | Detected in some       | brain                                                     |
| 186 | <a href="#">NX_Q86YD7</a>  | ENSG00000171847   | Protein FAM90A1               | FAM90A1      | 12p13.31   |       |          |            |              |                | yes            |         |         |              |             | N/A                                  | Tissue enhanced           | Detected in many       | brain                                                     |
| 187 | <a href="#">NX_P25100</a>  | ENSG00000171873   | Alpha-1D adrenergic recept    | ADRA1D       | 20p13      |       |          |            |              | yes            | yes            |         |         |              |             | Uncertain                            | Tissue enhanced           | Detected in many       | brain                                                     |
| 188 | <a href="#">NX_Q6PI25</a>  | ENSG00000174871   | Protein cornichon homolog     | CNIH2        | 11q13.2    |       |          |            |              | yes            |                |         |         |              |             | N/A                                  | Tissue enriched           | Detected in many       | brain                                                     |
| 189 | <a href="#">NX_Q8N966</a>  | ENSG00000177108   | Palmitoyltransferase ZDHH     | ZDHH2        | 14q24.3    |       |          |            |              | yes            |                |         |         |              |             | N/A                                  | Tissue enriched           | Detected in many       | brain                                                     |
| 190 | <a href="#">NX_Q9J9J6</a>  | ENSG00000178342   | Potassium voltage-gated ch    | KCNK2        | 18q23      |       |          |            |              | yes            |                |         |         |              |             | Enhanced                             | Tissue enriched           | Detected in some       | brain                                                     |
| 191 | <a href="#">NX_P58400</a>  | ENSG00000179915   | Neurexin-1-beta               | NRXN1        | 2p16.3     |       |          | yes        |              |                |                |         |         |              |             | N/A                                  | Tissue enriched           | Detected in many       | brain                                                     |
| 192 | <a href="#">NX_P46089</a>  | ENSG00000181773   | G-protein coupled receptor    | GPR3         | 1p36.11    |       |          |            |              |                |                |         |         | yes          |             | Uncertain                            | Tissue enhanced           | Detected in many       | brain                                                     |
| 193 | <a href="#">NX_P51861</a>  | ENSG00000184258   | Cerebellar degeneration-rel   | CDR1         | Xq27.1     |       |          |            |              |                | yes            |         |         |              |             | N/A                                  | Tissue enriched           | Detected in some       | brain                                                     |
| 194 | <a href="#">NX_Q9HB15</a>  | ENSG00000184261   | Potassium channel subfamil    | KCNK12       | 2p16.3     |       |          |            |              |                |                |         |         |              | yes         | N/A                                  | Tissue enriched           | Detected in many       | brain                                                     |
| 195 | <a href="#">NX_Q5H9J7</a>  | ENSG00000184515   | Protein BEX5                  | BEX5         | Xq22.1     |       |          |            |              |                | yes            |         |         |              |             | Enhanced                             | Tissue enhanced           | Detected in many       | brain                                                     |
| 196 | <a href="#">NX_P08912</a>  | ENSG00000184984   | Muscarinic acetylcholine red  | CHRM5        | 15q14      |       |          |            |              |                |                |         |         | yes          |             | Uncertain                            | Tissue enriched           | Detected in some       | brain                                                     |
| 197 | <a href="#">NX_Q96AQ9</a>  | ENSG00000185519   | Protein FAM131C               | FAM131C      | 1p36.13    |       |          |            |              |                |                |         |         |              |             | Uncertain                            | Tissue enhanced           | Detected in many       | brain                                                     |
| 198 | <a href="#">NX_Q14D33</a>  | ENSG00000188011   | Receptor-transporting prote   | RTP5         | 2q37.3     |       |          |            |              |                | yes            |         |         |              |             | Enhanced                             | Tissue enriched           | Detected in some       | brain                                                     |
| 199 | <a href="#">NX_Q6JUWM7</a> | ENSG00000188501   | Lactase-like protein          | LCTL         | 15q22.31   |       | yes      |            |              |                |                |         |         |              |             | N/A                                  | Tissue enhanced           | Detected in some       | brain                                                     |
| 200 | <a href="#">NX_P49335</a>  | ENSG00000196767   | POU domain, class 3, trans    | POU3F4       | Xq21.1     |       |          | yes        |              | yes            |                |         |         |              |             | N/A                                  | Tissue enriched           | Detected in some       | brain                                                     |
| 201 | <a href="#">NX_P52744</a>  | ENSG00000197008   | Zinc finger protein 138       | ZNF138       | 7q11.21    |       |          |            |              |                |                |         |         | yes          |             | N/A                                  | Tissue enhanced           | Detected in all        | brain                                                     |
| 202 | <a href="#">NX_A4GXA9</a>  | ENSG00000197774   | Probable crossover junction   | EME2         | 16p13.3    |       |          |            |              | yes            |                |         |         |              |             | Uncertain                            | Tissue enhanced           | Detected in many       | brain                                                     |
| 203 | <a href="#">NX_Q5TAB7</a>  | ENSG00000203877   | Protein ripply2               | RIPPLY2      | 6q14.2     |       |          |            |              |                | yes            |         |         |              |             | Uncertain                            | Tissue enhanced           | Detected in many       | brain                                                     |
| 204 | <a href="#">NX_Q5SRR4</a>  | ENSG00000204428   | Lymphocyte antigen 6 comp     | LY6G5C       | 6p21.33    |       |          |            | yes          |                |                | yes     |         |              |             | Approved                             | Tissue enhanced           | Detected in some       | brain                                                     |
| 205 | <a href="#">NX_Q9Y5H9</a>  | ENSG00000204969   | Protocadherin alpha-2         | PCDHA2       | 5q31.3     | yes   |          |            |              |                |                |         |         |              |             | Uncertain                            | Tissue enhanced           | Detected in many       | brain                                                     |
| 206 | <a href="#">NX_Q7RTU4</a>  | ENSG00000205899   | Class A basic helix-loop-hel  | BHLHA9       | 17p13.3    |       |          | yes        |              | yes            |                |         |         |              |             | N/A                                  | Tissue enriched           | Detected in single     | brain                                                     |
| 207 | <a href="#">NX_Q9H0X6</a>  | ENSG00000212864   | RING finger protein 208       | RNF208       | 9q34.3     |       |          |            |              |                | yes            |         |         |              |             | Uncertain                            | Tissue enhanced           | Detected in many       | brain                                                     |
| 208 | <a href="#">NX_Q9UHC3</a>  | ENSG00000213199   | Acid-sensing ion channel 3    | ASIC3        | 7q36.1     |       |          |            |              | yes            |                |         |         |              |             | Enhanced                             | Tissue enhanced           | Detected in many       | brain                                                     |
| 209 | <a href="#">NX_P0C7T4</a>  | ENSG00000221887   | Minor histocompatibility prot | HMSD         | 18q22.1    |       |          |            |              | yes            |                |         |         |              |             | N/A                                  | Tissue enriched           | Detected in many       | brain                                                     |
| 210 | <a href="#">NX_Q95411</a>  | ENSG00000221995   | TGFB1-induced anti-apopto     | TIAF1        | 17q11.2    |       |          |            |              |                | yes            |         |         |              |             | N/A                                  | Tissue enhanced           | Detected in many       | brain                                                     |
| 211 | <a href="#">NX_Q00230</a>  | ENSG00000241563   | Cortistatin                   | CORT         | 1p36.22    |       |          |            |              |                | yes            |         |         |              |             | N/A                                  | Tissue enriched           | Detected in many       | brain                                                     |
| 212 | <a href="#">NX_P26441</a>  | ENSG00000242689   | Ciliary neurotrophic factor   | CNTF         | 11q12.1    |       |          | yes        |              | yes            |                |         |         |              |             | Approved                             | Tissue enriched           | Detected in many       | brain                                                     |
| 213 | <a href="#">NX_B3KU38</a>  | ENSG00000283154   | IQCJ-SCHIP1 readthrough       | IQCJ-SCHIP1  | 3q25.32    |       |          |            |              | yes            |                |         |         |              |             | Approved                             | Tissue enhanced           | Detected in many       | brain                                                     |
| 214 | <a href="#">NX_Q8NEQ6</a>  | ENSG00000183888   | Steroid receptor-associated   | SRAP         | 1p36.13    |       |          |            |              | yes            |                |         |         |              |             | Uncertain                            | Tissue enhanced           | Detected in many       | brain,breast                                              |
| 215 | <a href="#">NX_Q75311</a>  | ENSG00000145451   | Glycine receptor subunit alp  | GLRA3        | 4q34.1     |       |          | yes        |              | yes            |                | yes     |         |              |             | N/A                                  | Group enriched            | Detected in some       | brain,breast,pituitary gland                              |
| 216 | <a href="#">NX_Q8IWL8</a>  | ENSG00000256762   | Saitohin                      | STH          | 17q21.31   |       |          |            |              | yes            |                |         |         |              |             | N/A                                  | Tissue enhanced           | Detected in some       | brain,breast,placenta,skeletal muscle                     |
| 217 | <a href="#">NX_P04201</a>  | ENSG00000130368   | Proto-oncogene Mas            | MAS1         | 6q25.3     |       |          |            |              | yes            |                |         | yes     | yes          |             | N/A                                  | Tissue enhanced           | Detected in some       | brain,cervix,uterine                                      |
| 218 | <a href="#">NX_Q92915</a>  | ENSG00000102466   | Fibroblast growth factor 14   | FGF14        | 13q33.1    |       | yes      |            |              | yes            |                |         |         |              |             | N/A                                  | Group enriched            | Detected in many       | brain,cervix,uterine,fallopian tube                       |
| 219 | <a href="#">NX_Q8WXD0</a>  | ENSG00000133103   | Relaxin receptor 2            | RXF2         | 13q13.1    |       | yes      | yes        |              |                |                |         |         |              |             | N/A                                  | Tissue enhanced           | Detected in some       | brain,epididymis                                          |
| 220 | <a href="#">NX_P46597</a>  | ENSG00000196435   | Acetylserotonin O-methyltr    | ASMT         | Xp22.33    |       |          | yes        | yes          |                |                | yes     | yes     |              |             | N/A                                  | Tissue enhanced           | Detected in many       | brain,epididymis                                          |
| 221 | <a href="#">NX_Q495M9</a>  | ENSG00000182040   | Usher syndrome type-1G pr     | USH1G        | 17q25.1    |       | yes      | yes        | yes          | yes            |                |         |         |              |             | Uncertain                            | Tissue enhanced           | Detected in many       | brain,epididymis,esophagus                                |
| 222 | <a href="#">NX_Q8NBB4</a>  | ENSG00000152467   | Zinc finger and SCAN doma     | ZSCAN1       | 19q13.43   |       |          |            |              |                | yes            |         |         |              |             | Uncertain                            | Tissue enhanced           | Detected in many       | brain,epididymis,pituitary gland                          |
| 223 | <a href="#">NX_A6N161</a>  | ENSG00000187616   | Protein myomaker              | MYMK         | 9q34.2     |       | yes      |            |              |                |                |         |         |              |             | Uncertain                            | Tissue enhanced           | Detected in some       | brain,epididymis,skeletal muscle                          |
| 224 | <a href="#">NX_Q9GQ35</a>  | ENSG00000155749   | Flagellum-associated coiled   | FLACC1       | 2q33.1     |       |          |            |              |                | yes            |         |         |              |             | N/A                                  | Tissue enhanced           | Detected in many       | brain,epididymis,testis                                   |
| 225 | <a href="#">NX_Q51U53</a>  | ENSG00000158816   | von Willebrand factor A dom   | VWFA5B1      | 1p36.12    |       |          |            |              |                |                |         |         |              |             | Enhanced                             | Tissue enhanced           | Detected in some       | brain,epididymis,testis                                   |
| 226 | <a href="#">NX_Q971E5</a>  | ENSG00000165509   | Melanoma-associated antig     | MAGEC3       | Xq27.2     |       |          |            |              |                |                |         |         |              |             | Approved                             | Tissue enhanced           | Detected in some       | brain,epididymis,testis                                   |
| 227 | <a href="#">NX_Q7RTU3</a>  | ENSG00000177468   | Oligodendrocyte transcriptid  | OLIG3        | 6q23.3     |       |          |            |              |                | yes            |         |         | yes          |             | Uncertain                            | Tissue enhanced           | Detected in some       | brain,esophagus,placenta                                  |
| 228 | <a href="#">NX_P32245</a>  | ENSG00000166603   | Melanocortin receptor 4       | MCLR4        | 18q21.32   |       | yes      | yes        | yes          | yes            |                | yes     |         |              |             | Uncertain                            | Tissue enhanced           | Detected in some       | brain,fallopian tube                                      |
| 229 | <a href="#">NX_Q56UN5</a>  | ENSG00000176601   | Mitogen-activated protein kil | MAP3K19      | 2q21.3     |       |          |            |              |                |                |         | yes     | yes          |             | N/A                                  | Tissue enhanced           | Detected in some       | brain,fallopian tube                                      |
| 230 | <a href="#">NX_P28336</a>  | ENSG00000135577   | Neurotrophin-3 receptor       | NMBR         | 6q24.1     |       |          |            |              |                |                |         | yes     | yes          |             | N/A                                  | Group enriched            | Detected in some       | brain,fallopian tube,testis                               |
| 231 | <a href="#">NX_Q43825</a>  | ENSG00000162630   | Beta-1,3-galactosyltransfer   | B3GALT2      | 1q31.2     |       |          |            |              |                |                |         |         |              |             | N/A                                  | Tissue enhanced           | Detected in many       | brain,gallbladder,heart muscle                            |
| 232 | <a href="#">NX_P81277</a>  | ENSG00000071677   | Prolactin-releasing peptide   | PRLH         | 2q37.3     |       |          |            |              |                |                |         |         |              |             | Approved                             | Tissue enhanced           | Detected in some       | brain,heart muscle                                        |
| 233 | <a href="#">NX_Q9NU63</a>  | ENSG00000204644   | Zinc finger protein 57 homol  | ZFP57        | 6p22.1     |       | yes      |            |              |                |                |         |         |              |             | Uncertain                            | Tissue enhanced           | Detected in many       | brain,heart muscle                                        |
| 234 | <a href="#">NX_Q13639</a>  | ENSG00000164270   | 5-hydroxytryptamine recept    | HTR4         | 5q32       |       |          | yes        | yes          | yes            |                |         |         |              |             | Enhanced                             | Group enriched            | Detected in some       | brain,heart muscle,intestine,pituitary gland              |
| 235 | <a href="#">NX_A1L167</a>  | ENSG00000215218   | Ubiquitin-conjugating enzym   | UBE2QL1      | 5p15.31    |       |          |            |              | yes            |                |         |         |              |             | N/A                                  | Group enriched            | Detected in many       | brain,heart muscle,retina,seminal vesicle,skeletal muscle |
| 236 | <a href="#">NX_P0DPB3</a>  | ENSG00000151967   | Schwannomin-interacting pr    | SCHIP1       | 3q25.33    |       |          |            |              | yes            |                |         |         |              |             | Uncertain                            | Group enriched            | Detected in many       | brain,heart muscle,skeletal muscle                        |
| 237 | <a href="#">NX_P23416</a>  | ENSG00000101958   | Glycine receptor subunit alp  | GLRA2        | Xp22.2     |       |          |            |              |                |                |         |         |              |             | Approved                             | Group enriched            | Detected in some       | brain,intestine                                           |
| 238 | <a href="#">NX_Q9Y4Z2</a>  | ENSG00000122859   | Neurogenin-3                  | NEUROG3      | 10q22.1    |       | yes      |            |              | yes            |                |         |         |              |             | Uncertain                            | Tissue enhanced           | Detected in some       | brain,intestine                                           |
| 239 | <a href="#">NX_P28221</a>  | ENSG00000179546   | 5-hydroxytryptamine recept    | HTR1D        | 1p36.12    |       |          |            | yes          |                |                |         | yes     | yes          |             | N/A                                  | Tissue enhanced           | Detected in some       | brain,intestine                                           |
| 240 | <a href="#">NX_P48039</a>  | ENSG00000168412   | Melatonin receptor type 1A    | MTNR1A       | 4          |       |          |            |              |                |                |         |         |              |             |                                      |                           |                        |                                                           |



ST3\_Human Protein Atlas IHC and mRNA Data Added to neXtProt Data (ST2) for 950 Non-MS-Based neXtProt PE1 Proteins  
(ordered alphabetically by tissue with highest expression, Column S)

| 1   | A                          | B                 | C                             | D            | E          | F     | G        | H          | I            | J              | K              | L       | M       | N            | O           | P                                    | Q                           | R                                         | S                                |
|-----|----------------------------|-------------------|-------------------------------|--------------|------------|-------|----------|------------|--------------|----------------|----------------|---------|---------|--------------|-------------|--------------------------------------|-----------------------------|-------------------------------------------|----------------------------------|
|     | accession code             | Ensembl gene code | protein name                  | gene name(s) | chromosome | Edman | textbook | Disease mu | 3D structure | SP curated PPI | IntAct PPI GOL | Exp PTM | Ab info | Exp function | mutagenesis | Tissue Atlas reliability score HPA19 | Consensus RNA Specificity   | Consensus Distribution                    | Tissue(s) Most Enriched/Enhanced |
| 342 | <a href="#">NX_P60153</a>  | ENSG00000188655   | Inactive ribonuclease-like pr | RNASE9       | 14q11.2    | yes   |          |            |              |                |                |         | yes     | yes          |             | N/A                                  | Tissue enriched             | Detected in single                        | epididymis                       |
| 343 | <a href="#">NX_Q9Y691</a>  | ENSG00000197584   | Calcium-activated potassium   | KCNMB2       | 3q26.32    |       |          | yes        | yes          |                |                | yes     | yes     | yes          |             | Uncertain                            | Tissue enhanced             | Detected in many                          | epididymis                       |
| 344 | <a href="#">NX_Q5J5C9</a>  | ENSG00000204548   | Beta-defensin 121             | DEFB121      | 20q11.21   |       |          |            |              |                |                |         |         |              |             | N/A                                  | Tissue enriched             | Detected in some                          | epididymis                       |
| 345 | <a href="#">NX_Q9NYV9</a>  | ENSG00000212128   | Taste receptor type 2 mem     | TAS2R13      | 12p13.2    |       |          |            |              |                |                |         |         | yes          |             | N/A                                  | Tissue enhanced             | Detected in single                        | epididymis                       |
| 346 | <a href="#">NX_Q75715</a>  | ENSG00000224586   | Epididymal secretory glutath  | GPX5         | 6p22.1     |       |          |            | yes          |                |                |         |         |              |             | N/A                                  | Tissue enriched             | Detected in some                          | epididymis                       |
| 347 | <a href="#">NX_P62502</a>  | ENSG00000267206   | Epididymal-specific lipocalin | LCN6         | 9q34.3     |       |          |            |              |                |                |         |         |              |             | N/A                                  | Tissue enriched             | Detected in many                          | epididymis                       |
| 348 | <a href="#">NX_P33032</a>  | ENSG00000176136   | Melanocortin receptor 5       | MC5R         | 18p11.21   |       |          |            |              |                | yes            |         | yes     | yes          | Approved    | Tissue enhanced                      | Detected in some            | epididymis,esophagus                      |                                  |
| 349 | <a href="#">NX_Q8IV77</a>  | ENSG00000132259   | Cyclic nucleotide-gated cati  | CNGA4        | 11p15.4    |       |          |            |              | yes            |                |         |         | yes          | yes         | N/A                                  | Tissue enhanced             | Detected in some                          | epididymis,fallopian tube,ovary  |
| 350 | <a href="#">NX_Q9NXI6</a>  | ENSG00000178828   | E3 ubiquitin-protein ligase R | RNF186       | 1p36.13    |       |          |            |              | yes            |                | yes     | yes     | yes          | Enhanced    | Group enriched                       | Detected in some            | epididymis,intestine,kidney,pancreas      |                                  |
| 351 | <a href="#">NX_Q9ND59</a>  | ENSG00000165188   | E3 ubiquitin-protein ligase R | RNF183       | 9q32       |       |          |            |              | yes            | yes            | yes     | yes     | yes          | Uncertain   | Tissue enhanced                      | Detected in some            | epididymis,kidney                         |                                  |
| 352 | <a href="#">NX_Q96DL1</a>  | ENSG00000204361   | NXPE family member 2          | NXPE2        | 11q23.3    |       |          |            |              |                | yes            |         |         |              | Enhanced    | Group enriched                       | Detected in some            | epididymis,salivary gland                 |                                  |
| 353 | <a href="#">NX_Q07510</a>  | ENSG00000196811   | Acetylcholine receptor subu   | CHRNA7       | 2q37.1     |       | yes      |            | yes          |                | yes            |         | yes     |              | N/A         | Group enriched                       | Detected in some            | epididymis,skeletal muscle                |                                  |
| 354 | <a href="#">NX_Q9NTQ9</a>  | ENSG00000189433   | Gap junction beta-4 protein   | GJB4         | 1p34.3     |       | yes      |            |              |                |                |         |         |              | Enhanced    | Tissue enhanced                      | Detected in many            | epididymis,skin 1                         |                                  |
| 355 | <a href="#">NX_Q9Y6F7</a>  | ENSG00000129873   | Testis-specific chromodoma    | CDY2A, CDY2B | Yq11.222   |       |          | yes        |              |                |                |         |         |              | Supported   | Group enriched,Tissue enri           | Detected in single,Detected | epididymis,testis                         |                                  |
| 356 | <a href="#">NX_P26371</a>  | ENSG00000254997   | Keratin-associated protein 5  | KRTAP5-9     | 11q13.4    |       |          |            | yes          |                | yes            |         | yes     |              | N/A         | Tissue enhanced                      | Detected in some            | epididymis,testis,urinary bladder         |                                  |
| 357 | <a href="#">NX_P21145</a>  | ENSG00000172005   | Myelin and lymphocyte prot    | MAL          | 2q11.1     |       |          |            |              | yes            | yes            |         | yes     |              | N/A         | Tissue enriched                      | Detected in many            | esophagus                                 |                                  |
| 358 | <a href="#">NX_E2RYF6</a>  | ENSG00000261272   | Mucin-22                      | MUC22        | 6p21.3     |       |          |            |              |                |                |         | yes     |              | N/A         | Tissue enriched                      | Detected in some            | esophagus                                 |                                  |
| 359 | <a href="#">NX_Q7X126</a>  | ENSG00000182938   | Proton channel OTOF3          | OTOF3        | 17q25.1    |       |          |            |              |                |                |         |         |              | N/A         | Group enriched                       | Detected in some            | esophagus,intestine                       |                                  |
| 360 | <a href="#">NX_Q95947</a>  | ENSG00000149922   | T-box transcription factor TB | TBX6         | 16p11.2    |       |          |            |              | yes            |                |         |         | yes          | N/A         | Tissue enhanced                      | Detected in many            | esophagus,lymphoid tissue,pancreas        |                                  |
| 361 | <a href="#">NX_Q9NZH7</a>  | ENSG00000136696   | Interleukin-36 beta           | IL36B        | 2q14.1     |       |          |            |              |                | yes            |         | yes     | yes          | Uncertain   | Group enriched                       | Detected in some            | esophagus,lymphoid tissue,skin 1          |                                  |
| 362 | <a href="#">NX_Q05066</a>  | ENSG00000184895   | Sex-determining region Y pr   | SRY          | Yp11.2     |       | yes      | yes        |              | yes            | yes            |         | yes     | yes          | N/A         | Group enriched                       | Detected in some            | esophagus,lymphoid tissue,skin 1,testis   |                                  |
| 363 | <a href="#">NX_O15353</a>  | ENSG00000109101   | Forkhead box protein N1       | FOXP1        | 17q11.2    |       |          | yes        |              |                |                |         | yes     |              | N/A         | Tissue enhanced                      | Detected in some            | esophagus,lymphoid tissue,skin 1,tongue   |                                  |
| 364 | <a href="#">NX_Q5YY80</a>  | ENSG00000155918   | UL16-binding protein 6        | RAET1L       | 6q25.1     |       |          | yes        | yes          | yes            |                |         | yes     |              | N/A         | Tissue enhanced                      | Detected in some            | esophagus,lymphoid tissue,tongue          |                                  |
| 365 | <a href="#">NX_P0DP57</a>  | ENSG00000283992   | Secreted Ly-6/uPAR domain     | SLURP2       | 8q24.3     |       |          | yes        | yes          |                |                | yes     | yes     |              | N/A         | Tissue enhanced                      | Detected in some            | esophagus,lymphoid tissue,tongue          |                                  |
| 366 | <a href="#">NX_Q96PD4</a>  | ENSG00000112116   | Interleukin-17F               | IL17F        | 6p12.2     | yes   | yes      | yes        | yes          |                | yes            | yes     | yes     |              | N/A         | Group enriched                       | Detected in some            | esophagus,lymphoid tissue,urinary bladder |                                  |
| 367 | <a href="#">NX_Q96QI5</a>  | ENSG00000162040   | Heparan sulfate glucosamin    | HS3ST6       | 16p13.3    |       |          |            |              |                |                |         | yes     |              | N/A         | Tissue enhanced                      | Detected in some            | esophagus,skin 1                          |                                  |
| 368 | <a href="#">NX_Q8N8X9</a>  | ENSG00000173212   | Protein mab-21-like 3         | MAB21L3      | 1p13.1     |       |          |            |              |                | yes            |         |         |              | Uncertain   | Tissue enhanced                      | Detected in many            | esophagus,skin 1                          |                                  |
| 369 | <a href="#">NX_Q6LXL0</a>  | ENSG00000174564   | Interleukin-20 receptor subu  | IL20RB       | 3q22.3     | yes   |          | yes        | yes          |                |                |         | yes     |              | N/A         | Tissue enhanced                      | Detected in many            | esophagus,skin 1                          |                                  |
| 370 | <a href="#">NX_Q8TDN7</a>  | ENSG00000167769   | Alkaline ceramidase 1         | ACER1        | 19p13.3    |       | yes      |            |              |                |                |         |         |              | N/A         | Group enriched                       | Detected in some            | esophagus,skin 1,tongue                   |                                  |
| 371 | <a href="#">NX_Q96LB9</a>  | ENSG00000159527   | Peptidoglycan recognition p   | PGLYRP3      | 1q21.3     |       |          | yes        | yes          |                |                | yes     | yes     |              | Uncertain   | Tissue enhanced                      | Detected in some            | esophagus,skin 1,vagina                   |                                  |
| 372 | <a href="#">NX_P14653</a>  | ENSG00000120094   | Homeobox protein Hox-B1       | HOXB1        | 17q21.32   |       | yes      | yes        |              |                |                |         | yes     | yes          | Uncertain   | Tissue enhanced                      | Detected in some            | esophagus,testis,urinary bladder          |                                  |
| 373 | <a href="#">NX_Q8N1N2</a>  | ENSG00000178690   | Dynactin-associated protein   | DYNAP        | 18q21.2    |       |          | yes        |              |                |                | yes     | yes     |              | Uncertain   | Group enriched                       | Detected in some            | esophagus,tongue                          |                                  |
| 374 | <a href="#">NX_Q9JUBK7</a> | ENSG00000144134   | Rab-like protein 2A           | RABL2A       | 2q14.1     |       |          |            |              | yes            |                |         |         |              | Approved    | Tissue enhanced                      | Detected in many            | fallopian tube                            |                                  |
| 375 | <a href="#">NX_P0C5J1</a>  | ENSG00000145002   | Putative protein N-methyltr   | FAM86B2      | 8p23.1     |       |          |            |              | yes            |                |         |         |              | Uncertain   | Tissue enhanced                      | Detected in many            | fallopian tube                            |                                  |
| 376 | <a href="#">NX_Q6UWJ8</a>  | ENSG00000174950   | CD164 sialomucin-like 2 pr    | CD164L2      | 1p36.11    |       |          |            |              |                | yes            |         |         |              | Enhanced    | Tissue enhanced                      | Detected in many            | fallopian tube                            |                                  |
| 377 | <a href="#">NX_P15382</a>  | ENSG00000180509   | Potassium voltage-gated ch    | KCNE1        | 21q22.12   |       | yes      | yes        | yes          | yes            | yes            |         | yes     | yes          | N/A         | Tissue enhanced                      | Detected in many            | fallopian tube                            |                                  |
| 378 | <a href="#">NX_Q8N841</a>  | ENSG00000170703   | Tubulin polyglutamylase T1    | TTL6         | 17q21.32   |       |          | yes        |              |                |                |         |         |              | Enhanced    | Tissue enhanced                      | Detected in some            | fallopian tube,intestine,testis           |                                  |
| 379 | <a href="#">NX_A6NCL1</a>  | ENSG00000205835   | Geminin coiled-coil domain-   | GMNC         | 3q28       |       |          |            |              |                |                |         |         |              | Uncertain   | Tissue enhanced                      | Detected in some            | fallopian tube,kidney,liver               |                                  |
| 380 | <a href="#">NX_Q8WZ04</a>  | ENSG00000184154   | Transmembrane O-methyltr      | LRTOMT       | 11q13.4    |       | yes      |            |              |                |                |         | yes     |              | Approved    | Tissue enhanced                      | Detected in all             | fallopian tube,testis                     |                                  |
| 381 | <a href="#">NX_Q56P42</a>  | ENSG00000253548   | Pyrin domain-containing pro   | PYDC2        | 3q28       |       |          |            | yes          |                | yes            |         | yes     |              | Uncertain   | Group enriched                       | Detected in some            | fallopian tube,testis                     |                                  |
| 382 | <a href="#">NX_P46663</a>  | ENSG00000100739   | B1 bradykinin receptor        | BDKRB1       | 14q32.2    |       |          |            |              | yes            |                |         | yes     |              | Approved    | Tissue enhanced                      | Detected in many            | gallbladder,lymphoid tissue               |                                  |
| 383 | <a href="#">NX_P13945</a>  | ENSG00000188778   | Beta-3 adrenergic receptor    | ADRB3        | 8p11.23    |       |          | yes        | yes          |                |                |         | yes     |              | Uncertain   | Tissue enhanced                      | Detected in many            | gallbladder,ovary,smooth muscle           |                                  |
| 384 | <a href="#">NX_P23945</a>  | ENSG00000170820   | Follicle-stimulating hormone  | FSHR         | 2p16.3     |       | yes      | yes        | yes          | yes            |                |         | yes     | yes          | N/A         | Tissue enhanced                      | Detected in some            | gallbladder,ovary,testis                  |                                  |
| 385 | <a href="#">NX_Q9JNA3</a>  | ENSG00000118017   | Alpha-1,4-N-acetylglucosam    | AAGNT        | 3q22.3     |       |          |            |              |                |                |         | yes     |              | Enhanced    | Group enriched                       | Detected in some            | gallbladder,pancreas,stomach 1            |                                  |
| 386 | <a href="#">NX_Q6LXT8</a>  | ENSG00000196711   | ALK and LTK ligand 1          | ALKAL1       | 8q11.23    |       |          |            |              | yes            |                |         | yes     |              | Uncertain   | Tissue enhanced                      | Detected in many            | gallbladder,prostate,urinary bladder      |                                  |
| 387 | <a href="#">NX_Q5Z337</a>  | ENSG00000152061   | Rab GTPase-activating prot    | RABGAP1L     | 1q25.1     |       |          |            |              |                |                |         |         |              | Uncertain   | Tissue enhanced                      | Detected in all             | heart muscle                              |                                  |
| 388 | <a href="#">NX_Q75838</a>  | ENSG00000136425   | Calcium and integrin-binding  | CIB2         | 15q25.1    |       | yes      |            | yes          |                |                |         | yes     | yes          | Approved    | Tissue enhanced                      | Detected in many            | heart muscle,intestine                    |                                  |
| 389 | <a href="#">NX_P51671</a>  | ENSG00000172156   | Eotaxin                       | CCL11        | 17q12      |       |          | yes        |              | yes            |                |         | yes     |              | N/A         | Tissue enhanced                      | Detected in many            | heart muscle,intestine,lymphoid tissue    |                                  |
| 390 | <a href="#">NX_Q99748</a>  | ENSG00000171119   | Neurturin                     | NRTN         | 19p13.3    |       | yes      | yes        | yes          |                |                |         | yes     |              | N/A         | Tissue enhanced                      | Detected in many            | heart muscle,pancreas                     |                                  |
| 391 | <a href="#">NX_Q95843</a>  | ENSG00000138472   | Guanylyl cyclase-activating   | GUCA1C       | 3q13.13    |       |          | yes        |              |                |                | yes     | yes     |              | Uncertain   | Group enriched                       | Detected in some            | heart muscle,pancreas,retina              |                                  |
| 392 | <a href="#">NX_Q04844</a>  | ENSG00000108556   | Acetylcholine receptor subu   | CHRNE        | 17p13.2    |       | yes      | yes        | yes          |                |                |         | yes     | yes          | N/A         | Group enriched                       | Detected in some            | heart muscle,pituitary gland              |                                  |
| 393 | <a href="#">NX_P08588</a>  | ENSG00000043591   | Beta-1 adrenergic receptor    | ADRB1        | 10q25.3    |       |          | yes        | yes          | yes            |                |         | yes     | yes          | Enhanced    | Tissue enhanced                      | Detected in many            | heart muscle,placenta                     |                                  |
| 394 | <a href="#">NX_P39877</a>  | ENSG00000127472   | Calcium-dependent phosph      | PLA2G5       | 1p36.13    |       | yes      | yes        |              |                | yes            | yes     | yes     |              | Approved    | Tissue enhanced                      | Detected in many            | heart muscle,retina                       |                                  |
| 395 | <a href="#">NX_Q14602</a>  | ENSG00000198692   | Eukaryotic translation initi  | EIF1AY       | Yq11.223   |       |          |            |              | yes            |                | yes     | yes     |              | Uncertain   | Tissue enhanced                      | Detected in many            | heart muscle,skeletal muscle              |                                  |
| 396 | <a href="#">NX_Q5VVY1</a>  | ENSG00000203740   | Alpha N-terminal protein me   | METTL1B      | 1q24.2     |       |          | yes        |              |                |                |         | yes     |              | Uncertain   | Group enriched                       | Detected in some            | heart muscle,skeletal muscle              |                                  |
| 397 | <a href="#">NX_Q8N112</a>  | ENSG00000179564   | Leucine-rich single-pass me   | LSMEM2       | 3p21.31    |       |          |            |              | yes            |                |         |         |              | N/A         | Group enriched                       | Detected in some            | heart muscle,skeletal muscle,tongue       |                                  |
| 398 | <a href="#">NX_C9JR72</a>  | ENSG00000234438   | Kelch repeat and BTB dom      | KBTBD13      | 15q22.31   |       | yes      | yes        | yes          |                |                | yes     | yes     |              | Uncertain   | Tissue enhanced                      | Detected in some            | heart muscle,skeletal muscle,tongue       |                                  |
| 399 | <a href="#">NX_Q95561</a>  | ENSG00000180999   | Uncharacterized protein C1    | C1orf105     | 1q24.3     |       |          |            |              | yes            |                |         |         |              | N/A         | Tissue enhanced                      | Detected in some            | heart muscle,testis                       |                                  |
| 400 | <a href="#">NX_Q9Y5Y9</a>  | ENSG00000185313   | Sodium channel protein typ    | SCN10A       | 3p22.2     |       | yes      |            |              | yes            |                |         | yes     | yes          | N/A         | Group enriched                       | Detected in some            | heart muscle,testis                       |                                  |
| 401 | <a href="#">NX_P41238</a>  | ENSG00000111701   | C->U-editing enzyme APOB      | APOBEC1      | 12p13.31   |       |          | yes        |              |                |                |         | yes     |              | N/A         | Tissue enriched                      | Detected in some            | intestine                                 |                                  |
| 402 | <a href="#">NX_Q9Y2M2</a>  | ENSG00000125046   | Protein SSUH2 homolog         | SSUH2        | 3p25.3     |       | yes      |            |              |                |                | yes     | yes     |              | Approved    | Tissue enriched                      | Detected in some            | intestine                                 |                                  |
| 403 | <a href="#">NX_Q12908</a>  | ENSG00000125255   | Ileal sodium/bile acid cotran | SLC10A2      | 13q33.1    |       | yes      | yes        |              |                | yes            |         | yes     | yes          | Approved    | Tissue enriched                      | Detected in some            | intestine                                 |                                  |
| 404 | <a href="#">NX_Q96PS8</a>  | ENSG00000143595   | Aquaporin-10                  | AQP10        | 1q21.3     |       |          | yes        | yes          | yes            | yes            | yes     | yes     | yes          | Enhanced    | Tissue enriched                      | Detected in some            | intestine                                 |                                  |
| 405 | <a href="#">NX_Q8NFR9</a>  | ENSG00000163701   | Interleukin-17 receptor E     | IL17RE       | 3p25.3     |       |          | yes        | yes          | yes            |                |         | yes     |              | Uncertain   | Tissue enhanced                      | Detected in many            | intestine                                 |                                  |
| 406 | <a href="#">NX_P36544</a>  | ENSG00000175344   | Neuronal acetylcholine rece   | CHRNA7       | 15q13.3    |       |          | yes        | yes          | yes            |                |         | yes     | yes          | Enhanced    | Tissue enhanced                      | Detected in many            | intestine                                 |                                  |
| 407 | <a href="#">NX_A5X5Y0</a>  | ENSG00000186038   | 5-hydroxytryptamine recept    | HTR3E        | 3q27.1     |       |          | yes        | yes          | yes            |                |         | yes     |              | Enhanced    | Tissue enriched                      | Detected in some            | intestine                                 |                                  |
| 408 | <a href="#">NX_P51582</a>  | ENSG00000186912   | P2Y purinoceptor 4            | P2RY4        | Xq13.1     |       |          | yes        |              |                |                | yes     | yes     | yes          | Uncertain   | Tissue enriched                      | Detected in some            | intestine                                 |                                  |
| 409 | <a href="#">NX_Q401N2</a>  |                   |                               |              |            |       |          |            |              |                |                |         |         |              |             |                                      |                             |                                           |                                  |

ST3\_Human Protein Atlas IHC and mRNA Data Added to neXtProt Data (ST2) for 950 Non-MS-Based neXtProt PE1 Proteins  
(ordered alphabetically by tissue with highest expression, Column S)

| 1   | A                          | B                 | C                                                            | D                    | E          | F     | G        | H          | I            | J              | K              | L       | M       | N            | O           | P                                    | Q                         | R                         | S                                           |
|-----|----------------------------|-------------------|--------------------------------------------------------------|----------------------|------------|-------|----------|------------|--------------|----------------|----------------|---------|---------|--------------|-------------|--------------------------------------|---------------------------|---------------------------|---------------------------------------------|
|     | accession code             | Ensembl gene code | protein name                                                 | gene name(s)         | chromosome | Edman | textbook | Disease mu | 3D structure | SP curated PPI | IntAct PPI GOL | Exp PTM | Ab info | Exp function | mutagenesis | Tissue Atlas reliability score HPA19 | Consensus RNA Specificity | Consensus Distribution    | Tissue(s) Most Enriched/Enhanced            |
| 427 | <a href="#">NX_Q43316</a>  | ENSG00000106331   | Paired box protein Pax-4                                     | PAX4                 | 7q32.1     |       |          | yes        |              |                |                |         |         | yes          | yes         | N/A                                  | Group enriched            | Detected in some          | intestine,testis                            |
| 428 | <a href="#">NX_A5D8T8</a>  | ENSG00000157322   | C-type lectin domain family 14 member C                      | CLEC18A              | 16q22.1    |       |          |            |              |                | yes            | yes     |         | yes          | yes         | Uncertain                            | Tissue enriched           | Detected in some          | kidney                                      |
| 429 | <a href="#">NX_Q8WUJ8</a>  | ENSG00000164325   | Transmembrane protein 174                                    | TMEM174              | 5q13.2     |       |          |            |              |                | yes            |         |         |              |             | Enhanced                             | Tissue enriched           | Detected in single        | kidney                                      |
| 430 | <a href="#">NX_Q6UJWW9</a> | ENSG00000198398   | Transmembrane protein 207                                    | TMEM207              | 3q28       |       |          |            | yes          | yes            |                |         | yes     |              | yes         | Uncertain                            | Tissue enriched           | Detected in single        | kidney                                      |
| 431 | <a href="#">NX_Q95045</a>  | ENSG00000007001   | Uridine phosphorylase 2                                      | UPP2                 | 2q24.1     |       |          |            | yes          |                | yes            | yes     |         | yes          | yes         | N/A                                  | Group enriched            | Detected in many          | kidney,liver                                |
| 432 | <a href="#">NX_Q14916</a>  | ENSG00000124568   | Sodium-dependent phosphate symporter                         | SLC17A1              | 6p22.2     |       |          |            |              |                |                |         |         | yes          | yes         | N/A                                  | Group enriched            | Detected in some          | kidney,liver                                |
| 433 | <a href="#">NX_Q9UJW3</a>  | ENSG00000142182   | DNA (cytosine-5)-methyltransferase 3A                        | DNMT3L               | 21q22.3    |       |          | yes        | yes          | yes            | yes            |         | yes     | yes          | yes         | Approved                             | Group enriched            | Detected in some          | kidney,liver                                |
| 434 | <a href="#">NX_Q0D2K3</a>  | ENSG00000147223   | Protein ripply1                                              | RIPPLY1              | Xq22.3     |       |          |            |              |                | yes            |         |         |              |             | Uncertain                            | Tissue enhanced           | Detected in some          | kidney,liver                                |
| 435 | <a href="#">NX_Q95500</a>  | ENSG00000159261   | Claudin-14                                                   | CLDN14               | 21q22.13   |       |          | yes        |              |                |                |         |         |              |             | N/A                                  | Group enriched            | Detected in some          | kidney,liver                                |
| 436 | <a href="#">NX_P13385</a>  | ENSG00000241186   | Teratocarcinoma-derived growth factor 1                      | TDGF1                | 3p21.31    | yes   |          |            | yes          | yes            | yes            |         | yes     | yes          | yes         | N/A                                  | Tissue enhanced           | Detected in some          | kidney,lymphoid tissue,ovary                |
| 437 | <a href="#">NX_Q96Q96</a>  | ENSG00000147613   | Serine/threonine-protein kinase                              | PSKH2                | 8q21.3     |       |          |            |              |                | yes            |         |         |              |             | Uncertain                            | Group enriched            | Detected in some          | kidney,placenta,testis                      |
| 438 | <a href="#">NX_Q14994</a>  | ENSG00000143257   | Nuclear receptor subfamily 1 group 1 member 3                | NR1I3                | 1q23.3     |       |          | yes        |              |                |                | yes     |         |              |             | N/A                                  | Tissue enriched           | Detected in some          | liver                                       |
| 439 | <a href="#">NX_Q8N681</a>  | ENSG00000180089   | Lysoplasmalogenase                                           | TMEM86B              | 19q13.42   |       |          |            |              |                | yes            |         |         |              |             | Uncertain                            | Tissue enhanced           | Detected in all           | liver                                       |
| 440 | <a href="#">NX_Q8NER1</a>  | ENSG00000196689   | Transient receptor potential channel 1                       | TRPV1                | 17p13.2    |       |          |            | yes          | yes            | yes            | yes     | yes     | yes          | yes         | N/A                                  | Tissue enhanced           | Detected in many          | liver                                       |
| 441 | <a href="#">NX_Q8HX05</a>  | ENSG00000241399   | CD302 antigen                                                | CD302                | 2q24.2     |       |          | yes        |              |                |                | yes     | yes     | yes          | yes         | N/A                                  | Tissue enhanced           | Detected in all           | liver                                       |
| 442 | <a href="#">NX_Q72410</a>  | ENSG00000178297   | Transmembrane protease serpin 9                              | TMPSR9               | 19p13.3    |       |          |            |              |                |                | yes     |         |              |             | Uncertain                            | Tissue enhanced           | Detected in some          | liver,lymphoid tissue,testis                |
| 443 | <a href="#">NX_P55318</a>  | ENSG00000170608   | Hepatocyte nuclear factor 3A                                 | FOXA3                | 19q13.32   |       |          | yes        | yes          |                |                |         |         | yes          |             | Uncertain                            | Tissue enhanced           | Detected in some          | liver,pancreas                              |
| 444 | <a href="#">NX_Q86UJ9</a>  | ENSG00000176358   | Tachykinin-4                                                 | TAC4                 | 17q21.33   |       |          | yes        |              |                |                |         |         | yes          |             | N/A                                  | Tissue enhanced           | Detected in some          | liver,pituitary gland                       |
| 445 | <a href="#">NX_Q6ZQW0</a>  | ENSG00000188676   | Indoleamine 2,3-dioxygenase 1                                | IDO2                 | 8p11.21    |       | yes      |            |              |                |                |         |         | yes          |             | N/A                                  | Group enriched            | Detected in some          | liver,placenta                              |
| 446 | <a href="#">NX_Q6L8G9</a>  | ENSG00000205864   | Keratin-associated protein 5                                 | KRTAP5-6             | 11p15.5    |       |          |            | yes          | yes            | yes            |         |         | yes          | yes         | N/A                                  | Group enriched            | Detected in some          | liver,placenta,skin 1                       |
| 447 | <a href="#">NX_P30301</a>  | ENSG00000135517   | Lens fiber major intrinsic protein                           | MIP                  | 12q13.3    |       |          | yes        |              | yes            |                | yes     |         | yes          | yes         | Supported                            | Tissue enhanced           | Detected in some          | liver,retina,testis                         |
| 448 | <a href="#">NX_Q5MJ68</a>  | ENSG00000204710   | Speedy protein C                                             | SPDYC                | 11q13.1    |       |          |            | yes          | yes            | yes            |         |         | yes          |             | Uncertain                            | Group enriched            | Detected in some          | liver,testis                                |
| 449 | <a href="#">NX_Q8WXA8</a>  | ENSG00000178084   | 5-hydroxytryptamine receptor 2A                              | HTR2C                | 3q27.1     |       |          |            | yes          | yes            | yes            |         |         | yes          |             | N/A                                  | Tissue enriched           | Detected in some          | lung                                        |
| 450 | <a href="#">NX_Q6ZNE9</a>  | ENSG00000188282   | RUN and FYVE domain-containing protein 1                     | RUFY4                | 2q35       |       |          |            | yes          | yes            | yes            |         |         | yes          |             | Uncertain                            | Tissue enhanced           | Detected in some          | lung,lymphoid tissue                        |
| 451 | <a href="#">NX_P43628</a>  | ENSG00000243772   | Killer cell immunoglobulin-like receptor 1                   | KIR2DL3              | 19q13.42   |       |          | yes        | yes          | yes            | yes            |         |         | yes          |             | N/A                                  | Tissue enhanced           | Detected in some          | lung,lymphoid tissue                        |
| 452 | <a href="#">NX_P24903</a>  | ENSG00000197446   | Cytochrome P450 2F1                                          | CYP2F1               | 19q13.2    |       |          |            |              |                |                |         |         | yes          |             | N/A                                  | Tissue enhanced           | Detected in some          | lung,lymphoid tissue,pituitary gland,testis |
| 453 | <a href="#">NX_P0C7M3</a>  | ENSG00000229415   | Surfactant-associated protein 2                              | SFTA3                | 14q13.3    |       |          |            |              |                |                |         | yes     | yes          |             | N/A                                  | Group enriched            | Detected in some          | lung,thyroid gland                          |
| 454 | <a href="#">NX_P06899</a>  | ENSG00000124635   | Histone H2B type 1-J                                         | HIST1H2BJ            | 6p22.1     | yes   |          | yes        | yes          | yes            | yes            | yes     | yes     | yes          | yes         | Supported                            | Tissue enriched           | Detected in many          | lymphoid tissue                             |
| 455 | <a href="#">NX_Q13349</a>  | ENSG00000156886   | Integrin alpha-D                                             | ITGAD                | 16p11.2    |       |          | yes        |              | yes            |                |         |         | yes          |             | Uncertain                            | Tissue enriched           | Detected in some          | lymphoid tissue                             |
| 456 | <a href="#">NX_Q86WD7</a>  | ENSG00000170054   | Serpin A9                                                    | SERPINA9             | 14q32.13   |       |          |            |              |                |                |         |         | yes          |             | N/A                                  | Tissue enriched           | Detected in some          | lymphoid tissue                             |
| 457 | <a href="#">NX_P00594</a>  | ENSG00000173578   | Chemokine XC receptor 1                                      | XCR1                 | 3p21.31    |       |          |            |              |                |                |         |         |              |             | Uncertain                            | Tissue enhanced           | Detected in many          | lymphoid tissue                             |
| 458 | <a href="#">NX_P51686</a>  | ENSG00000173585   | C-C chemokine receptor type 4                                | CCR9                 | 3p21.31    |       |          | yes        |              |                |                |         |         | yes          |             | Uncertain                            | Tissue enriched           | Detected in some          | lymphoid tissue                             |
| 459 | <a href="#">NX_P55895</a>  | ENSG00000175097   | V(D)J recombination-activating protein 2                     | RAG2                 | 11p12      |       |          | yes        |              |                |                |         |         |              |             | N/A                                  | Tissue enriched           | Detected in some          | lymphoid tissue                             |
| 460 | <a href="#">NX_Q8N144</a>  | ENSG00000183153   | Gap junction delta-3 protein                                 | GJD3                 | 17q21.2    |       |          |            | yes          | yes            | yes            |         | yes     |              |             | N/A                                  | Tissue enhanced           | Detected in many          | lymphoid tissue                             |
| 461 | <a href="#">NX_Q16778</a>  | ENSG00000184678   | Histone H2B type 2-E                                         | HIST2H2BE            | 1q21.2     | yes   |          | yes        | yes          | yes            | yes            | yes     | yes     | yes          | yes         | Supported                            | Tissue enhanced           | Detected in all           | lymphoid tissue                             |
| 462 | <a href="#">NX_Q5TA77</a>  | ENSG00000187238   | Late cornified envelope protein 3                            | LCE3B                | 1q21.3     |       |          |            |              | yes            |                |         |         | yes          |             | N/A                                  | Tissue enriched           | Detected in single        | lymphoid tissue                             |
| 463 | <a href="#">NX_P0C058</a>  | ENSG00000196747   | Histone H2A type 1                                           | H2AC11, H2AC11       | 6p22.1     |       |          | yes        | yes          | yes            | yes            | yes     | yes     | yes          | yes         | Supported                            | Tissue enriched           | Detected in many          | lymphoid tissue                             |
| 464 | <a href="#">NX_P20671</a>  | ENSG00000196866   | Histone H2A type 1-D                                         | HIST1H2AD            | 6p22.2     |       |          | yes        | yes          | yes            | yes            | yes     | yes     | yes          | yes         | Supported                            | Tissue enriched           | Detected in all           | lymphoid tissue                             |
| 465 | <a href="#">NX_Q60814</a>  | ENSG00000197903   | Histone H2B type 1-K                                         | HIST1H2BK            | 6p22.1     | yes   |          | yes        | yes          | yes            | yes            | yes     | yes     | yes          | yes         | Supported                            | Tissue enriched           | Detected in many          | lymphoid tissue                             |
| 466 | <a href="#">NX_A5LHX3</a>  | ENSG00000222028   | Proteasome subunit beta type 1                               | PSMB11               | 14q11.2    |       |          |            | yes          | yes            |                |         | yes     |              |             | Enhanced                             | Tissue enriched           | Detected in some          | lymphoid tissue                             |
| 467 | <a href="#">NX_Q85249</a>  | ENSG00000250254   | Securin-2                                                    | PTTG2                | 4p14       |       |          |            |              |                |                |         |         |              |             | Uncertain                            | Tissue enhanced           | Detected in many          | lymphoid tissue                             |
| 468 | <a href="#">NX_P04001</a>  | ENSG00000268221   | Medium-wave-sensitive ops                                    | OPN1MW               | Xq28       |       |          | yes        | yes          | yes            | yes            | yes     | yes     | yes          | yes         | N/A                                  | Tissue enhanced           | Detected in single        | lymphoid tissue                             |
| 469 | <a href="#">NX_P23527</a>  | ENSG00000274641   | Histone H2B type 1-O                                         | HIST1H2BO            | 6p22.1     | yes   |          |            | yes          | yes            | yes            | yes     | yes     | yes          | yes         | Supported                            | Tissue enriched           | Detected in many          | lymphoid tissue                             |
| 470 | <a href="#">NX_Q96KJ5</a>  | ENSG00000274997   | Histone H2A type 1-H                                         | HIST1H2AH            | 6p22.1     |       |          |            | yes          | yes            | yes            | yes     | yes     | yes          | yes         | Supported                            | Tissue enriched           | Detected in many          | lymphoid tissue                             |
| 471 | <a href="#">NX_Q93079</a>  | ENSG00000275713   | Histone H2B type 1-H                                         | HIST1H2BH            | 6p22.2     | yes   |          |            | yes          | yes            | yes            | yes     | yes     | yes          | yes         | Supported                            | Tissue enriched           | Detected in many          | lymphoid tissue                             |
| 472 | <a href="#">NX_P33778</a>  | ENSG00000276410   | Histone H2B type 1-B                                         | HIST1H2BB            | 6p22.2     |       |          | yes        | yes          | yes            | yes            | yes     | yes     | yes          | yes         | Supported                            | Tissue enriched           | Detected in some          | lymphoid tissue                             |
| 473 | <a href="#">NX_P04908</a>  | ENSG00000277075   | Histone H2A type 1-B/E                                       | HIST1H2AB, HIST1H2AE | 6p22.2     |       |          | yes        | yes          | yes            | yes            | yes     | yes     | yes          | yes         | Supported                            | Tissue enriched           | Detected in many,Detected | lymphoid tissue                             |
| 474 | <a href="#">NX_Q2WEN9</a>  | ENSG00000213892   | Carcinoembryonic antigen-related cell adhesion molecule 1    | CEACAM16             | 19q13.31   |       |          | yes        | yes          | yes            | yes            | yes     | yes     | yes          | yes         | Uncertain                            | Tissue enhanced           | Detected in some          | lymphoid tissue,pancreas                    |
| 475 | <a href="#">NX_Q9UJ33</a>  | ENSG00000168356   | Sodium channel protein type beta subunit 11A                 | SCN11A               | 3p22.2     |       |          | yes        |              |                |                |         |         | yes          | yes         | Uncertain                            | Tissue enhanced           | Detected in some          | lymphoid tissue,placenta                    |
| 476 | <a href="#">NX_Q5T215</a>  | ENSG00000173626   | Trafficking protein particle complex 3                       | TRAPPC3L             | 6q22.1     |       |          |            | yes          | yes            |                |         |         |              |             | N/A                                  | Tissue enhanced           | Detected in many          | lymphoid tissue,placenta                    |
| 477 | <a href="#">NX_Q6UJ39</a>  | ENSG00000187689   | Amelotin                                                     | AMTN                 | 4q13.3     | yes   |          |            |              |                | yes            | yes     | yes     | yes          | yes         | Uncertain                            | Group enriched            | Detected in some          | lymphoid tissue,salivary gland,stomach 1    |
| 478 | <a href="#">NX_Q9Y5X5</a>  | ENSG00000056291   | Neuropeptide FF receptor 2                                   | NPF2R2               | 4q13.3     |       |          |            |              |                |                |         |         | yes          |             | N/A                                  | Tissue enhanced           | Detected in many          | lymphoid tissue,seminal vesicle             |
| 479 | <a href="#">NX_Q9NZK7</a>  | ENSG00000188784   | Group IIE secretory phospholipase A2                         | PLA2G2E              | 1p36.13    |       |          |            |              |                |                |         |         | yes          |             | Uncertain                            | Group enriched            | Detected in some          | lymphoid tissue,skin 1                      |
| 480 | <a href="#">NX_B7U540</a>  | ENSG00000260458   | Inward rectifier potassium channel 18                        | KCNJ18               | 17p11.2    |       |          | yes        |              |                |                | yes     |         | yes          | yes         | Uncertain                            | Group enriched            | Detected in some          | lymphoid tissue,skin 1                      |
| 481 | <a href="#">NX_Q95932</a>  | ENSG00000166948   | Protein-glutamine gamma-glutamyl cyclotransferase 2          | TGM6                 | 20p13      |       |          | yes        |              |                |                |         |         | yes          | yes         | Uncertain                            | Group enriched            | Detected in some          | lymphoid tissue,skin 1,tongue               |
| 482 | <a href="#">NX_Q9BZM2</a>  | ENSG00000158786   | Group IIF secretory phospholipase A2                         | PLA2G2F              | 1p36.12    |       |          |            |              |                |                |         |         | yes          |             | N/A                                  | Tissue enhanced           | Detected in some          | lymphoid tissue,skin 1,urinary bladder      |
| 483 | <a href="#">NX_Q72443</a>  | ENSG00000277481   | Polycystic kidney disease protein 1                          | PKD1L3               | 16q22.2    |       |          |            | yes          | yes            |                |         |         | yes          |             | N/A                                  | Tissue enhanced           | Detected in some          | lymphoid tissue,smooth muscle,testis        |
| 484 | <a href="#">NX_Q60882</a>  | ENSG00000137674   | Matrix metalloproteinase-20                                  | MMP20                | 11q22.2    |       |          | yes        |              |                |                |         |         | yes          |             | N/A                                  | Tissue enhanced           | Detected in some          | lymphoid tissue,testis                      |
| 485 | <a href="#">NX_Q95932</a>  | ENSG00000284622   | Small cysteine and glycine rich domain-containing protein 10 | SCYGR10              | 2q36.3     |       |          |            |              |                |                |         |         |              |             | N/A                                  | Group enriched            | Detected in some          | lymphoid tissue,testis                      |
| 486 | <a href="#">NX_Q515A8</a>  | ENSG00000244057   | Late cornified envelope protein 3                            | LCE3C                | 1q21.3     |       |          |            |              | yes            |                |         |         | yes          |             | N/A                                  | Group enriched            | Detected in some          | lymphoid tissue,tongue                      |
| 487 | <a href="#">NX_Q9NPH9</a>  | ENSG00000111536   | Interleukin-26                                               | IL26                 | 12q15      |       |          |            |              | yes            |                |         | yes     | yes          | yes         | N/A                                  | Tissue enhanced           | Detected in some          | lymphoid tissue,tongue,urinary bladder      |
| 488 | <a href="#">NX_Q8IYD2</a>  | ENSG00000162873   | Kelch domain-containing protein 8A                           | KLHDC8A              | 1q32.1     |       |          |            |              |                |                |         |         |              |             | N/A                                  | Tissue enriched           | Detected in many          | ovary                                       |
| 489 | <a href="#">NX_Q8IZY5</a>  | ENSG00000259571   | BH3-like motif-containing protein 1                          | BLID                 | 11q24.1    |       |          |            |              |                |                |         |         | yes          | yes         | N/A                                  | Tissue enhanced           | Detected in some          | ovary                                       |
| 490 | <a href="#">NX_Q9Y258</a>  | ENSG00000006606   | C-C motif chemokine 26                                       | CCL26                | 7q11.23    | yes   |          | yes        | yes          | yes            | yes            | yes     | yes     | yes          | yes         | N/A                                  | Tissue enhanced           | Detected in many          | ovary,retina                                |
| 491 | <a href="#">NX_P58294</a>  | ENSG00000143125   | Prokineticin-1                                               | PROK1                | 1p13.3     | yes   |          |            |              |                |                |         | yes     | yes          | yes         | N/A                                  | Group enriched            | Detected in many          |                                             |

ST3\_Human Protein Atlas IHC and mRNA Data Added to neXtProt Data (ST2) for 950 Non-MS-Based neXtProt PE1 Proteins  
(ordered alphabetically by tissue with highest expression, Column S)

| 1   | A                         | B                    | C                             | D             | E          | F     | G        | H          | I            | J              | K              | L       | M       | N            | O           | P                                    | Q                          | R                      | S                                |
|-----|---------------------------|----------------------|-------------------------------|---------------|------------|-------|----------|------------|--------------|----------------|----------------|---------|---------|--------------|-------------|--------------------------------------|----------------------------|------------------------|----------------------------------|
|     | accession code            | Ensembl gene code    | protein name                  | gene name(s)  | chromosome | Edman | textbook | Disease mu | 3D structure | SP curated PPI | IntAct PPI GOL | Exp PTM | Ab info | Exp function | mutagenesis | Tissue Atlas reliability score HPA19 | Consensus RNA Specificity  | Consensus Distribution | Tissue(s) Most Enriched/Enhanced |
| 512 | <a href="#">NX_Q02643</a> | ENSG00000106128      | Growth hormone-releasing      | GHRHR         | 7p14.3     |       |          | yes        | yes          |                |                |         |         | yes          |             | N/A                                  | Tissue enriched            | Detected in some       | pituitary gland                  |
| 513 | <a href="#">NX_P30968</a> | ENSG00000109163      | Gonadotropin-releasing hori   | GNRHR         | 4q13.2     |       |          | yes        |              |                |                |         |         | yes          | yes         | Enhanced                             | Tissue enriched            | Detected in some       | pituitary gland                  |
| 514 | <a href="#">NX_Q9HD90</a> | ENSG00000123307      | Neurogenic differentiation fa | NEUROD4       | 12q13.2    |       |          |            |              |                | yes            |         |         |              |             | Enhanced                             | Tissue enriched            | Detected in some       | pituitary gland                  |
| 515 | <a href="#">NX_Q60806</a> | ENSG00000143178      | T-box transcription factor TB | TBX19         | 1q24.2     |       |          | yes        |              |                |                |         |         | yes          |             | Enhanced                             | Tissue enriched            | Detected in many       | pituitary gland                  |
| 516 | <a href="#">NX_Q8NDQ6</a> | ENSG00000171817      | Zinc finger protein 540       | ZNF540        | 19q13.12   |       |          |            |              | yes            |                |         |         | yes          |             | Supported                            | Tissue enhanced            | Detected in all        | pituitary gland                  |
| 517 | <a href="#">NX_Q75360</a> | ENSG00000175325      | Homeobox protein prophet      | PROP1         | 5q35.3     |       |          |            |              |                |                |         | yes     | yes          |             | Enhanced                             | Tissue enriched            | Detected in single     | pituitary gland                  |
| 518 | <a href="#">NX_P0DN86</a> | ENSG00000104827,ENSG | Choriogonadotropin subunit    | CGB3, CGB5, C | 19q13.33   | yes   |          |            | yes          | yes            |                | yes     |         | yes          |             | Enhanced,Supported                   | Group enriched,Tissue enha | Detected in some       | pituitary gland,placenta         |
| 519 | <a href="#">NX_Q95257</a> | ENSG00000130222      | Growth arrest and DNA dan     | GADD45G       | 9q22.2     |       |          |            | yes          | yes            |                |         |         | yes          | yes         | Approved                             | Tissue enhanced            | Detected in all        | placenta                         |
| 520 | <a href="#">NX_P41595</a> | ENSG00000135914      | 5-hydroxytryptamine recept    | HTR2B         | 2q37.1     |       |          |            | yes          | yes            |                |         |         | yes          | yes         | Enhanced                             | Tissue enhanced            | Detected in many       | placenta                         |
| 521 | <a href="#">NX_P0DML2</a> | ENSG00000136488      | Chorionic somatomammotr       | CSH1          | 17q23.3    | yes   |          |            | yes          | yes            |                | yes     |         | yes          |             | Enhanced                             | Tissue enriched            | Detected in some       | placenta                         |
| 522 | <a href="#">NX_Q96P69</a> | ENSG00000155269      | G-protein coupled receptor    | GPR78         | 4p16.1     |       |          |            |              |                |                |         | yes     | yes          |             | Uncertain                            | Tissue enriched            | Detected in some       | placenta                         |
| 523 | <a href="#">NX_P46091</a> | ENSG00000183671      | G-protein coupled receptor    | GPR1          | 2q33.3     |       |          |            |              |                |                |         | yes     |              |             | Uncertain                            | Tissue enhanced            | Detected in many       | placenta                         |
| 524 | <a href="#">NX_P0DML3</a> | ENSG00000213218      | Chorionic somatomammotr       | CSH2          | 17q23.3    | yes   |          |            | yes          | yes            |                | yes     |         | yes          |             | Supported                            | Tissue enriched            | Detected in some       | placenta                         |
| 525 | <a href="#">NX_A05309</a> | ENSG00000284667      | Small cysteine and glycine r  | SCYGR5        | 2q36.3     |       |          |            |              |                |                |         |         |              |             | N/A                                  | Tissue enriched            | Detected in single     | placenta                         |
| 526 | <a href="#">NX_A05289</a> | ENSG00000284704      | Small cysteine and glycine r  | SCYGR3        | 2q36.3     |       |          |            |              |                |                |         |         |              |             | N/A                                  | Tissue enriched            | Detected in single     | placenta                         |
| 527 | <a href="#">NX_P0DMC3</a> | ENSG00000248329      | Apelin receptor early endog   | APELA         | 4q32.3     |       |          |            |              | yes            |                | yes     | yes     |              |             | N/A                                  | Tissue enhanced            | Detected in some       | placenta,prostate                |
| 528 | <a href="#">NX_Q2M3T9</a> | ENSG00000106302      | Hyaluronidase-4               | HYAL4         | 7q31.32    |       |          |            |              |                |                | yes     |         | yes          |             | Uncertain                            | Tissue enhanced            | Detected in some       | placenta,skeletal muscle         |
| 529 | <a href="#">NX_Q92988</a> | ENSG00000108813      | Homeobox protein DLX-4        | DLX4          | 17q21.33   |       |          |            |              |                | yes            |         |         | yes          |             | Uncertain                            | Tissue enhanced            | Detected in some       | placenta,skin 1                  |
| 530 | <a href="#">NX_P0C7Q2</a> | ENSG00000254636      | Age-related maculopathy su    | ARMS2         | 10q26.13   |       |          |            |              |                |                | yes     | yes     | yes          |             | Enhanced                             | Group enriched             | Detected in some       | placenta,testis                  |
| 531 | <a href="#">NX_Q9Y5K2</a> | ENSG00000167749      | Kallikrein-4                  | KLK4          | 19q13.41   | yes   |          |            | yes          |                |                |         | yes     | yes          |             | Enhanced                             | Tissue enriched            | Detected in some       | prostate                         |
| 532 | <a href="#">NX_Q6S545</a> | ENSG00000198062      | POTE ankyrin domain fami      | POTEH         | 22q11.1    |       |          |            |              |                | yes            |         |         |              |             | N/A                                  | Group enriched             | Detected in some       | prostate,testis                  |
| 533 | <a href="#">NX_P04000</a> | ENSG00000102076      | Long-wave-sensitive opsin     | OPN1LW        | Xq28       |       |          | yes        | yes          |                |                | yes     | yes     | yes          |             | N/A                                  | Tissue enriched            | Detected in some       | retina                           |
| 534 | <a href="#">NX_P54845</a> | ENSG00000129535      | Neural retina-specific leucin | NRL           | 14q11.2    |       |          | yes        |              | yes            | yes            | yes     | yes     | yes          | yes         | Enhanced                             | Tissue enriched            | Detected in many       | retina                           |
| 535 | <a href="#">NX_Q13956</a> | ENSG00000139053      | Retinal cone rhodopsin-sen    | PDE6H         | 12p12.3    |       |          |            |              | yes            | yes            |         | yes     |              |             | Supported                            | Tissue enriched            | Detected in some       | retina                           |
| 536 | <a href="#">NX_Q95076</a> | ENSG00000156150      | Homeobox protein aristaless   | ALX3          | 1p13.3     |       | yes      |            |              |                |                |         |         |              |             | N/A                                  | Tissue enhanced            | Detected in many       | retina                           |
| 537 | <a href="#">NX_Q00254</a> | ENSG00000164220      | Proteinase-activated recept   | F2RL2         | 5q13.3     |       |          |            | yes          | yes            |                | yes     | yes     | yes          |             | N/A                                  | Tissue enhanced            | Detected in many       | retina                           |
| 538 | <a href="#">NX_Q9NPB3</a> | ENSG00000167791      | Calcium-binding protein 2     | CABP2         | 11q13.2    |       | yes      |            |              |                |                | yes     |         |              |             | N/A                                  | Tissue enriched            | Detected in some       | retina                           |
| 539 | <a href="#">NX_Q8TDN1</a> | ENSG00000168418      | Potassium voltage-gated ch    | KCNQ4         | 16q24.1    |       |          |            | yes          |                |                |         | yes     |              |             | N/A                                  | Tissue enhanced            | Detected in some       | retina                           |
| 540 | <a href="#">NX_Q9NQW8</a> | ENSG00000170289      | Cyclic nucleotide-gated cati  | CNGB3         | 8q21.3     |       |          | yes        | yes          |                |                |         | yes     |              |             | Enhanced                             | Tissue enriched            | Detected in some       | retina                           |
| 541 | <a href="#">NX_A6NGG8</a> | ENSG00000179270      | Photoreceptor cilium actin r  | PCARE         | 2p23.2     |       |          | yes        |              |                |                |         | yes     |              |             | N/A                                  | Tissue enriched            | Detected in some       | retina                           |
| 542 | <a href="#">NX_Q5T1H1</a> | ENSG00000188107      | Protein eyes shut homolog     | EYS           | 6q12       |       |          | yes        |              |                |                |         | yes     |              |             | N/A                                  | Tissue enriched            | Detected in some       | retina                           |
| 543 | <a href="#">NX_Q00L71</a> | ENSG00000214140      | Photoreceptor disk compon     | PRCD          | 17q25.1    |       |          | yes        |              |                |                | yes     |         | yes          |             | N/A                                  | Tissue enriched            | Detected in many       | retina                           |
| 544 | <a href="#">NX_Q5T197</a> | ENSG00000163357      | E3 ubiquitin-protein ligase   | DCST1         | 1q21.3     |       |          |            | yes          |                |                |         | yes     |              |             | Uncertain                            | Group enriched             | Detected in some       | retina,skin 1,testis             |
| 545 | <a href="#">NX_Q16613</a> | ENSG00000129673      | Serotonin N-acetyltransfera   | AANAT         | 17q25.1    |       | yes      |            |              | yes            |                | yes     | yes     | yes          |             | N/A                                  | Group enriched             | Detected in some       | retina,testis                    |
| 546 | <a href="#">NX_P43026</a> | ENSG00000125965      | Growth/differentiation factor | GDF5          | 20q11.22   |       | yes      | yes        | yes          | yes            |                | yes     | yes     | yes          |             | Uncertain                            | Tissue enhanced            | Detected in some       | salivary gland                   |
| 547 | <a href="#">NX_Q9NRQ5</a> | ENSG00000166002      | Single-pass membrane and      | SMCO4         | 11q21      |       |          |            |              | yes            |                |         |         |              |             | Uncertain                            | Tissue enhanced            | Detected in all        | salivary gland                   |
| 548 | <a href="#">NX_Q8TDE3</a> | ENSG00000173431      | Ribonuclease 8                | RNASE8        | 14q11.2    |       |          |            |              |                |                |         |         | yes          |             | N/A                                  | Tissue enriched            | Detected in single     | salivary gland                   |
| 549 | <a href="#">NX_A8MXD5</a> | ENSG00000215203      | Glutaredoxin domain-contain   | GRXCR1        | 4p13       |       | yes      |            |              |                |                |         |         |              |             | Uncertain                            | Tissue enriched            | Detected in some       | seminal vesicle                  |
| 550 | <a href="#">NX_Q95868</a> | ENSG00000244355      | Lymphocyte antigen 6 comp     | LY6G6D        | 6p21.33    |       |          |            | yes          |                |                | yes     |         |              |             | Uncertain                            | Tissue enhanced            | Detected in some       | seminal vesicle,skin 1           |
| 551 | <a href="#">NX_Q15146</a> | ENSG00000303034      | Muscle, skeletal receptor ty  | MUSK          | 9q31.3     |       | yes      |            |              | yes            |                | yes     | yes     | yes          |             | N/A                                  | Tissue enriched            | Detected in many       | skeletal muscle                  |
| 552 | <a href="#">NX_Q15547</a> | ENSG00000099957      | P2X purinoceptor 6            | P2RX6         | 22q11.21   |       |          |            | yes          |                |                | yes     |         |              |             | Approved                             | Tissue enhanced            | Detected in some       | skeletal muscle                  |
| 553 | <a href="#">NX_P55075</a> | ENSG00000107831      | Fibroblast growth factor 8    | FGF8          | 10q24.32   |       | yes      | yes        | yes          |                |                |         | yes     |              |             | N/A                                  | Tissue enriched            | Detected in some       | skeletal muscle                  |
| 554 | <a href="#">NX_P23409</a> | ENSG00000111046      | Myogenic factor 6             | MYF6          | 12q21.31   |       | yes      |            |              |                |                |         | yes     |              |             | N/A                                  | Tissue enriched            | Detected in some       | skeletal muscle                  |
| 555 | <a href="#">NX_Q11203</a> | ENSG00000126091      | CMP-N-acetylneuraminat        | ST3GAL3       | 1p34.1     |       | yes      |            |              |                |                | yes     |         | yes          |             | Uncertain                            | Tissue enhanced            | Detected in all        | skeletal muscle                  |
| 556 | <a href="#">NX_P15172</a> | ENSG00000129152      | Myoblast determination prot   | MYOD1         | 11p15.1    |       |          |            | yes          | yes            |                | yes     |         |              |             | N/A                                  | Tissue enriched            | Detected in some       | skeletal muscle                  |
| 557 | <a href="#">NX_Q9GZ76</a> | ENSG00000129749      | Neuronal acetylcholine rece   | CHRNA10       | 11p15.4    |       |          |            | yes          |                |                |         | yes     | yes          |             | N/A                                  | Tissue enriched            | Detected in some       | skeletal muscle                  |
| 558 | <a href="#">NX_Q07001</a> | ENSG00000135902      | Acetylcholine receptor subu   | CHRND         | 2q37.1     |       |          | yes        | yes          |                |                |         | yes     | yes          |             | N/A                                  | Tissue enriched            | Detected in some       | skeletal muscle                  |
| 559 | <a href="#">NX_P02708</a> | ENSG00000138435      | Acetylcholine receptor subu   | CHRNA1        | 2q31.1     | yes   |          | yes        | yes          |                |                | yes     | yes     | yes          |             | Enhanced                             | Tissue enriched            | Detected in some       | skeletal muscle                  |
| 560 | <a href="#">NX_Q6ZQY3</a> | ENSG00000144644      | Acidic amino acid decarbox    | GADL1         | 3p23       |       |          |            |              |                |                |         | yes     |              |             | Uncertain                            | Tissue enriched            | Detected in many       | skeletal muscle                  |
| 561 | <a href="#">NX_Q96D03</a> | ENSG00000145358      | DNA damage-inducible tran     | DDIT4L        | 4q24       |       |          |            |              |                |                |         | yes     |              |             | N/A                                  | Tissue enriched            | Detected in many       | skeletal muscle                  |
| 562 | <a href="#">NX_Q86SG2</a> | ENSG00000163126      | Ankyrin repeat domain-cont    | ANKRD23       | 2q11.2     |       |          |            | yes          |                |                |         | yes     |              |             | Approved                             | Tissue enriched            | Detected in some       | skeletal muscle                  |
| 563 | <a href="#">NX_P55089</a> | ENSG00000163794      | Urocortin                     | UCN           | 2p23.3     |       |          | yes        | yes          |                |                | yes     | yes     | yes          |             | Approved                             | Tissue enhanced            | Detected in many       | skeletal muscle                  |
| 564 | <a href="#">NX_P62952</a> | ENSG00000166619      | Bladder cancer-associated     | BLCAP         | 20q11.23   |       |          |            |              | yes            |                |         | yes     |              |             | N/A                                  | Tissue enhanced            | Detected in all        | skeletal muscle                  |
| 565 | <a href="#">NX_Q00631</a> | ENSG00000170290      | Sarcolipin                    | SLN           | 11q22.3    |       |          | yes        |              |                |                |         | yes     |              |             | N/A                                  | Tissue enriched            | Detected in some       | skeletal muscle                  |
| 566 | <a href="#">NX_Q9BQ31</a> | ENSG00000170745      | Potassium voltage-gated ch    | KCNS3         | 2p24.2     |       |          |            | yes          |                |                |         | yes     | yes          |             | Approved                             | Tissue enhanced            | Detected in many       | skeletal muscle                  |
| 567 | <a href="#">NX_P55916</a> | ENSG00000175564      | Mitochondrial uncoupling pr   | UCP3          | 11q13.4    |       | yes      |            |              |                |                |         | yes     |              |             | Enhanced                             | Tissue enriched            | Detected in some       | skeletal muscle                  |
| 568 | <a href="#">NX_Q2WJG6</a> | ENSG00000175946      | Kelch-like protein 38         | KLHL38        | 8q24.13    |       |          |            |              | yes            |                |         |         |              |             | Uncertain                            | Tissue enriched            | Detected in some       | skeletal muscle                  |
| 569 | <a href="#">NX_Q6SJ96</a> | ENSG00000182521      | TATA box-binding protein-lik  | TBPL2         | 14q22.3    |       |          |            |              |                |                | yes     |         |              |             | Uncertain                            | Tissue enhanced            | Detected in some       | skeletal muscle                  |
| 570 | <a href="#">NX_Q9Y3D7</a> | ENSG00000217930      | Mitochondrial import inner m  | PAM16         | 16p13.3    |       | yes      |            | yes          | yes            |                |         | yes     | yes          |             | N/A                                  | Tissue enhanced            | Detected in all        | skeletal muscle                  |
| 571 | <a href="#">NX_P35125</a> | ENSG00000129204      | Ubiquitin carboxyl-terminal   | USP6          | 17p13.2    |       |          |            | yes          | yes            |                | yes     | yes     | yes          |             | N/A                                  | Group enriched             | Detected in some       | skeletal muscle,testis           |
| 572 | <a href="#">NX_Q5QG77</a> | ENSG00000198471      | Receptor-transporting prote   | RTP2          | 3q27.3     |       |          |            |              | yes            |                |         |         |              |             | N/A                                  | Group enriched             | Detected in some       | skeletal muscle,testis           |
| 573 | <a href="#">NX_Q6B811</a> | ENSG00000079393      | Dual specificity protein phos | DUSP13        | 10q22.2    |       |          |            | yes          |                |                |         | yes     | yes          |             | N/A                                  | Tissue enhanced            | Detected in some       | skeletal muscle,testis,tongue    |
| 574 | <a href="#">NX_Q75364</a> | ENSG00000107859      | Pituitary homeobox 3          | PITX3         | 10q24.32   |       | yes      |            |              |                |                |         |         |              |             | N/A                                  | Tissue enhanced            | Detected in some       | skeletal muscle,tongue           |
| 575 | <a href="#">NX_P13349</a> | ENSG00000111049      | Myogenic factor 5             | MYF5          | 12q21.31   |       | yes      |            |              | yes            |                |         | yes     | yes          |             | N/A                                  | Group enriched             | Detected in some       | skeletal muscle,tongue           |
| 576 | <a href="#">NX_P10767</a> | ENSG00000111241      | Fibroblast growth factor 6    | FGF6          | 12p13.32   |       |          |            |              | yes            |                |         | yes     |              |             | N/A                                  | Group enriched             | Detected in some       | skeletal muscle,tongue           |
| 577 | <a href="#">NX_Q86YV6</a> | ENSG00000145949      | Myosin light chain kinase fa  | MYLK4         | 6p25.2     |       |          | yes        |              |                |                |         |         |              |             | Uncertain                            | Group enriched             | Detected in some       | skeletal muscle,tongue           |
| 578 | <a href="#">NX_Q96NS5</a> | ENSG00000161664      | Ankyrin repeat and SOCS b     | ASB16         | 17q21.31   |       |          |            |              |                | yes            |         |         |              |             | Approved                             | Tissue enhanced            | Detected in many       | skeletal muscle,tongue           |
| 579 | <a href="#">NX_Q13702</a> | ENSG00000165917      | 43 kDa receptor-associated    | RAPSN         | 11p11.2    |       |          |            |              |                |                |         |         |              |             |                                      |                            |                        |                                  |

ST3\_Human Protein Atlas IHC and mRNA Data Added to neXtProt Data (ST2) for 950 Non-MS-Based neXtProt PE1 Proteins  
(ordered alphabetically by tissue with highest expression, Column S)

| 1   | A                         | B                 | C                              | D            | E          | F     | G        | H          | I            | J              | K              | L       | M       | N            | O           | P                                    | Q                              | R                            | S                                  |
|-----|---------------------------|-------------------|--------------------------------|--------------|------------|-------|----------|------------|--------------|----------------|----------------|---------|---------|--------------|-------------|--------------------------------------|--------------------------------|------------------------------|------------------------------------|
|     | accession code            | Ensembl gene code | protein name                   | gene name(s) | chromosome | Edman | textbook | Disease mu | 3D structure | SP curated PPI | IntAct PPI GOL | Exp PTM | Ab info | Exp function | mutagenesis | Tissue Atlas reliability score HPA19 | Consensus RNA Specificity      | Consensus Distribution       | Tissue(s) Most Enriched/Enhanced   |
| 597 | <a href="#">NX_Q5TA81</a> | ENSG00000187180   | Late cornified envelope prot   | LCE2C        | 1q21.3     |       |          |            |              |                |                |         |         | yes          |             | N/A                                  | Tissue enriched                | Detected in some             | skin 1                             |
| 598 | <a href="#">NX_P60410</a> | ENSG00000187766   | Keratin-associated protein 1   | KRTAP10-8    | 21q22.3    |       |          |            |              | yes            |                |         |         | yes          |             | N/A                                  | Tissue enriched                | Detected in single           | skin 1                             |
| 599 | <a href="#">NX_Q6UVW9</a> | ENSG00000188393   | C-type lectin domain family    | CLEC2A       | 12p13.31   |       |          |            | yes          | yes            |                |         |         |              |             | Approved                             | Tissue enriched                | Detected in some             | skin 1                             |
| 600 | <a href="#">NX_Q07627</a> | ENSG00000188581   | Keratin-associated protein 1   | KRTAP1-1     | 17q21.2    |       |          |            |              |                |                |         |         | yes          |             | N/A                                  | Tissue enriched                | Detected in some             | skin 1                             |
| 601 | <a href="#">NX_Q6LXB1</a> | ENSG00000188624   | Insulin growth factor-like fan | IGFL3        | 19q13.32   | yes   |          |            |              |                |                |         |         | yes          |             | Uncertain                            | Tissue enriched                | Detected in some             | skin 1                             |
| 602 | <a href="#">NX_Q6L8H2</a> | ENSG00000196224   | Keratin-associated protein 5   | KRTAP5-3     | 11p15.5    |       |          |            |              | yes            |                |         |         | yes          |             | N/A                                  | Tissue enriched                | Detected in some             | skin 1                             |
| 603 | <a href="#">NX_Q517P3</a> | ENSG00000196734   | Late cornified envelope prot   | LCE1B        | 1q21.3     |       |          |            |              |                |                |         |         | yes          |             | N/A                                  | Tissue enriched                | Detected in some             | skin 1                             |
| 604 | <a href="#">NX_Q6L8G4</a> | ENSG00000204571   | Keratin-associated protein 5   | KRTAP5-11    | 11q13.4    |       |          |            |              | yes            |                |         |         | yes          |             | N/A                                  | Tissue enriched                | Detected in some             | skin 1                             |
| 605 | <a href="#">NX_P0C7H8</a> | ENSG00000212724   | Keratin-associated protein 2   | KRTAP2-3     | 17q21.2    |       |          |            |              |                |                |         |         | yes          |             | Supported                            | Tissue enriched                | Detected in some             | skin 1                             |
| 606 | <a href="#">NX_Q9BQ66</a> | ENSG00000213416   | Keratin-associated protein 4   | KRTAP4-12    | 17q21.2    |       |          |            |              | yes            |                |         |         | yes          |             | N/A                                  | Tissue enriched                | Detected in some             | skin 1                             |
| 607 | <a href="#">NX_Q9BYR9</a> | ENSG00000213417   | Keratin-associated protein 2   | KRTAP2-4     | 17q21.2    |       |          |            |              |                |                |         |         | yes          |             | Supported                            | Tissue enriched                | Detected in single           | skin 1                             |
| 608 | <a href="#">NX_P60372</a> | ENSG00000215454   | Keratin-associated protein 1   | KRTAP10-4    | 21q22.3    |       |          |            |              | yes            |                |         |         | yes          |             | N/A                                  | Tissue enriched                | Detected in some             | skin 1                             |
| 609 | <a href="#">NX_P60411</a> | ENSG00000221837   | Keratin-associated protein 1   | KRTAP10-9    | 21q22.3    |       |          |            |              | yes            |                |         |         | yes          |             | N/A                                  | Tissue enriched                | Detected in single           | skin 1                             |
| 610 | <a href="#">NX_P34130</a> | ENSG00000225950   | Neurotrophin-4                 | NTF4         | 19q13.33   |       |          |            | yes          |                |                |         |         | yes          |             | N/A                                  | Tissue enhanced                | Detected in many             | skin 1                             |
| 611 | <a href="#">NX_B2RXH2</a> | ENSG00000235268   | Lysine-specific demethylase    | KDM4E        | 11q21      |       |          |            | yes          |                |                |         |         | yes          |             | Uncertain                            | Tissue enhanced                | Detected in some             | skin 1                             |
| 612 | <a href="#">NX_P60370</a> | ENSG00000241123   | Keratin-associated protein 1   | KRTAP10-5    | 21q22.3    |       |          |            |              | yes            |                |         |         | yes          |             | N/A                                  | Tissue enriched                | Detected in single           | skin 1                             |
| 613 | <a href="#">NX_Q3SYF9</a> | ENSG00000244362   | Keratin-associated protein 1   | KRTAP19-7    | 21q22.11   |       |          |            |              |                |                |         |         | yes          |             | N/A                                  | Tissue enriched                | Detected in single           | skin 1                             |
| 614 | <a href="#">NX_Q3SYF9</a> | ENSG00000284635   | Small cysteine and glycine r   | SCYGR8       | 2q36.3     |       |          |            |              |                |                |         |         |              |             | N/A                                  | Tissue enriched                | Detected in single           | skin 1                             |
| 615 | <a href="#">NX_Q14627</a> | ENSG00000131264   | Homeobox protein CDX-4         | CDX4         | Xq13.2     |       |          |            |              |                |                |         |         |              |             | Uncertain                            | Group enriched                 | Detected in some             | skin 1, testis                     |
| 616 | <a href="#">NX_Q9BZG2</a> | ENSG00000142513   | Testicular acid phosphatase    | ACP4         | 19q13.33   |       |          | yes        |              |                |                |         |         | yes          |             | N/A                                  | Tissue enhanced                | Detected in some             | skin 1, testis                     |
| 617 | <a href="#">NX_P60329</a> | ENSG00000212933   | Keratin-associated protein 1   | KRTAP12-4    | 21q22.3    |       |          |            |              | yes            |                |         |         | yes          |             | N/A                                  | Group enriched                 | Detected in some             | skin 1, testis                     |
| 618 | <a href="#">NX_Q96RP3</a> | ENSG00000145040   | Urocortin-2                    | UCN2         | 3p21.31    |       |          |            | yes          | yes            |                |         |         | yes          |             | Uncertain                            | Tissue enhanced                | Detected in some             | skin 1, vagina                     |
| 619 | <a href="#">NX_Q96LB1</a> | ENSG00000183695   | Mas-related G-protein coupl    | MRGPRX2      | 11p15.1    |       |          |            |              |                |                |         | yes     | yes          |             | Approved                             | Tissue enhanced                | Detected in many             | smooth muscle                      |
| 620 | <a href="#">NX_Q86UV6</a> | ENSG00000155428   | Tripartite motif-containing pr | TRIM74       | 7q11.23    |       |          |            |              |                |                |         |         | yes          |             | N/A                                  | Tissue enhanced                | Detected in many             | stomach 1                          |
| 621 | <a href="#">NX_A6NEM1</a> | ENSG00000197978   | Golgin subfamily A member      | GOLGA6L9     | 15q25.2    |       |          |            |              |                |                |         |         | yes          |             | N/A                                  | Tissue enhanced                | Detected in some             | stomach 1                          |
| 622 | <a href="#">NX_P0DJJ7</a> | ENSG00000229183   | Pepsin A-4                     | PGA4         | 11q12.2    | yes   |          |            | yes          |                |                |         |         | yes          |             | Supported                            | Tissue enriched                | Detected in some             | stomach 1                          |
| 623 | <a href="#">NX_P0DJJ8</a> | ENSG00000229859   | Pepsin A-3                     | PGA3         | 11q12.2    | yes   |          |            |              |                |                |         |         | yes          |             | Enhanced                             | Tissue enriched                | Detected in some             | stomach 1                          |
| 624 | <a href="#">NX_Q9NR90</a> | ENSG00000187191   | Deleted in azoospermia prof    | DAZ3         | Yq11.23    |       |          |            | yes          |                |                |         |         | yes          |             | Approved                             | Tissue enhanced                | Detected in some             | stomach 1, testis                  |
| 625 | <a href="#">NX_Q9NQZ3</a> | ENSG00000188120   | Deleted in azoospermia prof    | DAZ1         | Yq11.223   |       |          |            | yes          | yes            |                |         | yes     | yes          |             | Supported                            | Group enriched                 | Detected in some             | stomach 1, testis                  |
| 626 | <a href="#">NX_Q86SG3</a> | ENSG00000205916   | Deleted in azoospermia prof    | DAZ4         | Yq11.23    |       |          |            | yes          |                |                |         | yes     | yes          |             | Approved                             | Group enriched                 | Detected in some             | stomach 1, testis                  |
| 627 | <a href="#">NX_Q13117</a> | ENSG00000205944   | Deleted in azoospermia prof    | DAZ2         | Yq11.223   |       |          |            | yes          |                |                |         |         | yes          |             | Approved                             | Group enriched                 | Detected in some             | stomach 1, testis                  |
| 628 | <a href="#">NX_Q5QJU3</a> | ENSG00000177076   | Alkaline ceramidase 2          | ACER2        | 9p22.1     |       |          | yes        |              |                |                |         | yes     | yes          |             | N/A                                  | Tissue enhanced                | Detected in many             | stomach 1, urinary bladder, vagina |
| 629 | <a href="#">NX_Q9NR20</a> | ENSG00000102199   | Dual specificity tyrosine-pho  | DYRK4        | 12p13.32   |       |          |            |              | yes            |                | yes     |         | yes          |             | Enhanced                             | Tissue enriched                | Detected in all              | testis                             |
| 630 | <a href="#">NX_Q15457</a> | ENSG00000057468   | MutS protein homolog 4         | MSH4         | 1p31.1     |       |          |            | yes          | yes            |                |         |         | yes          |             | N/A                                  | Tissue enriched                | Detected in some             | testis                             |
| 631 | <a href="#">NX_Q9H0A6</a> | ENSG00000105982   | RING finger protein 32         | RNF32        | 7q36.3     |       |          |            |              | yes            |                |         |         | yes          |             | Enhanced                             | Tissue enriched                | Detected in many             | testis                             |
| 632 | <a href="#">NX_P09430</a> | ENSG00000118245   | Spermatid nuclear transition   | TNP1         | 2q35       |       |          |            |              |                |                | yes     |         |              |             | Enhanced                             | Tissue enriched                | Detected in some             | testis                             |
| 633 | <a href="#">NX_P48165</a> | ENSG00000121634   | Gap junction alpha-8 protei    | GJA8         | 1q21.2     |       |          | yes        |              |                |                |         |         | yes          |             | Enhanced                             | Tissue enriched                | Detected in single           | testis                             |
| 634 | <a href="#">NX_Q8LZX4</a> | ENSG00000122728   | Transcription initiation fact  | TAF1L        | 9p21.1     |       |          |            | yes          | yes            |                |         |         | yes          |             | Uncertain                            | Tissue enriched                | Detected in some             | testis                             |
| 635 | <a href="#">NX_Q6NSX1</a> | ENSG00000123171   | Coiled-coil domain-containi    | CCDC70       | 13q14.3    |       |          |            |              | yes            |                |         |         |              |             | N/A                                  | Tissue enriched                | Detected in single           | testis                             |
| 636 | <a href="#">NX_Q722G1</a> | ENSG00000123569   | Histone H2B type W-T           | H2BFWT       | Xq22.2     |       |          |            | yes          |                |                | yes     | yes     |              |             | Uncertain                            | Tissue enhanced                | Detected in single           | testis                             |
| 637 | <a href="#">NX_Q8N693</a> | ENSG00000123576   | Homeobox protein ESX1          | ESX1         | Xq22.2     |       |          |            |              |                |                | yes     | yes     |              |             | Enhanced                             | Tissue enriched                | Detected in single           | testis                             |
| 638 | <a href="#">NX_Q6LJ36</a> | ENSG00000124818   | Opsin-5                        | OPN5         | 6p12.3     |       |          |            |              |                |                | yes     |         |              |             | Supported                            | Tissue enriched                | Detected in single           | testis                             |
| 639 | <a href="#">NX_Q9NQW5</a> | ENSG00000126856   | Probable histone-lysine N-m    | PRDM7        | 16q24.3    |       |          |            |              |                |                |         |         | yes          |             | Approved                             | Tissue enriched                | Detected in single           | testis                             |
| 640 | <a href="#">NX_Q75679</a> | ENSG00000128276   | Ret finger protein-like 3      | RFPL3        | 22q12.3    |       |          |            |              |                |                |         | yes     |              |             | N/A                                  | Tissue enriched                | Detected in some             | testis                             |
| 641 | <a href="#">NX_Q9BZE7</a> | ENSG00000128346   | UPF0193 protein EVG1           | C22orf23     | 22q13.1    |       |          |            |              |                |                |         |         | yes          |             | N/A                                  | Tissue enriched                | Detected in many             | testis                             |
| 642 | <a href="#">NX_Q6XPS3</a> | ENSG00000132958   | Phosphatidylinositol 3,4,5-tr  | PTPE2        | 13q12.11   |       |          |            |              |                |                |         | yes     | yes          |             | N/A                                  | Tissue enriched                | Detected in some             | testis                             |
| 643 | <a href="#">NX_Q9BXU7</a> | ENSG00000134588   | Ubiquitin carboxyl-terminal    | USP26        | Xq26.2     |       |          |            | yes          |                |                |         | yes     | yes          |             | N/A                                  | Tissue enriched                | Detected in single           | testis                             |
| 644 | <a href="#">NX_Q9BVB6</a> | ENSG00000139656   | Small integral membrane pr     | SMIM2        | 13q14.11   |       |          |            |              |                |                |         | yes     |              |             | Enhanced                             | Tissue enriched                | Detected in some             | testis                             |
| 645 | <a href="#">NX_Q96SE0</a> | ENSG00000143994   | Protein ABHD1                  | ABHD1        | 2p23.3     |       |          |            |              |                |                |         |         |              |             | Uncertain                            | Tissue enriched                | Detected in some             | testis                             |
| 646 | <a href="#">NX_Q9BR10</a> | ENSG00000149634   | Spermatogenesis-associate      | SPATA25      | 20q13.12   |       |          |            |              |                |                |         | yes     | yes          |             | N/A                                  | Tissue enhanced                | Detected in many             | testis                             |
| 647 | <a href="#">NX_Q8TAL5</a> | ENSG00000157653   | Uncharacterized protein C9     | C9orf43      | 9q32       |       |          |            |              |                |                |         | yes     |              |             | N/A                                  | Tissue enriched                | Detected in many             | testis                             |
| 648 | <a href="#">NX_Q6YFQ2</a> | ENSG00000160471   | Cytochrome c oxidase subu      | COX6B2       | 19q13.42   |       |          |            |              |                |                |         |         |              |             | N/A                                  | Tissue enriched                | Detected in some             | testis                             |
| 649 | <a href="#">NX_Q8NEG5</a> | ENSG00000163012   | E3 ubiquitin-protein ligase    | ZSWIM2       | 2q32.1     |       |          |            | yes          |                |                |         |         |              |             | N/A                                  | Tissue enriched                | Detected in some             | testis                             |
| 650 | <a href="#">NX_Q5MJ70</a> | ENSG00000163806   | Speedy protein A               | SPDYA        | 2p23.2     |       |          |            | yes          | yes            |                |         |         | yes          |             | Enhanced                             | Tissue enriched                | Detected in some             | testis                             |
| 651 | <a href="#">NX_Q9BXC8</a> | ENSG00000164299   | Spermatogenic leucine zipp     | SPZ1         | 5q14.1     |       |          |            |              |                |                |         |         | yes          |             | N/A                                  | Tissue enriched                | Detected in single           | testis                             |
| 652 | <a href="#">NX_Q8NA57</a> | ENSG00000165805   | Uncharacterized protein C11    | C12orf50     | 12q21.32   |       |          |            |              |                |                |         |         | yes          |             | N/A                                  | Tissue enriched                | Detected in single           | testis                             |
| 653 | <a href="#">NX_Q96BM0</a> | ENSG00000165948   | Interferon alpha-inducible pr  | IFI2L7L1     | 14q32.12   |       |          |            | yes          |                |                |         |         | yes          |             | N/A                                  | Tissue enhanced                | Detected in all              | testis                             |
| 654 | <a href="#">NX_Q9NYW7</a> | ENSG00000169777   | Taste receptor type 2 mem      | TAS2R1       | 5p15.31    |       |          |            |              |                |                |         |         | yes          |             | Uncertain                            | Tissue enriched                | Detected in single           | testis                             |
| 655 | <a href="#">NX_Q15415</a> | ENSG00000169800   | RNA-binding motif protein,     | RBMY1F, RBMY | Yq11.223   |       |          |            | yes          | yes            |                |         | yes     |              |             | Supported                            | Tissue enriched                | Detected in single, Detected | testis                             |
| 656 | <a href="#">NX_Q9BXU2</a> | ENSG00000170925   | Testis-expressed protein 13    | TEX13B       | Xq22.3     |       |          |            |              |                |                |         |         |              |             | N/A                                  | Tissue enriched                | Detected in single           | testis                             |
| 657 | <a href="#">NX_Q9JBD0</a> | ENSG00000171116   | Heat shock transcription fac   | HSFX1, HSFX2 | Xq28       |       |          |            |              |                |                |         | yes     | yes          |             | Approved, Supported                  | Low tissue specificity, Tissue | Detected in many, Detected   | testis                             |
| 658 | <a href="#">NX_Q5T0L3</a> | ENSG00000171722   | Spermatogenesis-associate      | SPATA46      | 1q23.3     |       |          |            |              |                |                |         |         |              |             | N/A                                  | Tissue enriched                | Detected in some             | testis                             |
| 659 | <a href="#">NX_Q9Y6F8</a> | ENSG00000172288   | Testis-specific chromodom      | CDY1, CDY1B  | Yq11.23    |       |          |            | yes          | yes            |                |         | yes     | yes          |             | Supported                            | Tissue enriched                | Detected in single           | testis                             |
| 660 | <a href="#">NX_P59095</a> | ENSG00000174448   | StAR-related lipid transfer p  | STARDB6      | 18q21.2    |       |          |            | yes          |                |                |         |         |              |             | N/A                                  | Tissue enriched                | Detected in some             | testis                             |
| 661 | <a href="#">NX_P04553</a> | ENSG00000175646   | Sperm protamine P1             | PRM1         | 16p13.13   | yes   |          |            | yes          | yes            |                |         |         | yes          |             | Enhanced                             | Tissue enriched                | Detected in some             | testis                             |
| 662 | <a href="#">NX_Q8N7E2</a> | ENSG00000175809   | E3 ubiquitin-protein ligase    | CBLL2        | Xp22.11    |       |          |            |              |                |                |         |         | yes          |             | N/A                                  | Tissue enriched                | Detected in single           | testis                             |
| 663 | <a href="#">NX_Q6PIV2</a> | ENSG00000176302   | Forkhead box protein R1        | FOXR1        | 11q23.3    |       |          |            |              |                |                |         | yes     |              |             | N/A                                  | Tissue enriched                | Detected in single           | testis                             |
| 664 | <a href="#">NX_Q8LUE0</a> | ENSG00000176679   | Homeobox protein TGIF2LY       | TGIF2LY      | Yp11.2     |       |          |            |              |                |                |         |         | yes          |             | N/A                                  | Tissue enriched                | Detected in single           | testis                             |

ST3\_Human Protein Atlas IHC and mRNA Data Added to neXtProt Data (ST2) for 950 Non-MS-Based neXtProt PE1 Proteins  
 (ordered alphabetically by tissue with highest expression, Column S)

| 1   | A                          | B                                | C                                                        | D                | E          | F     | G        | H          | I            | J              | K              | L       | M       | N            | O           | P                                    | Q                         | R                      | S                                |
|-----|----------------------------|----------------------------------|----------------------------------------------------------|------------------|------------|-------|----------|------------|--------------|----------------|----------------|---------|---------|--------------|-------------|--------------------------------------|---------------------------|------------------------|----------------------------------|
|     | accession code             | Ensembl gene code                | protein name                                             | gene name(s)     | chromosome | Edman | textbook | Disease mu | 3D structure | SP curated PPI | IntAct PPI GOL | Exp PTM | Ab info | Exp function | mutagenesis | Tissue Atlas reliability score HPA19 | Consensus RNA Specificity | Consensus Distribution | Tissue(s) Most Enriched/Enhanced |
| 682 | <a href="#">NX_Q4JL3</a>   | ENSG00000204179                  | Tyrosine-protein phosphatase PTPN20                      | PTPN20           | 10q11.22   |       |          |            |              |                |                |         | yes     | yes          |             | Enhanced                             | Tissue enriched           | Detected in many       | testis                           |
| 683 | <a href="#">NX_Q6A555</a>  | ENSG00000204193                  | Thioredoxin domain-containing protein TXNDC8             | TXNDC8           | 9q31.3     |       |          |            |              |                |                |         | yes     | yes          |             | N/A                                  | Tissue enriched           | Detected in some       | testis                           |
| 684 | <a href="#">NX_Q5JUK9</a>  | ENSG00000204279                  | P antigen family member 3 PAGE3                          | PAGE3            | Xp11.21    |       |          |            |              | yes            |                |         |         |              |             | Uncertain                            | Tissue enriched           | Detected in single     | testis                           |
| 685 | <a href="#">NX_Q76001</a>  | ENSG00000204701                  | Olfactory receptor 2J3 OR2J3                             | OR2J3            | 6p22.1     |       |          |            |              |                |                |         |         | yes          | yes         | N/A                                  | Tissue enriched           | Detected in some       | testis                           |
| 686 | <a href="#">NX_Q6NXP2</a>  | ENSG00000205085                  | Protein FAM71F2 FAM71F2                                  | FAM71F2          | 7q32.1     |       |          |            |              | yes            |                |         |         |              |             | Enhanced                             | Tissue enriched           | Detected in many       | testis                           |
| 687 | <a href="#">NX_Q495Y8</a>  | ENSG00000205238                  | Speedy protein E2 SPDYE2                                 | SPDYE2           | 7q22.1     |       |          |            |              | yes            |                |         |         |              |             | Approved                             | Tissue enriched           | Detected in many       | testis                           |
| 688 | <a href="#">NX_Q85F48</a>  | ENSG00000206127                  | Golgin subfamily A member 8 GOLGA80                      | GOLGA80          | 15q13.3    |       |          |            |              |                |                |         |         |              |             | N/A                                  | Tissue enriched           | Detected in many       | testis                           |
| 689 | <a href="#">NX_Q81YF1</a>  | ENSG00000206181                  | Elongin-A2 ELOA2                                         | ELOA2            | 18q21.1    |       |          |            | yes          | yes            |                |         |         | yes          |             | Approved                             | Tissue enriched           | Detected in single     | testis                           |
| 690 | <a href="#">NX_Q6NNM8</a>  | ENSG00000213471                  | Tubulin polyglutamylase TTT1                             | TTL13P           | 15q26.1    |       |          |            |              |                |                |         |         |              | yes         | Enhanced                             | Tissue enriched           | Detected in single     | testis                           |
| 691 | <a href="#">NX_Q09MP3</a>  | ENSG00000214842                  | RAD51-associated protein 2 RAD51AP2                      | RAD51AP2         | 2p24.2     |       |          |            | yes          |                |                |         |         |              |             | N/A                                  | Tissue enriched           | Detected in some       | testis                           |
| 692 | <a href="#">NX_Q1L429</a>  | ENSG00000216649, ENSG00000222047 | G antigen 12B/C/D/E GAGE12B, GAGE12C                     | GAGE12B, GAGE12C | Xp11.23    |       |          |            |              | yes            |                |         |         |              |             | Supported                            | Tissue enriched           | Detected in single     | testis                           |
| 693 | <a href="#">NX_Q5SWW7</a>  | ENSG00000222047                  | Uncharacterized protein C11orf55                         | C11orf55         | 10q22.2    |       |          |            |              | yes            |                |         |         |              |             | Approved                             | Tissue enriched           | Detected in some       | testis                           |
| 694 | <a href="#">NX_P86480</a>  | ENSG00000227151                  | Proline-rich protein 20D PRR20D                          | PRR20D           | 13q21.1    |       |          |            |              | yes            |                |         |         |              |             | Uncertain                            | Tissue enriched           | Detected in single     | testis                           |
| 695 | <a href="#">NX_P0CV98</a>  | ENSG00000228927                  | Testis-specific Y-encoded protein TSPY3                  | TSPY3            | Yp11.2     |       |          |            |              | yes            |                |         |         |              |             | Supported                            | Tissue enriched           | Detected in some       | testis                           |
| 696 | <a href="#">NX_P86479</a>  | ENSG00000229665                  | Proline-rich protein 20C PRR20C                          | PRR20C           | 13q21.1    |       |          |            |              | yes            |                |         |         |              |             | Uncertain                            | Tissue enriched           | Detected in single     | testis                           |
| 697 | <a href="#">NX_P86478</a>  | ENSG00000234278                  | Proline-rich protein 20E PRR20E                          | PRR20E           | 13q21.1    |       |          |            |              | yes            |                |         |         |              |             | Uncertain                            | Tissue enriched           | Detected in single     | testis                           |
| 698 | <a href="#">NX_P0DJ3</a>   | ENSG00000234414                  | RNA-binding motif protein, Y RBMY1A1                     | RBMY1A1          | Yq11.223   |       |          | yes        | yes          | yes            |                |         | yes     | yes          |             | Supported                            | Tissue enriched           | Detected in single     | testis                           |
| 699 | <a href="#">NX_Q9UNN4</a>  | ENSG00000242441                  | TFIIA-alpha and beta-like factor 1 TFIIA1                | GTF2A1L          | 2p16.3     |       |          |            |              | yes            |                |         | yes     | yes          |             | N/A                                  | Tissue enriched           | Detected in some       | testis                           |
| 700 | <a href="#">NX_Q09M13</a>  | ENSG00000243978                  | Retrosposon Gag-like protein 1 RGL1                      | RGL1             | Xq23       |       |          |            |              |                |                |         |         |              |             | Enhanced                             | Tissue enriched           | Detected in some       | testis                           |
| 701 | <a href="#">NX_Q6DHY5</a>  | ENSG00000260287                  | TBC1 domain family member 1 TBC1D3G                      | TBC1D3G          | 17q12      |       |          |            |              | yes            |                |         |         |              |             | Supported                            | Tissue enriched           | Detected in single     | testis                           |
| 702 | <a href="#">NX_Q9JUBX2</a> | ENSG00000260596                  | Double homeobox protein 4 DUX4                           | DUX4             | 4q35.2     |       |          | yes        | yes          | yes            |                |         | yes     | yes          | yes         | N/A                                  | Tissue enriched           | Detected in some       | testis                           |
| 703 | <a href="#">NX_Q60224</a>  | ENSG00000268009, ENSG00000268988 | Protein SSX4 SSX4, SSX4B                                 | SSX4, SSX4B      | Xp11.23    |       |          |            |              | yes            |                |         |         | yes          |             | Approved                             | Tissue enriched           | Detected in single     | testis                           |
| 704 | <a href="#">NX_Q76001</a>  | ENSG00000268988                  | Sperm protein associated with spermatogenesis SPANXN2    | SPANXN2          | Xq27.3     |       |          |            |              |                |                |         |         |              |             | N/A                                  | Tissue enriched           | Detected in single     | testis                           |
| 705 | <a href="#">NX_Q8NHU0</a>  | ENSG00000269096                  | Cancer/testis antigen family 1 CT45A3                    | CT45A3           | Xq26.3     |       |          |            |              | yes            |                |         |         |              |             | Supported                            | Tissue enriched           | Detected in some       | testis                           |
| 706 | <a href="#">NX_P0C5Y9</a>  | ENSG00000274183                  | Histone H2A-Bbd type 1 H2AFB1                            | H2AFB1           | Xq28       |       |          |            | yes          |                |                |         | yes     |              |             | N/A                                  | Tissue enriched           | Detected in some       | testis                           |
| 707 | <a href="#">NX_Q9Y458</a>  | ENSG00000122145                  | T-box transcription factor 18 TBX22                      | TBX22            | Xq21.1     |       | yes      |            |              | yes            |                |         | yes     |              |             | N/A                                  | Group enriched            | Detected in some       | testis, thyroid gland            |
| 708 | <a href="#">NX_Q5DT21</a>  | ENSG00000204909                  | Serine protease inhibitor Kallistatin SPINK9             | SPINK9           | 5q32       |       |          |            | yes          |                | yes            |         | yes     | yes          |             | Uncertain                            | Tissue enriched           | Detected in many       | tongue                           |
| 709 | <a href="#">NX_Q0P5P2</a>  | ENSG00000214226                  | Uncharacterized protein C11orf67                         | C11orf67         | 17q22      |       |          |            |              | yes            |                |         |         |              |             | Uncertain                            | Tissue enriched           | Detected in many       | vagina                           |
| 710 | <a href="#">NX_Q9NQW1</a>  | ENSG00000075826                  | Protein transport protein Sec13L1                        | SEC31B           | 10q24.31   |       |          |            | yes          |                | yes            | yes     | yes     | yes          |             | Uncertain                            | Low tissue specificity    | Detected in many       |                                  |
| 711 | <a href="#">NX_Q9P0N8</a>  | ENSG00000099785                  | E3 ubiquitin-protein ligase MARCH2                       | MARCH2           | 19p13.2    |       |          |            | yes          | yes            | yes            |         | yes     |              |             | Approved                             | Low tissue specificity    | Detected in all        |                                  |
| 712 | <a href="#">NX_Q15105</a>  | ENSG00000101665                  | Mothers against decapentaplegic 1 SMAD7                  | SMAD7            | 18q21.1    |       |          | yes        | yes          | yes            | yes            | yes     | yes     | yes          |             | Approved                             | Low tissue specificity    | Detected in all        |                                  |
| 713 | <a href="#">NX_Q95859</a>  | ENSG00000106025                  | Tetraspanin-12 TSPAN12                                   | TSPAN12          | 7q31.31    |       |          | yes        | yes          | yes            | yes            | yes     | yes     | yes          |             | Uncertain                            | Low tissue specificity    | Detected in many       |                                  |
| 714 | <a href="#">NX_Q01453</a>  | ENSG00000109099                  | Peripheral myelin protein 22 PMP22                       | PMP22            | 17p12      |       | yes      |            |              | yes            |                |         | yes     |              |             | N/A                                  | Low tissue specificity    | Detected in all        |                                  |
| 715 | <a href="#">NX_Q96A72</a>  | ENSG00000111196                  | Protein mago nashi homolog 1 MAGOH1                      | MAGOH1           | 12p13.2    |       |          | yes        | yes          | yes            | yes            | yes     | yes     |              |             | Uncertain                            | Low tissue specificity    | Detected in all        |                                  |
| 716 | <a href="#">NX_Q9NR21</a>  | ENSG00000111224                  | Protein mono-ADP-ribosyltransferase PARP11               | PARP11           | 12p13.32   |       |          | yes        | yes          | yes            | yes            | yes     | yes     | yes          |             | Uncertain                            | Low tissue specificity    | Detected in all        |                                  |
| 717 | <a href="#">NX_Q9NYW0</a>  | ENSG00000121318                  | Taste receptor type 2 member 1 TAS2R10                   | TAS2R10          | 12p13.2    |       |          |            |              |                |                |         | yes     |              |             | N/A                                  | Low tissue specificity    | Detected in some       |                                  |
| 718 | <a href="#">NX_Q9NYW3</a>  | ENSG00000121377                  | Taste receptor type 2 member 1 TAS2R7                    | TAS2R7           | 12p13.2    |       |          |            |              |                |                |         | yes     |              |             | N/A                                  | Not detected              | Not detected           |                                  |
| 719 | <a href="#">NX_P43088</a>  | ENSG00000122420                  | Prostaglandin F2-alpha receptor 1 PTGFR                  | PTGFR            | 1p31.1     |       |          |            | yes          |                |                |         | yes     |              |             | N/A                                  | Low tissue specificity    | Detected in many       |                                  |
| 720 | <a href="#">NX_Q9Y2N7</a>  | ENSG00000124440                  | Hypoxia-inducible factor 3-alpha HIF3A                   | HIF3A            | 19q13.32   |       |          | yes        | yes          | yes            |                | yes     | yes     | yes          |             | Approved                             | Low tissue specificity    | Detected in all        |                                  |
| 721 | <a href="#">NX_Q8WV35</a>  | ENSG00000125122                  | Leucine-rich repeat-containing protein 1 LRRRC29         | LRRRC29          | 16q22.1    |       |          |            |              | yes            |                |         | yes     |              |             | Uncertain                            | Low tissue specificity    | Detected in many       |                                  |
| 722 | <a href="#">NX_Q9NYV7</a>  | ENSG00000128519                  | Taste receptor type 2 member 1 TAS2R16                   | TAS2R16          | 7q31.32    |       |          |            | yes          |                |                |         | yes     |              |             | N/A                                  | Not detected              | Not detected           |                                  |
| 723 | <a href="#">NX_Q71317</a>  | ENSG00000133678                  | Transmembrane protein 254 TMEM254                        | TMEM254          | 10q22.3    |       |          |            |              |                |                |         |         |              |             | Approved                             | Low tissue specificity    | Detected in all        |                                  |
| 724 | <a href="#">NX_Q14626</a>  | ENSG00000137070                  | Interleukin-11 receptor subunit 1 IL11RA                 | IL11RA           | 9p13.3     |       | yes      |            | yes          |                |                |         | yes     | yes          |             | Supported                            | Low tissue specificity    | Detected in all        |                                  |
| 725 | <a href="#">NX_Q6NDV4</a>  | ENSG00000137103                  | Transmembrane protein 8B TMEM8B                          | TMEM8B           | 9p13.3     |       |          |            | yes          |                |                | yes     | yes     | yes          |             | Approved                             | Low tissue specificity    | Detected in all        |                                  |
| 726 | <a href="#">NX_Q2NL67</a>  | ENSG00000137817                  | Protein mono-ADP-ribosyltransferase PARP6                | PARP6            | 15q23      |       |          |            |              |                |                | yes     | yes     |              |             | Approved                             | Low tissue specificity    | Detected in all        |                                  |
| 727 | <a href="#">NX_Q9GZQ8</a>  | ENSG00000140941                  | Microtubule-associated protein 1A MAP1LC3B               | MAP1LC3B         | 16q24.2    |       |          | yes        | yes          | yes            | yes            | yes     | yes     | yes          |             | Uncertain                            | Low tissue specificity    | Detected in all        |                                  |
| 728 | <a href="#">NX_Q9H324</a>  | ENSG00000142303                  | A disintegrin and metalloprotease 10 ADAMTS10            | ADAMTS10         | 19p13.2    |       | yes      |            | yes          | yes            |                |         | yes     | yes          |             | Uncertain                            | Low tissue specificity    | Detected in all        |                                  |
| 729 | <a href="#">NX_Q969D9</a>  | ENSG00000145777                  | Thymic stromal lymphopoietin TSLP                        | TSLP             | 5q22.1     |       |          | yes        |              |                |                |         | yes     |              |             | N/A                                  | Low tissue specificity    | Detected in many       |                                  |
| 730 | <a href="#">NX_Q9BQJ4</a>  | ENSG00000147027                  | Transmembrane protein 47 TMEM47                          | TMEM47           | Xp21.1     |       |          |            |              |                | yes            |         |         |              |             | Approved                             | Low tissue specificity    | Detected in many       |                                  |
| 731 | <a href="#">NX_Q99865</a>  | ENSG00000147059                  | Spindlin-2A SPIN2A                                       | SPIN2A           | Xp11.21    |       |          |            | yes          |                |                |         |         | yes          |             | Uncertain                            | Low tissue specificity    | Detected in many       |                                  |
| 732 | <a href="#">NX_A2RU14</a>  | ENSG00000150433                  | Transmembrane protein 218 TMEM218                        | TMEM218          | 11q24.2    |       |          |            |              | yes            |                |         |         |              |             | Uncertain                            | Low tissue specificity    | Detected in all        |                                  |
| 733 | <a href="#">NX_P0CG48</a>  | ENSG00000150991                  | Polyubiquitin-C UBC                                      | UBC              | 12q24.31   |       |          | yes        |              | yes            | yes            |         | yes     | yes          |             | Supported                            | Low tissue specificity    | Detected in all        |                                  |
| 734 | <a href="#">NX_Q95231</a>  | ENSG00000151650                  | Homeobox protein VENTX VENTX                             | VENTX            | 10q26.3    |       |          |            |              | yes            |                |         | yes     |              |             | Uncertain                            | Low tissue specificity    | Detected in many       |                                  |
| 735 | <a href="#">NX_Q07326</a>  | ENSG00000151665                  | Phosphatidylinositol-glycan 3 PI3F                       | PI3F             | 2p21       |       |          | yes        |              |                |                |         |         |              |             | Uncertain                            | Low tissue specificity    | Detected in all        |                                  |
| 736 | <a href="#">NX_Q9Y663</a>  | ENSG00000153976                  | Heparan sulfate glucosaminyltransferase 1 HS3ST3A1       | HS3ST3A1         | 17p12      |       |          | yes        |              |                |                |         | yes     | yes          |             | Uncertain                            | Low tissue specificity    | Detected in many       |                                  |
| 737 | <a href="#">NX_Q9NVL1</a>  | ENSG00000158483                  | Protein FAM86C1 FAM86C1                                  | FAM86C1          | 11q13.4    |       |          |            | yes          | yes            |                |         |         |              |             | N/A                                  | Low tissue specificity    | Detected in many       |                                  |
| 738 | <a href="#">NX_Q8N4L8</a>  | ENSG00000159214                  | Coiled-coil domain-containing protein 1 CCDC24           | CCDC24           | 1p34.1     |       |          |            |              | yes            |                |         |         |              |             | Uncertain                            | Low tissue specificity    | Detected in many       |                                  |
| 739 | <a href="#">NX_Q8N2E6</a>  | ENSG00000160404                  | Prosalsin TOR2A                                          | TOR2A            | 9q34.11    |       |          |            |              |                | yes            |         | yes     |              |             | Approved                             | Low tissue specificity    | Detected in all        |                                  |
| 740 | <a href="#">NX_Q3LFD5</a>  | ENSG00000161133                  | Putative ubiquitin carboxyl-terminal hydrolase 1 USP41   | USP41            | 22q11.21   |       |          |            |              | yes            |                |         |         |              |             | N/A                                  | Low tissue specificity    | Detected in some       |                                  |
| 741 | <a href="#">NX_Q8WU68</a>  | ENSG00000161265                  | Splicing factor U2AF 26 kDa U2AF1L4                      | U2AF1L4          | 19q13.12   |       |          |            |              |                | yes            |         |         |              |             | Supported                            | Low tissue specificity    | Detected in all        |                                  |
| 742 | <a href="#">NX_Q81WX5</a>  | ENSG00000163082                  | Sphingosine-1-phosphate phosphatase 2 SGPP2              | SGPP2            | 2q36.1     |       |          |            |              |                |                |         | yes     |              |             | N/A                                  | Low tissue specificity    | Detected in many       |                                  |
| 743 | <a href="#">NX_Q8N1N5</a>  | ENSG00000163945                  | Cysteine-rich PAK1 inhibitor CRIPAK                      | CRIPAK           | 4p16.3     |       |          |            | yes          | yes            |                |         | yes     |              |             | Approved                             | Low tissue specificity    | Detected in all        |                                  |
| 744 | <a href="#">NX_P40933</a>  | ENSG00000164136                  | Interleukin-15 IL15                                      | IL15             | 4q31.21    |       |          | yes        |              | yes            |                |         | yes     |              |             | Approved                             | Low tissue specificity    | Detected in many       |                                  |
| 745 | <a href="#">NX_A1L3X0</a>  | ENSG00000164181                  | Elongation of very long chain fatty acid synthase ELOVL7 | ELOVL7           | 5q12.1     |       |          |            |              | yes            |                |         | yes     | yes          |             | Approved                             | Low tissue specificity    | Detected in many       |                                  |
| 746 | <a href="#">NX_Q99527</a>  | ENSG00000164850                  | G-protein coupled estrogen receptor 1 GPER1              | GPER1            | 7p22.3     |       |          | yes        |              |                |                | yes     | yes     | yes          |             | Approved                             | Low tissue specificity    | Detected in all        |                                  |
| 747 | <a href="#">NX_Q8N6F8</a>  | ENSG00000165171                  | Methyltransferase-like protein 1 METTL27                 | METTL27          | 7q11.23    |       |          |            |              | yes            |                |         |         |              |             | Uncertain                            | Low tissue specificity    | Detected in many       |                                  |
| 74  |                            |                                  |                                                          |                  |            |       |          |            |              |                |                |         |         |              |             |                                      |                           |                        |                                  |

ST3\_Human Protein Atlas IHC and mRNA Data Added to neXtProt Data (ST2) for 950 Non-MS-Based neXtProt PE1 Proteins  
(ordered alphabetically by tissue with highest expression, Column S)

| 1   | A                             | B                 | C                            | D              | E          | F     | G        | H          | I            | J              | K              | L       | M       | N            | O           | P                                    | Q                         | R                      | S                                |
|-----|-------------------------------|-------------------|------------------------------|----------------|------------|-------|----------|------------|--------------|----------------|----------------|---------|---------|--------------|-------------|--------------------------------------|---------------------------|------------------------|----------------------------------|
|     | accession code                | Ensembl gene code | protein name                 | gene name(s)   | chromosome | Edman | textbook | Disease mu | 3D structure | SP curated PPI | IntAct PPI GOL | Exp PTM | Ab info | Exp function | mutagenesis | Tissue Atlas reliability score HPA19 | Consensus RNA Specificity | Consensus Distribution | Tissue(s) Most Enriched/Enhanced |
| 767 | <a href="#">NX_P59103</a>     | ENSG00000182346   | D-amino acid oxidase activ   | DAOA           | 13q33.2    |       |          |            |              | yes            |                |         |         | yes          |             | Uncertain                            | Not detected              | Not detected           |                                  |
| 768 | <a href="#">NX_Q8NG57</a>     | ENSG00000183791   | Elongin-A3                   | ELOA3          | 18q21.1    |       |          |            |              | yes            |                |         |         | yes          |             | Uncertain                            | Not detected              | Not detected           |                                  |
| 769 | <a href="#">NX_P34982</a>     | ENSG00000184166   | Olfactory receptor 1D2       | OR1D2          | 17p13.3    |       |          |            |              |                |                |         | yes     | yes          | yes         | N/A                                  | Low tissue specificity    | Detected in some       |                                  |
| 770 | <a href="#">NX_A2RRH5</a>     | ENSG00000184465   | WD repeat-containing prote   | WDR27          | 6q27       |       |          |            |              |                | yes            |         |         |              |             | Uncertain                            | Low tissue specificity    | Detected in all        |                                  |
| 771 | <a href="#">NX_Q2Z3Q9</a>     | ENSG00000184619   | KRAB-A domain-containing     | KRBA2          | 17p13.1    |       |          |            |              |                |                |         |         |              |             | Approved                             | Low tissue specificity    | Detected in all        |                                  |
| 772 | <a href="#">NX_Q8IU57</a>     | ENSG00000185436   | Interferon lambda receptor 1 | IFNLR1         | 1p36.11    |       |          | yes        |              | yes            |                |         |         | yes          |             | Uncertain                            | Low tissue specificity    | Detected in many       |                                  |
| 773 | <a href="#">NX_Q70Z44</a>     | ENSG00000186090   | 5-hydroxytryptamine recept   | HTR3D          | 3q27.1     |       |          |            |              | yes            | yes            |         |         | yes          |             | N/A                                  | Not detected              | Not detected           |                                  |
| 774 | <a href="#">NX_P0C025</a>     | ENSG00000186364   | Nucleoside diphosphate-link  | NUDT17         | 1q21.1     |       |          | yes        |              |                |                |         |         |              |             | Approved                             | Low tissue specificity    | Detected in all        |                                  |
| 775 | <a href="#">NX_P01566</a>     | ENSG00000186803   | Interferon alpha-10          | IFNA10         | 9p21.3     | yes   |          |            |              |                |                |         |         |              |             | Uncertain                            | Not detected              | Not detected           |                                  |
| 776 | <a href="#">NX_Q86X19</a>     | ENSG00000186889   | Transmembrane protein 17     | TMEM17         | 2p15       |       |          | yes        |              |                | yes            |         |         |              | yes         | Uncertain                            | Low tissue specificity    | Detected in many       |                                  |
| 777 | <a href="#">NX_Q3L166</a>     | ENSG00000186930   | Keratin-associated protein 6 | KRTAP6-2       | 21q22.11   |       |          |            |              |                | yes            |         |         | yes          |             | N/A                                  | Not detected              | Not detected           |                                  |
| 778 | <a href="#">NX_Q3L176</a>     | ENSG00000186970   | Keratin-associated protein 1 | KRTAP15-1      | 21q22.11   |       |          |            |              |                | yes            |         |         | yes          |             | N/A                                  | Not detected              | Not detected           |                                  |
| 779 | <a href="#">NX_Q9P0N5</a>     | ENSG00000187049   | Transmembrane protein 218    | TMEM216        | 11q12.2    |       |          | yes        |              | yes            |                |         |         | yes          |             | N/A                                  | Low tissue specificity    | Detected in all        |                                  |
| 780 | <a href="#">NX_P35212</a>     | ENSG00000187513   | Gap junction alpha-4 protein | GJA4           | 1p34.3     |       |          |            |              | yes            | yes            |         |         | yes          |             | Approved                             | Low tissue specificity    | Detected in many       |                                  |
| 781 | <a href="#">NX_Q969S6</a>     | ENSG00000187713   | Transmembrane protein 203    | TMEM203        | 9q34.3     |       |          |            |              | yes            |                |         |         | yes          |             | N/A                                  | Low tissue specificity    | Detected in all        |                                  |
| 782 | <a href="#">NX_Q0V999</a>     | ENSG00000188095   | Mesoderm posterior protein   | MESP2          | 15q26.1    |       |          |            |              |                |                |         |         | yes          | yes         | N/A                                  | Low tissue specificity    | Detected in many       |                                  |
| 783 | <a href="#">NX_Q1MX18</a>     | ENSG00000188487   | Protein inscuteable homolog  | INSC           | 11p15.2    |       |          | yes        |              | yes            |                |         |         | yes          | yes         | Enhanced                             | Low tissue specificity    | Detected in many       |                                  |
| 784 | <a href="#">NX_Q86UP8</a>     | ENSG00000196275   | General transcription factor | GTF2IRD2       | 7q11.23    |       |          |            |              |                | yes            |         |         |              |             | N/A                                  | Low tissue specificity    | Detected in all        |                                  |
| 785 | <a href="#">NX_A8MW95</a>     | ENSG00000196289   | Beclin-2                     | BECN2          | 1q43       |       |          | yes        |              | yes            | yes            |         | yes     | yes          | yes         | N/A                                  | Not detected              | Not detected           |                                  |
| 786 | <a href="#">NX_Q13765</a>     | ENSG00000196531   | Nascent polypeptide-associ   | NACA           | 12q13.3    |       |          | yes        |              | yes            | yes            | yes     | yes     | yes          | yes         | N/A                                  | Low tissue specificity    | Detected in all        |                                  |
| 787 | <a href="#">NX_Q5TYM5</a>     | ENSG00000196550   | Protein FAM72A               | FAM72A         | 1q32.1     |       |          |            |              | yes            | yes            |         |         | yes          | yes         | Uncertain                            | Low tissue specificity    | Detected in many       |                                  |
| 788 | <a href="#">NX_Q8TF45</a>     | ENSG00000196724   | Zinc finger protein 418      | ZNF418         | 19q13.43   |       |          |            |              | yes            |                |         |         | yes          |             | Approved                             | Low tissue specificity    | Detected in all        |                                  |
| 789 | <a href="#">NX_Q9XRX5</a>     | ENSG00000197568   | HERV-H LTR-associating p     | HHLA3          | 1p31.1     |       |          |            |              | yes            |                |         |         |              |             | Approved                             | Low tissue specificity    | Detected in all        |                                  |
| 790 | <a href="#">NX_Q8TE69</a>     | ENSG00000197620   | Protein CXorf40A             | CXorf40A       | Xq28       |       |          | yes        |              | yes            |                |         |         | yes          |             | Approved                             | Low tissue specificity    | Detected in all        |                                  |
| 791 | <a href="#">NX_Q9NTI7</a>     | ENSG00000197852   | PAK4-inhibitor INKA2         | INKA2          | 1p13.2     |       |          |            |              | yes            |                |         |         |              |             | Approved                             | Low tissue specificity    | Detected in many       |                                  |
| 792 | <a href="#">NX_Q7Z3Z2</a>     | ENSG00000198570   | Protein RD3                  | RD3            | 1q32.3     |       |          | yes        |              | yes            |                |         | yes     | yes          | yes         | Approved                             | Low tissue specificity    | Detected in many       |                                  |
| 793 | <a href="#">NX_Q6ZNS7</a>     | ENSG00000198939   | Zinc finger protein 2 homolo | ZFP2           | 5q35.3     |       |          |            |              |                | yes            |         |         |              |             | Uncertain                            | Low tissue specificity    | Detected in many       |                                  |
| 794 | <a href="#">NX_Q5TG14</a>     | ENSG00000203727   | Sterile alpha motif domain-d | SAMD5          | 6q24.3     |       |          |            |              |                |                |         | yes     |              |             | Uncertain                            | Low tissue specificity    | Detected in many       |                                  |
| 795 | <a href="#">NX_Q99678</a>     | ENSG00000204882   | G-protein coupled receptor   | GPR20          | 8q24.3     |       |          |            |              |                |                |         |         | yes          | yes         | N/A                                  | Low tissue specificity    | Detected in many       |                                  |
| 796 | <a href="#">NX_Q6PRD7</a>     | ENSG00000205923   | Cementoblastoma-derived p    | CEMP1          | 16p13.3    |       |          |            |              |                |                | yes     | yes     | yes          | yes         | Approved                             | Low tissue specificity    | Detected in many       |                                  |
| 797 | <a href="#">NX_Q504Y3</a>     | ENSG00000206559   | Zinc finger CW-type PWWP     | ZCWPW2         | 3p24.1     |       |          | yes        |              |                |                |         |         |              |             | Uncertain                            | Low tissue specificity    | Detected in many       |                                  |
| 798 | <a href="#">NX_Q9NYV8</a>     | ENSG00000212127   | Taste receptor type 2 mem    | TAS2R14        | 12p13.2    |       |          |            |              |                |                | yes     |         |              |             | N/A                                  | Low tissue specificity    | Detected in many       |                                  |
| 799 | <a href="#">NX_A6NNF4</a>     | ENSG00000213967   | Zinc finger protein 726      | ZNF726         | 19p12      |       |          |            |              | yes            |                |         |         |              |             | N/A                                  | Low tissue specificity    | Detected in all        |                                  |
| 800 | <a href="#">NX_Q9Y4R7</a>     | ENSG00000214021   | Tubulin monoglycylase TTL    | TTL3           | 3p25.3     |       |          |            |              |                |                |         | yes     | yes          | yes         | Approved                             | Low tissue specificity    | Detected in all        |                                  |
| 801 | <a href="#">NX_E9PJJ5</a>     | ENSG00000214967   | Nuclear pore complex-inter   | NPIPA7         | 16p13.11   |       |          |            |              |                | yes            |         |         |              |             | Approved                             | Low tissue specificity    | Detected in all        |                                  |
| 802 | <a href="#">NX_Q9NVV2</a>     | ENSG00000219166   | Putative uncharacterized pr  | C19orf73       | 19q13.33   |       |          |            |              | yes            |                |         |         |              |             | Uncertain                            | Low tissue specificity    | Detected in many       |                                  |
| 803 | <a href="#">NX_Q6R6M4</a>     | ENSG00000223443   | Ubiquitin carboxyl-terminal  | USP17L2        | 8p23.1     |       |          |            | yes          |                |                |         | yes     | yes          | yes         | Uncertain                            | Low tissue specificity    | Detected in some       |                                  |
| 804 | <a href="#">NX_P0DP91</a>     | ENSG00000225830   | Chimeric ERCC6-PGBD3 p       | ERCC6          | 10q11.23   |       |          | yes        |              |                |                |         | yes     | yes          | yes         | N/A                                  | Low tissue specificity    | Detected in all        |                                  |
| 805 | <a href="#">NX_Q8N328</a>     | ENSG00000225830   | PiggyBac transposable elem   | PGBD3          | 10q11.23   |       |          |            |              |                |                |         | yes     | yes          | yes         | N/A                                  | Low tissue specificity    | Detected in all        |                                  |
| 806 | <a href="#">NX_Q0WX57</a>     | ENSG00000228856   | Ubiquitin carboxyl-terminal  | USP17L24, USP1 | 4p16.1     |       |          |            |              |                |                |         | yes     | yes          |             | Uncertain                            | Not detected              | Not detected           |                                  |
| 807 | <a href="#">NX_P62945</a>     | ENSG00000229117   | 60S ribosomal protein L41    | RPL41          | 12q13.2    |       |          | yes        |              |                |                |         | yes     | yes          | yes         | Approved                             | Low tissue specificity    | Detected in all        |                                  |
| 808 | <a href="#">NX_P01571</a>     | ENSG00000234829   | Interferon alpha-17          | IFNA17         | 9p21.3     | yes   |          |            |              |                |                |         |         | yes          |             | Uncertain                            | Not detected              | Not detected           |                                  |
| 809 | <a href="#">NX_Q8NDX9</a>     | ENSG00000240053   | Lymphocyte antigen 6 comp    | LY6G5B         | 6p21.33    |       |          |            | yes          |                |                | yes     |         |              |             | Approved                             | Low tissue specificity    | Detected in all        |                                  |
| 810 | <a href="#">NX_Q3SY46</a>     | ENSG00000240432   | Keratin-associated protein 1 | KRTAP13-3      | 21q22.11   |       |          |            |              |                | yes            |         |         |              |             | N/A                                  | Not detected              | Not detected           |                                  |
| 811 | <a href="#">NX_P83881</a>     | ENSG00000241343   | 60S ribosomal protein L36a   | RPL36A         | Xq22.1     |       |          | yes        |              |                |                |         |         |              |             | Uncertain                            | Low tissue specificity    | Detected in all        |                                  |
| 812 | <a href="#">NX_Q96MZ4</a>     | ENSG00000250486   | Protein FAM218A              | FAM218A        | 4q32.3     |       |          |            |              |                | yes            |         |         |              |             | N/A                                  | Low tissue specificity    | Detected in many       |                                  |
| 813 | <a href="#">NX_P0CW20</a>     | ENSG00000256671   | LIM and senescent cell anti  | LIMS4          | 2q13       |       |          |            |              |                | yes            |         |         |              |             | Uncertain                            | Low tissue specificity    | Detected in many       |                                  |
| 814 | <a href="#">NX_Q01726</a>     | ENSG00000258839   | Melanocyte-stimulating hor   | MC1R           | 16q24.3    |       |          | yes        |              | yes            |                |         | yes     | yes          | yes         | N/A                                  | Low tissue specificity    | Detected in many       |                                  |
| 815 | <a href="#">NX_E9PQ53</a>     | ENSG00000259112   | NADH dehydrogenase [ubiq     | NDUFC2-KCTD1   | 11q14.1    |       |          |            | yes          | yes            |                |         |         |              |             | Approved                             | Low tissue specificity    | Detected in all        |                                  |
| 816 | <a href="#">NX_Q9Y5G1</a>     | ENSG00000262209   | Protocadherin gamma-B3       | PCDHGB3        | 5q31.3     |       |          | yes        |              |                |                |         |         | yes          |             | Uncertain                            | Low tissue specificity    | Detected in many       |                                  |
| 817 | <a href="#">NX_P63303</a>     | ENSG00000267697   | Leucine zipper protein 6     | LUZP6          | 7q33       |       |          |            |              |                |                |         |         |              |             | N/A                                  | Low tissue specificity    | Detected in all        |                                  |
| 818 | <a href="#">NX_P60409</a>     | ENSG00000272804   | Keratin-associated protein 1 | KRTAP10-7      | 21q22.23   |       |          |            |              | yes            | yes            |         |         | yes          |             | N/A                                  | Not detected              | Not detected           |                                  |
| 819 | <a href="#">NX_Q8WZ33</a>     | ENSG00000277400   | MaFF-interacting protein     | MAFIP          | 4          |       |          |            |              | yes            |                |         |         | yes          |             | N/A                                  | Low tissue specificity    | Detected in many       |                                  |
| 820 | <a href="#">NX_A053051K01</a> | ENSG00000284718   | Small cysteine and glycine r | SCYGR7         | 2q36.3     |       |          |            |              |                |                |         |         |              |             | N/A                                  | Not detected              | Not detected           |                                  |
| 821 | <a href="#">NX_A053051K02</a> | ENSG00000284725   | Small cysteine and glycine r | SCYGR6         | 2q36.3     |       |          |            |              |                |                |         |         |              |             | N/A                                  | Not detected              | Not detected           |                                  |
| 822 | <a href="#">NX_A0A075B6R0</a> |                   | T cell receptor gamma varia  | TRGV2          | 7p14.1     |       | yes      |            |              |                |                |         |         |              |             |                                      |                           |                        |                                  |
| 823 | <a href="#">NX_A0A075B6S0</a> |                   | T cell receptor gamma joini  | TRGJ1          | 7p14.1     |       | yes      |            |              |                |                |         |         |              |             |                                      |                           |                        |                                  |
| 824 | <a href="#">NX_A0A075B6T6</a> |                   | T cell receptor alpha varia  | TRAV12-2       | 14q11.2    |       | yes      | yes        |              |                |                |         |         |              |             |                                      |                           |                        |                                  |
| 825 | <a href="#">NX_A0A075B706</a> |                   | T cell receptor delta joini  | TRDJ1          | 14q11.2    |       | yes      |            |              |                |                |         |         |              |             |                                      |                           |                        |                                  |
| 826 | <a href="#">NX_A0A087W101</a> |                   | T cell receptor alpha varia  | TRAV27         | 14q11.2    |       | yes      | yes        | yes          |                |                |         |         |              |             |                                      |                           |                        |                                  |
| 827 | <a href="#">NX_A0A0B4J1U4</a> |                   | T cell receptor gamma varia  | TRGV5          | 7p14.1     |       | yes      |            |              |                |                |         |         |              |             |                                      |                           |                        |                                  |
| 828 | <a href="#">NX_A0A0B4J268</a> |                   | T cell receptor alpha varia  | TRAV4          | 14q11.2    |       | yes      | yes        |              |                |                |         |         |              |             |                                      |                           |                        |                                  |
| 829 | <a href="#">NX_A0A0B4J271</a> |                   | T cell receptor alpha varia  | TRAV12-3       | 14q11.2    |       | yes      | yes        |              |                |                |         |         |              |             |                                      |                           |                        |                                  |
| 830 | <a href="#">NX_A0A0B4J272</a> |                   | T cell receptor alpha varia  | TRAV24         | 14q11.2    |       | yes      | yes        |              |                |                |         |         |              |             |                                      |                           |                        |                                  |
| 831 | <a href="#">NX_A0A0B4J277</a> |                   | T cell receptor alpha varia  | TRAV22         | 14q11.2    |       | yes      | yes        |              |                |                |         |         |              |             |                                      |                           |                        |                                  |
| 832 | <a href="#">NX_A0A0B4J279</a> |                   | T cell receptor alpha varia  | TRAV21         | 14q11.2    |       | yes      | yes        |              |                |                |         |         |              |             |                                      |                           |                        |                                  |
| 833 | <a href="#">NX_A0A0B4J2E0</a> |                   | T cell receptor beta varia   | TRBV12-4       | 7q34       |       | yes      | yes        |              |                |                |         |         |              |             |                                      |                           |                        |                                  |
| 834 | <a href="#">NX_A0A0C4DH27</a> |                   | T cell receptor gamma varia  | TRGV8          | 7p14.1     |       | yes      |            |              |                |                |         |         |              |             |                                      |                           |                        |                                  |
| 835 | <a href="#">NX_A0A0C4DH28</a> |                   | T cell receptor gamma varia  | TRGV4          | 7p14.1     |       | yes      |            |              |                |                |         |         |              |             |                                      |                           |                        |                                  |
| 836 | <a href="#">NX_A0A0C5B5G6</a> |                   | Mitochondrial-derived pepti  | MT-RNR1        | MT         |       |          |            |              |                |                | yes     | yes     | yes          | yes         |                                      |                           |                        |                                  |
| 837 | <a href="#">NX_A0A0K0K1A5</a> |                   | T cell receptor beta varia   | TRBV6-5        | 7q34       |       | yes      | yes        | yes          |                |                |         |         | yes          | yes         |                                      |                           |                        |                                  |
| 838 | <a href="#">NX_A0A0K2S4Q6</a> |                   | Protein CD300H               | CD3            |            |       |          |            |              |                |                |         |         |              |             |                                      |                           |                        |                                  |

ST3\_Human Protein Atlas IHC and mRNA Data Added to neXtProt Data (ST2) for 950 Non-MS-Based neXtProt PE1 Proteins  
(ordered alphabetically by tissue with highest expression, Column S)

| 1   | A                          | B                 | C                                          | D                | E            | F     | G        | H          | I            | J              | K              | L       | M       | N            | O           | P                                    | Q                         | R                      | S                                |
|-----|----------------------------|-------------------|--------------------------------------------|------------------|--------------|-------|----------|------------|--------------|----------------|----------------|---------|---------|--------------|-------------|--------------------------------------|---------------------------|------------------------|----------------------------------|
|     | accession code             | Ensembl gene code | protein name                               | gene name(s)     | chromosome   | Edman | textbook | Disease mu | 3D structure | SP curated PPI | IntAct PPI GOL | Exp PTM | Ab info | Exp function | mutagenesis | Tissue Atlas reliability score HPA19 | Consensus RNA Specificity | Consensus Distribution | Tissue(s) Most Enriched/Enhanced |
| 852 | <a href="#">NX_O43812</a>  |                   | Double homeobox protein 1                  | DUX1             | 10q26.3      |       |          |            |              |                | yes            |         |         | yes          |             |                                      |                           |                        |                                  |
| 853 | <a href="#">NX_O71037</a>  |                   | Endogenous retrovirus group 1              | ERVK-19          | 19q11        |       |          |            |              |                |                |         |         | yes          |             |                                      |                           |                        |                                  |
| 854 | <a href="#">NX_P01611</a>  |                   | Immunoglobulin kappa variable 1            | IGKV1D-12        | 2p11.2       | yes   | yes      |            |              |                |                |         |         |              |             |                                      |                           |                        |                                  |
| 855 | <a href="#">NX_P01733</a>  |                   | T cell receptor beta variable 1            | TRBV12-3         | 7q34         |       | yes      |            |              |                |                |         |         |              |             |                                      |                           |                        |                                  |
| 856 | <a href="#">NX_P01768</a>  |                   | Immunoglobulin heavy variable 1            | IGHV3-30         | 14q32.33     | yes   | yes      |            |              |                |                | yes     |         |              |             |                                      |                           |                        |                                  |
| 857 | <a href="#">NX_P03979</a>  |                   | T cell receptor gamma variable 1           | TRGV3            | 7p14.1       |       | yes      |            |              |                |                |         |         |              |             |                                      |                           |                        |                                  |
| 858 | <a href="#">NX_P09565</a>  |                   | Putative insulin-like growth factor 1      | GIG44, PP9974    | 11p15.5      |       |          |            |              |                | yes            |         |         |              |             |                                      |                           |                        |                                  |
| 859 | <a href="#">NX_P0CF51</a>  |                   | T cell receptor gamma constant 1           | TRGC1            | 7p14.1       |       | yes      |            | yes          |                |                |         |         |              |             |                                      |                           |                        |                                  |
| 860 | <a href="#">NX_P0CG04</a>  |                   | Immunoglobulin lambda constant 1           | IGLC1            | 22q11.22     | yes   | yes      |            | yes          |                |                | yes     |         |              |             |                                      |                           |                        |                                  |
| 861 | <a href="#">NX_P0CL82</a>  |                   | G antigen 12I                              | GAGE12I          | Xp11.23      |       |          |            |              | yes            | yes            |         |         |              |             |                                      |                           |                        |                                  |
| 862 | <a href="#">NX_P0DJ04</a>  |                   | RNA-binding motif protein, Y               | RBM1C            | Yq11.23      |       |          |            |              | yes            |                |         |         | yes          |             |                                      |                           |                        |                                  |
| 863 | <a href="#">NX_P0DP06</a>  |                   | Endothelin-converting enzyme 2             | ECE2             | 3q27.1       |       |          |            |              |                |                |         |         | yes          |             |                                      |                           |                        |                                  |
| 864 | <a href="#">NX_P0DP06</a>  |                   | EEF1AKMT4-ECE2 readthrough                 | EEF1AKMT4-EC     | 3q27.1       |       |          |            |              |                |                |         |         |              |             |                                      |                           |                        |                                  |
| 865 | <a href="#">NX_P0DPI2</a>  |                   | Glutamine amidotransferase 2               | GATD3A           | 21q22.3      | yes   |          |            |              |                |                |         |         |              |             |                                      |                           |                        |                                  |
| 866 | <a href="#">NX_P0DPK2</a>  |                   | Histone H3.Y                               |                  | 5p15.1       |       |          | yes        | yes          |                |                |         |         | yes          | yes         |                                      |                           |                        |                                  |
| 867 | <a href="#">NX_P0DPK3</a>  |                   | Notch homolog 2 N-terminal                 | NOTCH2NLB        | 1q21.2       |       |          |            |              | yes            |                |         |         | yes          |             |                                      |                           |                        |                                  |
| 868 | <a href="#">NX_P0DPK4</a>  |                   | Notch homolog 2 N-terminal                 | NOTCH2NLC        | 1q21.2       |       |          |            |              | yes            |                |         |         | yes          |             |                                      |                           |                        |                                  |
| 869 | <a href="#">NX_P0DPQ6</a>  |                   | DDIT3 upstream open reading frame 1        | DDIT3            | 12q13.3      |       |          |            |              | yes            |                |         |         |              |             |                                      |                           |                        |                                  |
| 870 | <a href="#">NX_P0DPR3</a>  |                   | T cell receptor delta variable 1           | TRDD1            | 14q11.2      |       | yes      |            |              |                |                |         |         |              |             |                                      |                           |                        |                                  |
| 871 | <a href="#">NX_P10265</a>  |                   | Endogenous retrovirus group 1              | ERVK-10          | 5q33.3       | yes   |          |            |              | yes            |                | yes     |         | yes          | yes         |                                      |                           |                        |                                  |
| 872 | <a href="#">NX_P31995</a>  |                   | Low affinity immunoglobulin gamma 1        | FCGR2C           | 1q23.3       |       |          |            | yes          |                | yes            | yes     |         | yes          |             |                                      |                           |                        |                                  |
| 873 | <a href="#">NX_P40205</a>  |                   | N-cym protein                              | MYCNOS           | 2p24.3       |       |          |            |              | yes            |                |         | yes     | yes          |             |                                      |                           |                        |                                  |
| 874 | <a href="#">NX_P43627</a>  |                   | Killer cell immunoglobulin-like receptor 1 | KIR2DL2          | 19           |       |          | yes        |              |                |                |         |         | yes          |             |                                      |                           |                        |                                  |
| 875 | <a href="#">NX_P43631</a>  |                   | Killer cell immunoglobulin-like receptor 2 | KIR2DS2          | 19           |       |          | yes        |              |                |                |         |         | yes          |             |                                      |                           |                        |                                  |
| 876 | <a href="#">NX_P43632</a>  |                   | Killer cell immunoglobulin-like receptor 3 | KIR2DS4          | 19, 19q13.42 |       |          | yes        | yes          | yes            | yes            |         |         | yes          |             |                                      |                           |                        |                                  |
| 877 | <a href="#">NX_P47884</a>  |                   | Olfactory receptor 1D4                     | OR1D4            | 17p13.3      |       |          |            |              | yes            |                |         |         |              |             |                                      |                           |                        |                                  |
| 878 | <a href="#">NX_P60008</a>  |                   | Spermatid-specific linker histone 1        | HILS1            | 17q21.33     |       |          |            |              |                |                |         |         | yes          |             |                                      |                           |                        |                                  |
| 879 | <a href="#">NX_P60507</a>  |                   | Endogenous retrovirus group 1              | ERVFC1           | Xq21.33      |       |          |            |              |                |                |         |         | yes          |             |                                      |                           |                        |                                  |
| 880 | <a href="#">NX_P60608</a>  |                   | Endogenous retrovirus group 1              | ERVFC1-1         | 7q36.2       |       |          |            |              |                |                |         |         | yes          |             |                                      |                           |                        |                                  |
| 881 | <a href="#">NX_P61565</a>  |                   | Endogenous retrovirus group 1              | ERVK-21          | 12q14.1      |       |          |            |              |                |                |         |         | yes          |             |                                      |                           |                        |                                  |
| 882 | <a href="#">NX_P61571</a>  |                   | Endogenous retrovirus group 1              | ERVK-21          | 12q14.1      |       |          |            |              |                |                |         |         |              |             |                                      |                           |                        |                                  |
| 883 | <a href="#">NX_P61572</a>  |                   | Endogenous retrovirus group 1              | ERVK-19          | 19q12        |       |          |            |              |                |                |         |         |              |             |                                      |                           |                        |                                  |
| 884 | <a href="#">NX_P61573</a>  |                   | Endogenous retrovirus group 1              | ERVK-9           | 6q14.1       |       |          |            |              |                |                |         |         |              |             |                                      |                           |                        |                                  |
| 885 | <a href="#">NX_P61574</a>  |                   | Endogenous retrovirus group 1              | HERVK_113        | 19p13.11     |       |          |            |              |                |                |         |         |              |             |                                      |                           |                        |                                  |
| 886 | <a href="#">NX_P61575</a>  |                   | Endogenous retrovirus group 1              | ERVK-8           | 8p23.1       |       |          |            |              |                |                |         |         |              |             |                                      |                           |                        |                                  |
| 887 | <a href="#">NX_P61576</a>  |                   | Endogenous retrovirus group 1              | HERV-K104        | 5q13.3       |       |          |            |              |                |                |         |         |              |             |                                      |                           |                        |                                  |
| 888 | <a href="#">NX_P61578</a>  |                   | Endogenous retrovirus group 1              | ERVK-16          | 10p14        |       |          |            |              |                |                |         |         |              |             |                                      |                           |                        |                                  |
| 889 | <a href="#">NX_P61579</a>  |                   | Endogenous retrovirus group 1              | ERVK-25          | 11q22.1      |       |          |            |              |                |                |         |         |              |             |                                      |                           |                        |                                  |
| 890 | <a href="#">NX_P61580</a>  |                   | Endogenous retrovirus group 1              | ERVK-10          | 5q33.3       |       |          |            |              |                |                |         |         |              |             |                                      |                           |                        |                                  |
| 891 | <a href="#">NX_P61581</a>  |                   | Endogenous retrovirus group 1              | ERVK-24          | 22q11.21     |       |          |            |              |                |                |         |         | yes          |             |                                      |                           |                        |                                  |
| 892 | <a href="#">NX_P62683</a>  |                   | Endogenous retrovirus group 1              | ERVK-21          | 12q14.1      |       |          |            |              |                |                |         |         | yes          |             |                                      |                           |                        |                                  |
| 893 | <a href="#">NX_P62684</a>  |                   | Endogenous retrovirus group 1              | HERVK_113        | 19p13.11     |       |          |            |              |                |                |         |         | yes          |             |                                      |                           |                        |                                  |
| 894 | <a href="#">NX_P62685</a>  |                   | Endogenous retrovirus group 1              | ERVK-8           | 8p23.1       |       |          |            |              |                |                |         |         | yes          |             |                                      |                           |                        |                                  |
| 895 | <a href="#">NX_P63126</a>  |                   | Endogenous retrovirus group 1              | ERVK-9           | 6q14.1       |       |          |            |              |                |                |         |         | yes          |             |                                      |                           |                        |                                  |
| 896 | <a href="#">NX_P63145</a>  |                   | Endogenous retrovirus group 1              | ERVK-24          | 22q11.21     |       |          |            |              |                |                |         |         | yes          |             |                                      |                           |                        |                                  |
| 897 | <a href="#">NX_P87889</a>  |                   | Endogenous retrovirus group 1              | ERVK-10          | 5q33.3       |       |          |            |              |                |                |         |         | yes          |             |                                      |                           |                        |                                  |
| 898 | <a href="#">NX_Q08E93</a>  |                   | Protein FAM27E3                            | FAM27E3          | 9q21.11      |       |          |            |              |                | yes            |         |         |              |             |                                      |                           |                        |                                  |
| 899 | <a href="#">NX_Q13066</a>  |                   | G antigen 2B/2C                            | GAGE2B, GAGE2C   | Xp11.23      |       |          |            |              |                | yes            |         |         | yes          |             |                                      |                           |                        |                                  |
| 900 | <a href="#">NX_Q13069</a>  |                   | G antigen 5                                | GAGE5            | Xp11.2-p11.4 |       |          |            |              |                | yes            |         |         |              |             |                                      |                           |                        |                                  |
| 901 | <a href="#">NX_Q13070</a>  |                   | G antigen 6                                | GAGE6            | Xp11.2-p11.4 |       |          |            |              |                | yes            |         |         |              |             |                                      |                           |                        |                                  |
| 902 | <a href="#">NX_Q14863</a>  |                   | POU domain, class 6, transcribed 1         | POU6F1           | 12q13.13     |       |          | yes        |              |                |                |         |         |              |             |                                      |                           |                        |                                  |
| 903 | <a href="#">NX_Q14943</a>  |                   | Killer cell immunoglobulin-like receptor 3 | KIR3DS1          | 19           |       |          |            | yes          | yes            | yes            |         |         | yes          |             |                                      |                           |                        |                                  |
| 904 | <a href="#">NX_Q14953</a>  |                   | Killer cell immunoglobulin-like receptor 2 | KIR2DS5          | 19           |       |          |            | yes          | yes            | yes            | yes     |         | yes          | yes         |                                      |                           |                        |                                  |
| 905 | <a href="#">NX_Q14954</a>  |                   | Killer cell immunoglobulin-like receptor 3 | KIR2DS1          | 19           |       |          |            | yes          |                |                |         |         | yes          |             |                                      |                           |                        |                                  |
| 906 | <a href="#">NX_Q156A1</a>  |                   | Ataxin-8                                   | ATXN8            | 13q21        |       |          |            |              |                |                |         | yes     |              |             |                                      |                           |                        |                                  |
| 907 | <a href="#">NX_Q3KNS1</a>  |                   | Patched domain-containing protein 1        | PTCHD3           | 10p12.1      |       |          |            |              |                |                |         | yes     | yes          |             |                                      |                           |                        |                                  |
| 908 | <a href="#">NX_Q3Y452</a>  |                   | Testis development-related protein 1       | TDRG1            | 6p21.2       |       |          |            |              |                |                |         | yes     |              |             |                                      |                           |                        |                                  |
| 909 | <a href="#">NX_Q51020</a>  |                   | Inactive N-acetyllactosaminidase 1         | GGTA1P           | 9q33.2       |       |          |            |              |                |                |         |         |              |             |                                      |                           |                        |                                  |
| 910 | <a href="#">NX_Q58A44</a>  |                   | Prostate collagen triple helix 1           | PCOTH            | 13q12.12     |       |          |            |              |                | yes            |         |         | yes          |             |                                      |                           |                        |                                  |
| 911 | <a href="#">NX_Q5BKY6</a>  |                   | Putative uncharacterized protein           |                  | 22q11.21     |       |          |            |              |                | yes            |         |         |              |             |                                      |                           |                        |                                  |
| 912 | <a href="#">NX_Q5RGS3</a>  |                   | Protein FAM74A1                            | FAM74A1          | 9p12         |       |          |            |              |                | yes            |         |         |              |             |                                      |                           |                        |                                  |
| 913 | <a href="#">NX_Q5V185</a>  |                   | Small integral membrane protein 1          | SMIM40           | 6p21.32      |       |          |            |              |                |                |         |         |              |             |                                      |                           |                        |                                  |
| 914 | <a href="#">NX_Q5TZK3</a>  |                   | Protein FAM74A4/A6                         | FAM74A4, FAM74A6 | 9q12         |       |          |            |              |                | yes            |         |         |              |             |                                      |                           |                        |                                  |
| 915 | <a href="#">NX_Q5W150</a>  |                   | Putative uncharacterized protein           |                  | 20q11.21     |       |          |            |              |                | yes            |         |         |              |             |                                      |                           |                        |                                  |
| 916 | <a href="#">NX_Q66K41</a>  |                   | Zinc finger protein 385C                   | ZNF385C          | 17q21.2      |       |          |            |              |                | yes            |         |         |              |             |                                      |                           |                        |                                  |
| 917 | <a href="#">NX_Q69383</a>  |                   | Endogenous retrovirus group 1              | ERVK-6           | 7q22.1       |       |          |            | yes          |                |                |         |         | yes          | yes         |                                      |                           |                        |                                  |
| 918 | <a href="#">NX_Q69384</a>  |                   | Endogenous retrovirus group 1              | ERVK-6           | 7p22.1       |       |          |            |              |                |                |         |         | yes          |             |                                      |                           |                        |                                  |
| 919 | <a href="#">NX_Q6L8H1</a>  |                   | Keratin-associated protein 5               | KRTAP5-4         | 11p15.5      |       |          |            | yes          | yes            |                |         |         | yes          |             |                                      |                           |                        |                                  |
| 920 | <a href="#">NX_Q6QN14</a>  |                   | Ubiquitin carboxyl-terminal hydrolase 1    | USP17L6P         | 4p16.1       |       |          |            |              |                |                |         |         | yes          | yes         |                                      |                           |                        |                                  |
| 921 | <a href="#">NX_Q6RFH8</a>  |                   | Double homeobox protein 4                  | DUX4L9           | 4q35.2       |       |          |            | yes          | yes            | yes            | yes     |         | yes          |             |                                      |                           |                        |                                  |
| 922 | <a href="#">NX_Q6LXS9</a>  |                   | Inactive caspase-12                        | CASP12           | 11q22.3      |       |          |            |              |                | yes            |         |         | yes          |             |                                      |                           |                        |                                  |
| 923 | <a href="#">NX_Q6ZPB5</a>  |                   | Stress-responsive DNAJB4                   | SDIM1            | 6q27         |       |          |            | yes          |                |                |         | yes     | yes          |             |                                      |                           |                        |                                  |
| 924 | <a href="#">NX_Q6ZSM3</a>  |                   | Monocarboxylate transporter 1              | SLC16A12         | 10q23.31     |       |          |            | yes          |                |                |         |         | yes          | yes         | yes                                  |                           |                        |                                  |
| 925 | <a href="#">NX_Q6ZT62</a>  |                   | Bargin                                     | BARGIN           | 22q13.1      |       |          |            |              |                |                |         | yes     | yes          |             |                                      |                           |                        |                                  |
| 926 | <a href="#">NX_Q7LDI9</a>  |                   | Endogenous retrovirus group 1              | ERVK-6           | 7p22.1       |       |          |            |              |                |                |         |         | yes          |             |                                      |                           |                        |                                  |
| 927 | <a href="#">NX_Q7Z442</a>  |                   | Polycystic kidney disease protein 1        | PKD1L2           | 16q23.2      |       |          |            |              | yes            |                |         |         | yes          |             |                                      |                           |                        |                                  |
| 928 | <a href="#">NX_Q86UQ8</a>  |                   | Transcription factor NF-E4                 | NFE4             | 7q22.1       | yes   |          |            |              | yes            | yes            | yes     |         | yes          | yes         |                                      |                           |                        |                                  |
| 929 | <a href="#">NX_Q86X59</a>  |                   | Putative uncharacterized protein           | C17orf82         | 17q23.2      |       |          |            |              |                | yes            |         |         |              |             |                                      |                           |                        |                                  |
| 930 | <a href="#">NX_Q8IVG9</a>  |                   | Humanin                                    | MT-RNR2          | MT           |       |          | yes        | yes          | yes            | yes            |         |         | yes          | yes         |                                      |                           |                        |                                  |
| 931 | <a href="#">NX_Q8IZS5</a>  |                   | Orofacial cleft 1 candidate gene 1         | OFCC1            | 6p24.3       |       |          |            |              |                | yes            | yes     |         |              |             |                                      |                           |                        |                                  |
| 932 | <a href="#">NX_Q8N2X6</a>  |                   | Uncharacterized protein EXO3-AS1           | EXO3-AS1         | 5p15.33      |       |          |            |              |                | yes            |         |         |              |             |                                      |                           |                        |                                  |
| 933 | <a href="#">NX_Q8N9R6</a>  |                   | CMT1A duplicated region transcript 1       | CDRT4            | 17p12        |       |          |            |              |                | yes            |         |         |              |             |                                      |                           |                        |                                  |
| 934 | <a href="#">NX_Q8NCU1</a>  |                   | Uncharacterized protein CC                 | CCDC197          | 14q32.12     |       |          |            |              |                | yes            |         |         |              |             |                                      |                           |                        |                                  |
| 935 | <a href="#">NX_Q8NEA9</a>  |                   | Germ cell-less protein-like 2              | GMCL2            | 5q35.3       |       |          |            | yes          | yes            |                |         |         | yes          |             |                                      |                           |                        |                                  |
| 936 | <a href="#">NX_Q8WVWF6</a> |                   | DnaJ homolog subfamily B member 3          | DNAJB3           | 2q37.1       |       |          | yes        |              |                |                |         | yes     |              |             |                                      |                           |                        |                                  |



| uniprot_id | ensg_id  | display_name | ih_reliabil | tissue_cat | tissue_abu | specific_tissues                              |
|------------|----------|--------------|-------------|------------|------------|-----------------------------------------------|
| A0A0B4J2   | ENSG0000 | FP565260     | Uncertain   | Tissue enh | Detected   | i blood                                       |
| A0A286YE   | ENSG0000 | AC064853     | NULL        | Tissue enh | Detected   | i blood,epididymis,placenta                   |
| A0A286YE   | ENSG0000 | AC064853     | NULL        | Group enr  | Detected   | i lymphoid tissue,testis                      |
| A0A286YE   | ENSG0000 | AC097662     | NULL        | Tissue enh | Detected   | i intestine                                   |
| A0A286YF   | ENSG0000 | AC093762     | NULL        | Not detect | Not detect | NULL                                          |
| A0A286YF   | ENSG0000 | AC064853     | NULL        | Tissue enr | Detected   | i placenta                                    |
| A0A286YF   | ENSG0000 | AC064853     | NULL        | Tissue enr | Detected   | i placenta                                    |
| A0A286YF   | ENSG0000 | AC093762     | NULL        | Not detect | Not detect | NULL                                          |
| A0A286YF   | ENSG0000 | AC064853     | NULL        | Tissue enh | Detected   | i adipose tissue                              |
| A0A286YF   | ENSG0000 | AC093762     | NULL        | Tissue enr | Detected   | i skin 1                                      |
| A0PJY2     | ENSG0000 | FEZF1        | Approved    | Group enr  | Detected   | i brain,testis                                |
| A1A4Y4     | ENSG0000 | IRGM         | NULL        | Tissue enh | Detected   | i blood                                       |
| A1A580     | ENSG0000 | KRTAP23-     | NULL        | Tissue enr | Detected   | i skin 1                                      |
| A1L167     | ENSG0000 | UBE2QL1      | NULL        | Group enr  | Detected   | i brain,heart muscle,retina,seminal vesicle,s |
| A1L3X0     | ENSG0000 | ELOVL7       | Approved    | Low tissue | Detected   | i NULL                                        |
| A1L429     | ENSG0000 | GAGE12C      | Supported   | Tissue enr | Detected   | i testis                                      |
| A2A2Z9     | ENSG0000 | ANKRD18f     | Uncertain   | Tissue enh | Detected   | i brain,testis                                |
| A2RRH5     | ENSG0000 | WDR27        | Uncertain   | Low tissue | Detected   | i NULL                                        |
| A2RU14     | ENSG0000 | TMEM218      | Uncertain   | Low tissue | Detected   | i NULL                                        |
| A4GXA9     | ENSG0000 | EME2         | Uncertain   | Tissue enh | Detected   | i brain                                       |
| A5D8T8     | ENSG0000 | CLEC18A      | Uncertain   | Tissue enr | Detected   | i kidney                                      |
| A5LHX3     | ENSG0000 | PSMB11       | Enhanced    | Tissue enr | Detected   | i lymphoid tissue                             |
| A5X5Y0     | ENSG0000 | HTR3E        | Enhanced    | Tissue enr | Detected   | i intestine                                   |
| A6NCC3     | ENSG0000 | GOLGA80      | NULL        | Tissue enh | Detected   | i testis                                      |
| A6NCL1     | ENSG0000 | GMNC         | Uncertain   | Tissue enh | Detected   | i fallopian tube,kidney,liver                 |
| A6NCS4     | ENSG0000 | NKX2-6       | NULL        | Tissue enh | Detected   | i ductus deferens,heart muscle,lymphoid tis   |
| A6NDV4     | ENSG0000 | TMEM8B       | Approved    | Low tissue | Detected   | i NULL                                        |
| A6NEM1     | ENSG0000 | GOLGA6L5     | NULL        | Tissue enh | Detected   | i stomach 1                                   |
| A6NGG8     | ENSG0000 | C2orf71      | NULL        | Tissue enr | Detected   | i retina                                      |
| A6NI61     | ENSG0000 | MYMK         | Uncertain   | Tissue enh | Detected   | i brain,epididymis,skeletal muscle            |
| A6NIM6     | ENSG0000 | SLC15A5      | Uncertain   | Group enr  | Detected   | i adipose tissue,brain,breast,testis          |
| A6NJB7     | ENSG0000 | PRR19        | NULL        | Tissue enr | Detected   | i testis                                      |
| A6NJZ7     | ENSG0000 | RIMBP3C      | Supported   | Tissue enr | Detected   | i testis                                      |
| A6NMN3     | ENSG0000 | FAM170B      | Uncertain   | Group enr  | Detected   | i blood,testis                                |
| A6NNB3     | ENSG0000 | IFITM5       | NULL        | Tissue enr | Detected   | i pancreas                                    |
| A6NND4     | ENSG0000 | OR2AT4       | NULL        | Tissue enh | Detected   | i blood,bone marrow                           |
| A6NNF4     | ENSG0000 | ZNF726       | NULL        | Low tissue | Detected   | i NULL                                        |
| A6NNM8     | ENSG0000 | TLL13P       | Enhanced    | Tissue enr | Detected   | i testis                                      |
| A6NNN8     | ENSG0000 | SLC38A8      | NULL        | Tissue enh | Detected   | i brain,liver                                 |
| A8K0Z3     | ENSG0000 | WASHC1       | Uncertain   | Low tissue | Detected   | i NULL                                        |
| A8MW95     | ENSG0000 | BECN2        | NULL        | Not detect | Not detect | NULL                                          |
| A8MXD5     | ENSG0000 | GRXCR1       | Uncertain   | Tissue enr | Detected   | i seminal vesicle                             |
| B2CW77     | ENSG0000 | KLLN         | NULL        | Tissue enh | Detected   | i blood,skeletal muscle                       |
| B2RXH2     | ENSG0000 | KDM4E        | Uncertain   | Tissue enh | Detected   | i skin 1                                      |
| B3KU38     | ENSG0000 | IQCJ-SCHIF   | Approved    | Tissue enh | Detected   | i brain                                       |
| B7U540     | ENSG0000 | KCNJ18       | Uncertain   | Group enr  | Detected   | i lymphoid tissue,skin 1                      |

|        |                    |           |                                                               |
|--------|--------------------|-----------|---------------------------------------------------------------|
| B7ZAP0 | ENSG0000 RABGAP1L  | Uncertain | Tissue enh Detected i heart muscle                            |
| C9JR72 | ENSG0000 KBTBD13   | Uncertain | Tissue enh Detected i heart muscle,skeletal muscle,tongue     |
| D3WOD1 | ENSG0000 KLRF2     | NULL      | Tissue enh Detected i blood,skin 1                            |
| E2RYF6 | ENSG0000 MUC22     | NULL      | Tissue enr Detected i esophagus                               |
| E9PJI5 | ENSG0000 NPIPA7    | Approved  | Low tissue Detected i NULL                                    |
| E9PQ53 | ENSG0000 NDUFC2-K  | Approved  | Low tissue Detected i NULL                                    |
| O00155 | ENSG0000 GPR25     | NULL      | Tissue enh Detected i blood,lymphoid tissue,stomach 1         |
| O00198 | ENSG0000 HRK       | Uncertain | Tissue enh Detected i brain,lymphoid tissue,thyroid gland     |
| O00230 | ENSG0000 CORT      | NULL      | Tissue enr Detected i brain                                   |
| O00254 | ENSG0000 F2RL2     | NULL      | Tissue enh Detected i retina                                  |
| O00631 | ENSG0000 SLN       | NULL      | Tissue enr Detected i skeletal muscle                         |
| O14599 | ENSG0000 BPY2,BPY2 | NULL      | Tissue enr Detected i testis                                  |
| O14602 | ENSG0000 EIF1AY    | Uncertain | Tissue enh Detected i heart muscle,skeletal muscle            |
| O14603 | ENSG0000 PRY,PRY2  | Uncertain | Group enr Detected i blood,epididymis,testis                  |
| O14604 | ENSG0000 TMSB4Y    | NULL      | Tissue enh Detected i brain                                   |
| O14627 | ENSG0000 CDX4      | Uncertain | Group enr Detected i skin 1,testis                            |
| O14633 | ENSG0000 LCE2B     | NULL      | Tissue enr Detected i skin 1                                  |
| O14842 | ENSG0000 FFAR1     | NULL      | Tissue enh Detected i bone marrow,brain,ovary,pancreas        |
| O14843 | ENSG0000 FFAR3     | Uncertain | Tissue enh Detected i adipose tissue,blood,lymphoid tissue    |
| O15105 | ENSG0000 SMAD7     | Approved  | Low tissue Detected i NULL                                    |
| O15146 | ENSG0000 MUSK      | NULL      | Tissue enr Detected i skeletal muscle                         |
| O15353 | ENSG0000 FOXN1     | NULL      | Tissue enh Detected i esophagus,lymphoid tissue,skin 1,tongue |
| O15457 | ENSG0000 MSH4      | NULL      | Tissue enr Detected i testis                                  |
| O15529 | ENSG0000 GPR42     | Uncertain | Tissue enh Detected i adipose tissue,blood,intestine          |
| O15547 | ENSG0000 P2RX6     | Approved  | Tissue enh Detected i skeletal muscle                         |
| O43316 | ENSG0000 PAX4      | NULL      | Group enr Detected i intestine,testis                         |
| O43320 | ENSG0000 FGF16     | NULL      | Tissue enh Detected i adipose tissue,seminal vesicle          |
| O43364 | ENSG0000 HOXA2     | NULL      | Tissue enh Detected i brain                                   |
| O43612 | ENSG0000 HCRT      | Enhanced  | Tissue enr Detected i brain                                   |
| O43613 | ENSG0000 HCRTR1    | Approved  | Tissue enh Detected i brain                                   |
| O43614 | ENSG0000 HCRTR2    | Enhanced  | Tissue enr Detected i brain                                   |
| O43763 | ENSG0000 TLX2      | Uncertain | Tissue enh Detected i adrenal gland,brain,retina              |
| O43825 | ENSG0000 B3GALT2   | NULL      | Tissue enh Detected i brain,gallbladder,heart muscle          |
| O43918 | ENSG0000 AIRE      | Uncertain | Tissue enh Detected i brain,lymphoid tissue                   |
| O60224 | ENSG0000 SSX4,SSX4 | Approved  | Tissue enr Detected i testis                                  |
| O60682 | ENSG0000 MSC       | NULL      | Tissue enh Detected i breast                                  |
| O60755 | ENSG0000 GALR3     | NULL      | Tissue enh Detected i brain,skeletal muscle                   |
| O60806 | ENSG0000 TBX19     | Enhanced  | Tissue enr Detected i pituitary gland                         |
| O60814 | ENSG0000 HIST1H2BI | Supported | Tissue enr Detected i lymphoid tissue                         |
| O60882 | ENSG0000 MMP20     | NULL      | Tissue enh Detected i lymphoid tissue,testis                  |
| O75311 | ENSG0000 GLRA3     | NULL      | Group enr Detected i brain,breast,pituitary gland             |
| O75360 | ENSG0000 PROP1     | Enhanced  | Tissue enr Detected i pituitary gland                         |
| O75364 | ENSG0000 PITX3     | NULL      | Tissue enh Detected i skeletal muscle,tongue                  |
| O75409 | ENSG0000 HYPM      | Enhanced  | Tissue enr Detected i testis                                  |
| O75443 | ENSG0000 TECTA     | Approved  | Tissue enh Detected i brain                                   |
| O75603 | ENSG0000 GCM2      | NULL      | Tissue enr Detected i parathyroid gland                       |
| O75677 | ENSG0000 RFPL1     | NULL      | Tissue enr Detected i brain                                   |

|        |                    |           |                                                           |
|--------|--------------------|-----------|-----------------------------------------------------------|
| O75679 | ENSG0000 RFPL3     | NULL      | Tissue enr Detected i testis                              |
| O75715 | ENSG0000 GPX5      | NULL      | Tissue enr Detected i epididymis                          |
| O75838 | ENSG0000 CIB2      | Approved  | Tissue enh Detected i heart muscle,intestine              |
| O76001 | ENSG0000 OR2J3     | NULL      | Tissue enh Detected i testis                              |
| O94810 | ENSG0000 RGS11     | Uncertain | Tissue enh Detected i brain                               |
| O95045 | ENSG0000 UPP2      | NULL      | Group enr Detected i kidney,liver                         |
| O95076 | ENSG0000 ALX3      | NULL      | Tissue enh Detected i retina                              |
| O95231 | ENSG0000 VENTX     | Uncertain | Low tissue Detected i NULL                                |
| O95256 | ENSG0000 IL18RAP   | Enhanced  | Tissue enh Detected i blood,bone marrow,lymphoid tissue   |
| O95257 | ENSG0000 GADD45G   | Approved  | Tissue enh Detected i placenta                            |
| O95264 | ENSG0000 HTR3B     | Approved  | Tissue enh Detected i brain                               |
| O95389 | ENSG0000 WISP3     | NULL      | Tissue enh Detected i epididymis                          |
| O95399 | ENSG0000 UTS2      | Uncertain | Tissue enh Detected i blood,brain                         |
| O95411 | ENSG0000 TIAF1     | NULL      | Tissue enh Detected i brain                               |
| O95500 | ENSG0000 CLDN14    | NULL      | Group enr Detected i kidney,liver                         |
| O95561 | ENSG0000 C1orf105  | NULL      | Tissue enh Detected i heart muscle,testis                 |
| O95661 | ENSG0000 DIRAS3    | Approved  | Tissue enh Detected i brain,ovary,pituitary gland         |
| O95665 | ENSG0000 NTSR2     | NULL      | Tissue enr Detected i brain                               |
| O95800 | ENSG0000 GPR75     | NULL      | Tissue enh Detected i brain                               |
| O95843 | ENSG0000 GUCA1C    | Uncertain | Group enr Detected i heart muscle,pancreas,retina         |
| O95859 | ENSG0000 TSPAN12   | Uncertain | Low tissue Detected i NULL                                |
| O95868 | ENSG0000 LY6G6D    | Uncertain | Tissue enh Detected i seminal vesicle,skin 1              |
| O95932 | ENSG0000 TGM6      | Uncertain | Group enr Detected i lymphoid tissue,skin 1,tongue        |
| O95947 | ENSG0000 TBX6      | NULL      | Tissue enh Detected i esophagus,lymphoid tissue,pancreas  |
| O95992 | ENSG0000 CH25H     | NULL      | Tissue enh Detected i brain                               |
| O97980 | ENSG0000 HMHB1     | NULL      | Tissue enh Detected i blood,testis                        |
| P01270 | ENSG0000 PTH       | Enhanced  | Tissue enr Detected i parathyroid gland                   |
| P01286 | ENSG0000 GHRH      | NULL      | Tissue enr Detected i brain                               |
| P01566 | ENSG0000 IFNA10    | Uncertain | Not detect Not detect NULL                                |
| P01568 | ENSG0000 IFNA21    | Uncertain | Tissue enh Detected i blood,brain,lymphoid tissue         |
| P01571 | ENSG0000 IFNA17    | Uncertain | Not detect Not detect NULL                                |
| P01588 | ENSG0000 EPO       | Supported | Tissue enh Detected i cervix, uterine,endometrium 1,liver |
| P02708 | ENSG0000 CHRNA1    | Enhanced  | Tissue enr Detected i skeletal muscle                     |
| P03901 | ENSG0000 MT-ND4L   | NULL      | Tissue enh Detected i blood,skeletal muscle               |
| P04000 | ENSG0000 OPN1LW    | NULL      | Tissue enr Detected i retina                              |
| P04001 | ENSG0000 OPN1MW    | NULL      | Tissue enh Detected i lymphoid tissue                     |
| P04201 | ENSG0000 MAS1      | NULL      | Tissue enh Detected i brain,cervix, uterine               |
| P04553 | ENSG0000 PRM1      | Enhanced  | Tissue enr Detected i testis                              |
| P04908 | ENSG0000 HIST1H2AI | Supported | Tissue enr Detected i lymphoid tissue                     |
| P05112 | ENSG0000 IL4       | Approved  | Tissue enr Detected i blood                               |
| P05113 | ENSG0000 IL5       | Approved  | Tissue enh Detected i blood,testis                        |
| P06899 | ENSG0000 HIST1H2BJ | Supported | Tissue enr Detected i lymphoid tissue                     |
| P07510 | ENSG0000 CHRNG     | NULL      | Group enr Detected i epididymis,skeletal muscle           |
| P08588 | ENSG0000 ADRB1     | Enhanced  | Tissue enh Detected i heart muscle,placenta               |
| P08700 | ENSG0000 IL3       | NULL      | Tissue enh Detected i bone marrow,lymphoid tissue         |
| P08912 | ENSG0000 CHRM5     | Uncertain | Tissue enr Detected i brain                               |
| P09430 | ENSG0000 TNP1      | Enhanced  | Tissue enr Detected i testis                              |

|        |          |          |           |            |                                                        |
|--------|----------|----------|-----------|------------|--------------------------------------------------------|
| POC025 | ENSG0000 | NUDT17   | Approved  | Low tissue | Detected i NULL                                        |
| POC058 | ENSG0000 | HIST1H2A | Supported | Tissue enr | Detected i lymphoid tissue                             |
| POC5J1 | ENSG0000 | FAM86B2  | Uncertain | Tissue enr | Detected i fallopian tube                              |
| POC5Y9 | ENSG0000 | H2AFB1   | NULL      | Tissue enr | Detected i testis                                      |
| POC5Z0 | ENSG0000 | H2AFB2,H | NULL      | Tissue enr | Detected i intestine,pancreas,salivary gland,testis    |
| POC7H8 | ENSG0000 | KRTAP2-3 | Supported | Tissue enr | Detected i skin 1                                      |
| POC7M3 | ENSG0000 | SFTA3    | NULL      | Group enr  | Detected i lung,thyroid gland                          |
| POC7Q2 | ENSG0000 | ARMS2    | Enhanced  | Group enr  | Detected i placenta,testis                             |
| POC7T4 | ENSG0000 | HMSD     | NULL      | Tissue enr | Detected i brain                                       |
| POCE72 | ENSG0000 | OCM      | Uncertain | Tissue enr | Detected i blood,brain,lymphoid tissue                 |
| POCG37 | ENSG0000 | CFC1     | Uncertain | Group enr  | Detected i brain,pancreas,pituitary gland,prostate,sto |
| POCG47 | ENSG0000 | UBB      | Supported | Low tissue | Detected i NULL                                        |
| POCG48 | ENSG0000 | UBC      | Supported | Low tissue | Detected i NULL                                        |
| POCI25 | ENSG0000 | TRIM49   | NULL      | Tissue enr | Detected i blood,testis                                |
| POCL80 | ENSG0000 | GAGE12F  | Supported | Group enr  | Detected i blood,testis                                |
| POCL81 | ENSG0000 | GAGE12G  | Supported | Group enr  | Detected i blood,stomach 1                             |
| POCV98 | ENSG0000 | TSPY3    | Supported | Tissue enr | Detected i testis                                      |
| POCW20 | ENSG0000 | LIMS4    | Uncertain | Low tissue | Detected i NULL                                        |
| PODJD3 | ENSG0000 | RBMY1A1  | Supported | Tissue enr | Detected i testis                                      |
| PODJD7 | ENSG0000 | PGA4     | Supported | Tissue enr | Detected i stomach 1                                   |
| PODJD8 | ENSG0000 | PGA3     | Enhanced  | Tissue enr | Detected i stomach 1                                   |
| PODMC3 | ENSG0000 | APELA    | NULL      | Tissue enr | Detected i placenta,prostate                           |
| PODML2 | ENSG0000 | CSH1     | Enhanced  | Tissue enr | Detected i placenta                                    |
| PODML3 | ENSG0000 | CSH2     | Supported | Tissue enr | Detected i placenta                                    |
| PODMS8 | ENSG0000 | ADORA3   | NULL      | Group enr  | Detected i blood,brain                                 |
| PODN86 | ENSG0000 | CGB3,CGB | Enhanced, | Group enr  | Detected i pituitary gland,placenta                    |
| PODP57 | ENSG0000 | SLURP2   | NULL      | Tissue enr | Detected i esophagus,lymphoid tissue,tongue            |
| PODP91 | ENSG0000 | ERCC6    | NULL      | Low tissue | Detected i NULL                                        |
| PODPB3 | ENSG0000 | SCHIP1   | Uncertain | Group enr  | Detected i brain,heart muscle,skeletal muscle          |
| P10767 | ENSG0000 | FGF6     | NULL      | Group enr  | Detected i skeletal muscle,tongue                      |
| P10966 | ENSG0000 | CD8B     | Enhanced  | Group enr  | Detected i blood,lymphoid tissue                       |
| P10997 | ENSG0000 | IAPP     | Enhanced  | Tissue enr | Detected i pancreas                                    |
| P11230 | ENSG0000 | CHRNB1   | Approved  | Tissue enr | Detected i skeletal muscle,tongue                      |
| P12034 | ENSG0000 | FGF5     | NULL      | Tissue enr | Detected i brain                                       |
| P13236 | ENSG0000 | CCL4     | Approved  | Group enr  | Detected i blood,lung,lymphoid tissue                  |
| P13349 | ENSG0000 | MYF5     | NULL      | Group enr  | Detected i skeletal muscle,tongue                      |
| P13385 | ENSG0000 | TDGF1    | NULL      | Tissue enr | Detected i kidney,lymphoid tissue,ovary                |
| P13725 | ENSG0000 | OSM      | NULL      | Tissue enr | Detected i blood,bone marrow                           |
| P13945 | ENSG0000 | ADRB3    | Uncertain | Tissue enr | Detected i gallbladder,ovary,smooth muscle             |
| P14416 | ENSG0000 | DRD2     | Supported | Group enr  | Detected i adrenal gland,brain,pituitary gland         |
| P14616 | ENSG0000 | INSRR    | Uncertain | Tissue enr | Detected i adrenal gland,brain,kidney                  |
| P14653 | ENSG0000 | HOXB1    | Uncertain | Tissue enr | Detected i esophagus,testis,urinary bladder            |
| P15172 | ENSG0000 | MYOD1    | NULL      | Tissue enr | Detected i skeletal muscle                             |
| P15382 | ENSG0000 | KCNE1    | NULL      | Tissue enr | Detected i fallopian tube                              |
| P20671 | ENSG0000 | HIST1H2A | Supported | Tissue enr | Detected i lymphoid tissue                             |
| P21145 | ENSG0000 | MAL      | NULL      | Tissue enr | Detected i esophagus                                   |
| P21452 | ENSG0000 | TACR2    | NULL      | Tissue enr | Detected i intestine,smooth muscle                     |

|        |                    |                      |                                                        |
|--------|--------------------|----------------------|--------------------------------------------------------|
| P21918 | ENSG0000 DRD5      | Supported Group enr  | Detected i brain,lymphoid tissue,stomach 1             |
| P22888 | ENSG0000 LHCGR     | Uncertain Tissue enr | Detected i brain,testis                                |
| P23409 | ENSG0000 MYF6      | NULL Tissue enr      | Detected i skeletal muscle                             |
| P23415 | ENSG0000 GLRA1     | Uncertain Tissue enr | Detected i brain                                       |
| P23416 | ENSG0000 GLRA2     | Approved Group enr   | Detected i brain,intestine                             |
| P23527 | ENSG0000 HIST1H2B1 | Supported Tissue enr | Detected i lymphoid tissue                             |
| P23945 | ENSG0000 FSHR      | NULL Tissue enr      | Detected i gallbladder,ovary,testis                    |
| P24903 | ENSG0000 CYP2F1    | NULL Tissue enr      | Detected i lung,lymphoid tissue,pituitary gland,testis |
| P25100 | ENSG0000 ADRA1D    | Uncertain Tissue enr | Detected i brain                                       |
| P26371 | ENSG0000 KRTAP5-9  | NULL Tissue enr      | Detected i epididymis,testis,urinary bladder           |
| P26441 | ENSG0000 CNTF      | Approved Tissue enr  | Detected i brain                                       |
| P26717 | ENSG0000 KLRC2     | NULL Tissue enr      | Detected i blood,brain                                 |
| P27539 | ENSG0000 GDF1      | NULL Group enr       | Detected i brain,skeletal muscle                       |
| P28221 | ENSG0000 HTR1D     | NULL Tissue enr      | Detected i brain,intestine                             |
| P28335 | ENSG0000 HTR2C     | NULL Tissue enr      | Detected i brain                                       |
| P28336 | ENSG0000 NMBR      | NULL Group enr       | Detected i brain,fallopian tube,testis                 |
| P28566 | ENSG0000 HTR1E     | Approved Tissue enr  | Detected i brain,ovary                                 |
| P29371 | ENSG0000 TACR3     | Uncertain Tissue enr | Detected i brain,urinary bladder                       |
| P30301 | ENSG0000 MIP       | Supported Tissue enr | Detected i liver,retina,testis                         |
| P30926 | ENSG0000 CHRN4     | NULL Group enr       | Detected i adrenal gland,lymphoid tissue,retina,testis |
| P30968 | ENSG0000 GNRHR     | Enhanced Tissue enr  | Detected i pituitary gland                             |
| P31358 | ENSG0000 CD52      | NULL Group enr       | Detected i blood,epididymis                            |
| P32245 | ENSG0000 MC4R      | Uncertain Tissue enr | Detected i brain,fallopian tube                        |
| P32247 | ENSG0000 BRS3      | NULL Tissue enr      | Detected i epididymis                                  |
| P32745 | ENSG0000 SSTR3     | Approved Tissue enr  | Detected i brain,lymphoid tissue,testis                |
| P33032 | ENSG0000 MC5R      | Approved Tissue enr  | Detected i epididymis,esophagus                        |
| P33763 | ENSG0000 S100A5    | NULL Tissue enr      | Detected i blood,thyroid gland                         |
| P33778 | ENSG0000 HIST1H2B1 | Supported Tissue enr | Detected i lymphoid tissue                             |
| P34130 | ENSG0000 NTF4      | NULL Tissue enr      | Detected i skin 1                                      |
| P34969 | ENSG0000 HTR7      | Approved Tissue enr  | Detected i parathyroid gland,testis                    |
| P34981 | ENSG0000 TRHR      | Approved Group enr   | Detected i brain,pituitary gland,thyroid gland         |
| P34982 | ENSG0000 OR1D2     | NULL Low tissue      | Detected i NULL                                        |
| P35125 | ENSG0000 USP6      | NULL Group enr       | Detected i skeletal muscle,testis                      |
| P35212 | ENSG0000 GJA4      | Approved Low tissue  | Detected i NULL                                        |
| P35452 | ENSG0000 HOXD12    | Uncertain Tissue enr | Detected i brain,intestine,seminal vesicle,vagina      |
| P35462 | ENSG0000 DRD3      | NULL Tissue enr      | Detected i blood,brain,testis                          |
| P35523 | ENSG0000 CLCN1     | NULL Group enr       | Detected i skeletal muscle,tongue                      |
| P36544 | ENSG0000 CHRNA7    | Enhanced Tissue enr  | Detected i intestine                                   |
| P39877 | ENSG0000 PLA2G5    | Approved Tissue enr  | Detected i heart muscle,retina                         |
| P39905 | ENSG0000 GDNF      | Supported Tissue enr | Detected i brain,skeletal muscle                       |
| P40933 | ENSG0000 IL15      | Approved Low tissue  | Detected i NULL                                        |
| P41143 | ENSG0000 OPRD1     | Approved Tissue enr  | Detected i brain                                       |
| P41146 | ENSG0000 OPRL1     | NULL Tissue enr      | Detected i blood,brain                                 |
| P41238 | ENSG0000 APOBEC1   | NULL Tissue enr      | Detected i intestine                                   |
| P41595 | ENSG0000 HTR2B     | Enhanced Tissue enr  | Detected i placenta                                    |
| P41968 | ENSG0000 MC3R      | Uncertain Tissue enr | Detected i brain                                       |
| P43026 | ENSG0000 GDF5      | Uncertain Tissue enr | Detected i salivary gland                              |

|        |                  |           |                                                                     |
|--------|------------------|-----------|---------------------------------------------------------------------|
| P43088 | ENSG0000 PTGFR   | NULL      | Low tissue Detected i NULL                                          |
| P43220 | ENSG0000 GLP1R   | NULL      | Tissue enh Detected i pancreas                                      |
| P43626 | ENSG0000 KIR2DL1 | NULL      | Tissue enh Detected i endometrium 1,lung,lymphoid tissue            |
| P43628 | ENSG0000 KIR2DL3 | NULL      | Tissue enh Detected i lung,lymphoid tissue                          |
| P46089 | ENSG0000 GPR3    | Uncertain | Tissue enh Detected i brain                                         |
| P46091 | ENSG0000 GPR1    | Uncertain | Tissue enh Detected i placenta                                      |
| P46094 | ENSG0000 XCR1    | Uncertain | Tissue enh Detected i lymphoid tissue                               |
| P46095 | ENSG0000 GPR6    | NULL      | Tissue enr Detected i brain                                         |
| P46098 | ENSG0000 HTR3A   | Supported | Tissue enh Detected i blood,lymphoid tissue,salivary gland          |
| P46597 | ENSG0000 ASMT    | NULL      | Tissue enh Detected i brain,epididymis                              |
| P46663 | ENSG0000 BDKRB1  | Approved  | Tissue enh Detected i gallbladder,lymphoid tissue                   |
| P47211 | ENSG0000 GALR1   | NULL      | Tissue enh Detected i adrenal gland,brain,pituitary gland           |
| P47775 | ENSG0000 GPR12   | Uncertain | Group enr Detected i brain,salivary gland                           |
| P47872 | ENSG0000 SCTR    | Uncertain | Group enr Detected i intestine,pancreas                             |
| P47992 | ENSG0000 XCL1    | Approved  | Group enr Detected i blood,lymphoid tissue                          |
| P48039 | ENSG0000 MTNR1A  | NULL      | Tissue enh Detected i brain,intestine,kidney,testis                 |
| P48145 | ENSG0000 NPBWR1  | NULL      | Tissue enh Detected i blood,brain,liver                             |
| P48146 | ENSG0000 NPBWR2  | NULL      | Tissue enr Detected i brain                                         |
| P48165 | ENSG0000 GJA8    | Enhanced  | Tissue enr Detected i testis                                        |
| P48546 | ENSG0000 GIPR    | Uncertain | Tissue enh Detected i brain,stomach 1                               |
| P49019 | ENSG0000 HCAR3   | Approved  | Tissue enh Detected i blood                                         |
| P49286 | ENSG0000 MTNR1B  | Supported | Tissue enh Detected i brain,lymphoid tissue,placenta,testis         |
| P49335 | ENSG0000 POU3F4  | NULL      | Tissue enr Detected i brain                                         |
| P49683 | ENSG0000 PRLHR   | Enhanced  | Tissue enh Detected i adrenal gland,brain,cervix, uterine,pituitary |
| P50052 | ENSG0000 AGTR2   | NULL      | Tissue enh Detected i endometrium 1,lung,smooth muscle              |
| P50406 | ENSG0000 HTR6    | Uncertain | Tissue enr Detected i brain                                         |
| P50553 | ENSG0000 ASCL1   | Enhanced  | Tissue enh Detected i brain,liver,pituitary gland                   |
| P51582 | ENSG0000 P2RY4   | Uncertain | Tissue enr Detected i intestine                                     |
| P51671 | ENSG0000 CCL11   | NULL      | Tissue enh Detected i heart muscle,intestine,lymphoid tissue        |
| P51677 | ENSG0000 CCR3    | Uncertain | Tissue enr Detected i blood                                         |
| P51685 | ENSG0000 CCR8    | Enhanced  | Group enr Detected i blood,lymphoid tissue,urinary bladder          |
| P51686 | ENSG0000 CCR9    | Uncertain | Tissue enr Detected i lymphoid tissue                               |
| P51861 | ENSG0000 CDR1    | NULL      | Tissue enr Detected i brain                                         |
| P52744 | ENSG0000 ZNF138  | NULL      | Tissue enh Detected i brain                                         |
| P54257 | ENSG0000 HAP1    | Enhanced  | Tissue enh Detected i brain,stomach 1                               |
| P54845 | ENSG0000 NRL     | Enhanced  | Tissue enr Detected i retina                                        |
| P55075 | ENSG0000 FGF8    | NULL      | Tissue enr Detected i skeletal muscle                               |
| P55089 | ENSG0000 UCN     | Approved  | Tissue enh Detected i skeletal muscle                               |
| P55318 | ENSG0000 FOXA3   | Uncertain | Tissue enh Detected i liver,pancreas                                |
| P55344 | ENSG0000 LIM2    | NULL      | Tissue enr Detected i blood                                         |
| P55895 | ENSG0000 RAG2    | NULL      | Tissue enr Detected i lymphoid tissue                               |
| P55916 | ENSG0000 UCP3    | Enhanced  | Tissue enr Detected i skeletal muscle                               |
| P56696 | ENSG0000 KCNQ4   | Uncertain | Tissue enh Detected i pancreas,retina                               |
| P57059 | ENSG0000 SIK1    | Approved  | Tissue enh Detected i skin 1                                        |
| P58294 | ENSG0000 PROK1   | NULL      | Group enr Detected i ovary,testis                                   |
| P58400 | ENSG0000 NRXN1   | NULL      | Tissue enr Detected i brain                                         |
| P58418 | ENSG0000 CLRN1   | Uncertain | Group enr Detected i adrenal gland,retina                           |

|        |                    |           |            |                                                       |
|--------|--------------------|-----------|------------|-------------------------------------------------------|
| P59046 | ENSG0000 NLRP12    | Approved  | Group enr  | Detected i blood,bone marrow,lung,lymphoid tissue     |
| P59095 | ENSG0000 STARD6    | NULL      | Tissue enr | Detected i testis                                     |
| P59103 | ENSG0000 DAOA      | Uncertain | Not detect | Not detect NULL                                       |
| P60153 | ENSG0000 RNASE9    | NULL      | Tissue enr | Detected i epididymis                                 |
| P60328 | ENSG0000 KRTAP12-3 | NULL      | Group enr  | Detected i blood,skin 1                               |
| P60329 | ENSG0000 KRTAP12-4 | NULL      | Group enr  | Detected i skin 1,testis                              |
| P60370 | ENSG0000 KRTAP10-5 | NULL      | Tissue enr | Detected i skin 1                                     |
| P60372 | ENSG0000 KRTAP10-6 | NULL      | Tissue enr | Detected i skin 1                                     |
| P60409 | ENSG0000 KRTAP10-7 | NULL      | Not detect | Not detect NULL                                       |
| P60410 | ENSG0000 KRTAP10-8 | NULL      | Tissue enr | Detected i skin 1                                     |
| P60411 | ENSG0000 KRTAP10-9 | NULL      | Tissue enr | Detected i skin 1                                     |
| P60893 | ENSG0000 GPR85     | NULL      | Group enr  | Detected i brain,skeletal muscle                      |
| P61366 | ENSG0000 OSTN      | Uncertain | Tissue enh | Detected i blood,brain,prostate                       |
| P62502 | ENSG0000 LCN6      | NULL      | Tissue enr | Detected i epididymis                                 |
| P62807 | ENSG0000 HIST1H2B1 | Supported | Group enr  | Detected i blood,lymphoid tissue                      |
| P62945 | ENSG0000 RPL41     | Approved  | Low tissue | Detected i NULL                                       |
| P62952 | ENSG0000 BLCAP     | NULL      | Tissue enh | Detected i skeletal muscle                            |
| P78424 | ENSG0000 POU6F2    | NULL      | Tissue enh | Detected i brain,pancreas                             |
| P81277 | ENSG0000 PRLH      | Approved  | Tissue enh | Detected i brain,heart muscle                         |
| P81534 | ENSG0000 DEFB103A  | NULL      | Tissue enh | Detected i cervix, uterine,lymphoid tissue,tongue,vag |
| P82251 | ENSG0000 SLC7A9    | Enhanced  | Group enr  | Detected i intestine,kidney                           |
| P83881 | ENSG0000 RPL36A    | Uncertain | Low tissue | Detected i NULL                                       |
| P86478 | ENSG0000 PRR20E    | Uncertain | Tissue enr | Detected i testis                                     |
| P86479 | ENSG0000 PRR20C    | Uncertain | Tissue enr | Detected i testis                                     |
| P86480 | ENSG0000 PRR20D    | Uncertain | Tissue enr | Detected i testis                                     |
| Q00LT1 | ENSG0000 PRCD      | NULL      | Tissue enr | Detected i retina                                     |
| Q01453 | ENSG0000 PMP22     | NULL      | Low tissue | Detected i NULL                                       |
| Q01718 | ENSG0000 MC2R      | Enhanced  | Group enr  | Detected i adrenal gland,pituitary gland              |
| Q01726 | ENSG0000 MC1R      | NULL      | Low tissue | Detected i NULL                                       |
| Q02577 | ENSG0000 NHLH2     | Uncertain | Group enr  | Detected i brain,skin 1                               |
| Q02643 | ENSG0000 GHRHR     | NULL      | Tissue enr | Detected i pituitary gland                            |
| Q04844 | ENSG0000 CHRNE     | NULL      | Group enr  | Detected i heart muscle,pituitary gland               |
| Q05066 | ENSG0000 SRY       | NULL      | Group enr  | Detected i esophagus,lymphoid tissue,skin 1,testis    |
| Q05952 | ENSG0000 TNP2      | NULL      | Tissue enr | Detected i testis                                     |
| Q07001 | ENSG0000 CHRND     | NULL      | Tissue enr | Detected i skeletal muscle                            |
| Q07326 | ENSG0000 PIGF      | Uncertain | Low tissue | Detected i NULL                                       |
| Q07627 | ENSG0000 KRTAP1-1  | NULL      | Tissue enr | Detected i skin 1                                     |
| Q09MP3 | ENSG0000 RAD51AP2  | NULL      | Tissue enr | Detected i testis                                     |
| Q0D2K3 | ENSG0000 RIPPLY1   | Uncertain | Tissue enh | Detected i kidney,liver                               |
| Q0P5P2 | ENSG0000 C17orf67  | Uncertain | Tissue enh | Detected i vagina                                     |
| Q0VD86 | ENSG0000 INCA1     | Uncertain | Tissue enr | Detected i testis                                     |
| Q0VG99 | ENSG0000 MESP2     | NULL      | Low tissue | Detected i NULL                                       |
| Q0WX57 | ENSG0000 USP17L24  | Uncertain | Not detect | Not detect NULL                                       |
| Q11203 | ENSG0000 ST3GAL3   | Uncertain | Tissue enh | Detected i skeletal muscle                            |
| Q12908 | ENSG0000 SLC10A2   | Approved  | Tissue enr | Detected i intestine                                  |
| Q13007 | ENSG0000 IL24      | Uncertain | Tissue enh | Detected i blood,lymphoid tissue                      |
| Q13117 | ENSG0000 DAZ2      | Approved  | Group enr  | Detected i stomach 1,testis                           |

|        |                    |           |                                                                   |
|--------|--------------------|-----------|-------------------------------------------------------------------|
| Q13324 | ENSG0000 CRHR2     | NULL      | Tissue enh Detected i brain                                       |
| Q13349 | ENSG0000 ITGAD     | Uncertain | Tissue enr Detected i lymphoid tissue                             |
| Q13360 | ENSG0000 ZNF177    | Uncertain | Tissue enh Detected i testis                                      |
| Q13461 | ENSG0000 FOXE3     | NULL      | Group enr Detected i brain,lymphoid tissue,testis                 |
| Q13639 | ENSG0000 HTR4      | Enhanced  | Group enr Detected i brain,heart muscle,intestine,pituitary glanc |
| Q13702 | ENSG0000 RAPSIN    | Approved  | Group enr Detected i skeletal muscle,tongue                       |
| Q13765 | ENSG0000 NACA      | NULL      | Low tissue Detected i NULL                                        |
| Q13956 | ENSG0000 PDE6H     | Supported | Tissue enr Detected i retina                                      |
| Q14500 | ENSG0000 KCNJ12    | Approved  | Group enr Detected i brain,skeletal muscle                        |
| Q14626 | ENSG0000 IL11RA    | Supported | Low tissue Detected i NULL                                        |
| Q14916 | ENSG0000 SLC17A1   | NULL      | Group enr Detected i kidney,liver                                 |
| Q14994 | ENSG0000 NR1I3     | NULL      | Tissue enr Detected i liver                                       |
| Q14D33 | ENSG0000 RTP5      | Enhanced  | Tissue enr Detected i brain                                       |
| Q15319 | ENSG0000 POU4F3    | Uncertain | Tissue enh Detected i brain                                       |
| Q15415 | ENSG0000 RBMY1F,R  | Supported | Tissue enr Detected i testis                                      |
| Q15466 | ENSG0000 NR0B2     | NULL      | Tissue enh Detected i intestine,liver,pancreas                    |
| Q15822 | ENSG0000 CHRNA2    | NULL      | Group enr Detected i brain,prostate                               |
| Q15825 | ENSG0000 CHRNA6    | NULL      | Tissue enh Detected i brain,retina                                |
| Q16559 | ENSG0000 TAL2      | Uncertain | Group enr Detected i blood,kidney,skeletal muscle                 |
| Q16613 | ENSG0000 AANAT     | NULL      | Group enr Detected i retina,testis                                |
| Q16671 | ENSG0000 AMHR2     | NULL      | Tissue enh Detected i adrenal gland,ovary,testis                  |
| Q16778 | ENSG0000 HIST2H2BI | Supported | Tissue enh Detected i lymphoid tissue                             |
| Q17RF5 | ENSG0000 ODAPH     | NULL      | Group enr Detected i blood,placenta                               |
| Q1MX18 | ENSG0000 INSC      | Enhanced  | Low tissue Detected i NULL                                        |
| Q2I0M5 | ENSG0000 RSPO4     | Uncertain | Tissue enh Detected i brain,lung                                  |
| Q2M2E3 | ENSG0000 ODF4      | Enhanced  | Tissue enr Detected i testis                                      |
| Q2M3T9 | ENSG0000 HYAL4     | Uncertain | Tissue enh Detected i placenta,skeletal muscle                    |
| Q2NL67 | ENSG0000 PARP6     | Approved  | Low tissue Detected i NULL                                        |
| Q2WEN9 | ENSG0000 CEACAM1   | Uncertain | Tissue enh Detected i lymphoid tissue,pancreas                    |
| Q2W6J6 | ENSG0000 KLHL38    | Uncertain | Tissue enr Detected i skeletal muscle                             |
| Q30KQ6 | ENSG0000 DEFB114   | NULL      | Tissue enr Detected i epididymis                                  |
| Q3B8N2 | ENSG0000 LGALS9B   | Approved  | Tissue enh Detected i blood,esophagus,stomach 1                   |
| Q3KNW5 | ENSG0000 SLC10A6   | Enhanced  | Tissue enh Detected i adipose tissue,breast,skin 1                |
| Q3KP44 | ENSG0000 ANKRD55   | Uncertain | Group enr Detected i blood,brain,liver,lymphoid tissue,testis     |
| Q3LFD5 | ENSG0000 USP41     | NULL      | Low tissue Detected i NULL                                        |
| Q3LI64 | ENSG0000 KRTAP6-1  | NULL      | Tissue enr Detected i skin 1                                      |
| Q3LI66 | ENSG0000 KRTAP6-2  | NULL      | Not detect Not detect NULL                                        |
| Q3LI76 | ENSG0000 KRTAP15-  | NULL      | Not detect Not detect NULL                                        |
| Q3MUY2 | ENSG0000 PIGY      | Uncertain | Group enr Detected i blood,intestine                              |
| Q3SY46 | ENSG0000 KRTAP13-  | NULL      | Not detect Not detect NULL                                        |
| Q3SYB3 | ENSG0000 FOXD4L6   | Uncertain | Group enr Detected i brain,lymphoid tissue                        |
| Q3SYF9 | ENSG0000 KRTAP19-  | NULL      | Tissue enr Detected i skin 1                                      |
| Q401N2 | ENSG0000 ZACN      | NULL      | Tissue enh Detected i intestine                                   |
| Q494R4 | ENSG0000 CCDC153   | Uncertain | Tissue enh Detected i blood,fallopian tube,pituitary gland        |
| Q494W8 | ENSG0000 CHRFBAM7  | NULL      | Tissue enh Detected i bone marrow,parathyroid gland               |
| Q495M9 | ENSG0000 USH1G     | Uncertain | Tissue enh Detected i brain,epididymis,esophagus                  |
| Q495Y8 | ENSG0000 SPDYE2    | Approved  | Tissue enh Detected i testis                                      |

|        |                   |           |                                                                  |
|--------|-------------------|-----------|------------------------------------------------------------------|
| Q4JDL3 | ENSG0000 PTPN20   | Enhanced  | Tissue enh Detected i testis                                     |
| Q4VC12 | ENSG0000 MSS51    | NULL      | Group enr Detected i parathyroid gland,skeletal muscle           |
| Q504Y3 | ENSG0000 ZCWPW2   | Uncertain | Low tissue Detected i NULL                                       |
| Q538Z0 | ENSG0000 LUZP6    | NULL      | Low tissue Detected i NULL                                       |
| Q56P42 | ENSG0000 PYDC2    | Uncertain | Group enr Detected i fallopian tube,testis                       |
| Q56UN5 | ENSG0000 MAP3K19  | NULL      | Tissue enh Detected i brain,fallopian tube                       |
| Q58HT5 | ENSG0000 AWAT1    | Enhanced  | Group enr Detected i breast,skin 1                               |
| Q5DT21 | ENSG0000 SPINK9   | Uncertain | Tissue enr Detected i tongue                                     |
| Q5H9J7 | ENSG0000 BEX5     | Enhanced  | Tissue enh Detected i brain                                      |
| Q5I7T1 | ENSG0000 ALG10B   | Approved  | Low tissue Detected i NULL                                       |
| Q5J5C9 | ENSG0000 DEFB121  | NULL      | Tissue enr Detected i epididymis                                 |
| Q5JUK9 | ENSG0000 PAGE3    | Uncertain | Tissue enr Detected i testis                                     |
| Q5MJ10 | ENSG0000 SPANXN2  | NULL      | Tissue enr Detected i testis                                     |
| Q5MJ68 | ENSG0000 SPDYC    | Uncertain | Group enr Detected i liver,testis                                |
| Q5MJ70 | ENSG0000 SPDYA    | Enhanced  | Tissue enr Detected i testis                                     |
| Q5NUL3 | ENSG0000 FFAR4    | NULL      | Group enr Detected i intestine,lung,pituitary gland              |
| Q5QGT7 | ENSG0000 RTP2     | NULL      | Group enr Detected i skeletal muscle,testis                      |
| Q5QJU3 | ENSG0000 ACER2    | NULL      | Tissue enh Detected i stomach 1,urinary bladder,vagina           |
| Q5SQQ9 | ENSG0000 VAX1     | Uncertain | Tissue enr Detected i brain                                      |
| Q5SRR4 | ENSG0000 LY6G5C   | Approved  | Tissue enh Detected i brain                                      |
| Q5SWW7 | ENSG0000 C10orf55 | Approved  | Tissue enr Detected i testis                                     |
| Q5SY68 | ENSG0000 S100A7L2 | Uncertain | Tissue enr Detected i testis                                     |
| Q5T0L3 | ENSG0000 SPATA46  | NULL      | Tissue enr Detected i testis                                     |
| Q5T197 | ENSG0000 DCST1    | Uncertain | Group enr Detected i retina,skin 1,testis                        |
| Q5T1H1 | ENSG0000 EYS      | NULL      | Tissue enr Detected i retina                                     |
| Q5T215 | ENSG0000 TRAPPC3L | NULL      | Tissue enh Detected i lymphoid tissue,placenta                   |
| Q5T4T1 | ENSG0000 TMEM170  | Uncertain | Tissue enh Detected i bone marrow                                |
| Q5T4W7 | ENSG0000 ARTN     | NULL      | Tissue enh Detected i parathyroid gland                          |
| Q5T5A8 | ENSG0000 LCE3C    | NULL      | Group enr Detected i lymphoid tissue,tongue                      |
| Q5T6X5 | ENSG0000 GPRC6A   | NULL      | Group enr Detected i adrenal gland,kidney,prostate,salivary glan |
| Q5T752 | ENSG0000 LCE1D    | NULL      | Tissue enr Detected i skin 1                                     |
| Q5T753 | ENSG0000 LCE1E    | NULL      | Tissue enr Detected i skin 1                                     |
| Q5T764 | ENSG0000 IFIT1B   | Approved  | Group enr Detected i bone marrow,placenta                        |
| Q5T7M4 | ENSG0000 C1QTNF12 | Uncertain | Tissue enh Detected i intestine,skin 1                           |
| Q5T7P3 | ENSG0000 LCE1B    | NULL      | Tissue enr Detected i skin 1                                     |
| Q5TA77 | ENSG0000 LCE3B    | NULL      | Tissue enr Detected i lymphoid tissue                            |
| Q5TA78 | ENSG0000 LCE4A    | NULL      | Tissue enr Detected i skin 1                                     |
| Q5TA81 | ENSG0000 LCE2C    | NULL      | Tissue enr Detected i skin 1                                     |
| Q5TAB7 | ENSG0000 RIPPLY2  | Uncertain | Tissue enh Detected i brain                                      |
| Q5TCM9 | ENSG0000 LCE5A    | NULL      | Tissue enr Detected i skin 1                                     |
| Q5TGI4 | ENSG0000 SAMD5    | Uncertain | Low tissue Detected i NULL                                       |
| Q5TGU0 | ENSG0000 TSPO2    | NULL      | Tissue enr Detected i bone marrow                                |
| Q5TIA1 | ENSG0000 MEI1     | Approved  | Tissue enh Detected i blood,lymphoid tissue,testis               |
| Q5TIE3 | ENSG0000 VWA5B1   | Enhanced  | Tissue enh Detected i brain,epididymis,testis                    |
| Q5TYM5 | ENSG0000 FAM72A   | Uncertain | Low tissue Detected i NULL                                       |
| Q5VT99 | ENSG0000 LRRC38   | Approved  | Tissue enh Detected i adrenal gland,skeletal muscle              |
| Q5VVX9 | ENSG0000 UBE2U    | NULL      | Tissue enr Detected i testis                                     |

|        |          |          |           |            |                                                      |
|--------|----------|----------|-----------|------------|------------------------------------------------------|
| Q5VVY1 | ENSG0000 | METTL11B | Uncertain | Group enr  | Detected i heart muscle,skeletal muscle              |
| Q5VVK5 | ENSG0000 | IL23R    | Uncertain | Tissue enh | Detected i blood,lymphoid tissue                     |
| Q5VY80 | ENSG0000 | RAET1L   | NULL      | Tissue enh | Detected i esophagus,lymphoid tissue,tongue          |
| Q5XKR4 | ENSG0000 | OTP      | Enhanced  | Tissue enr | Detected i brain                                     |
| Q6A555 | ENSG0000 | TXNDC8   | NULL      | Tissue enr | Detected i testis                                    |
| Q6B811 | ENSG0000 | DUSP13   | NULL      | Tissue enh | Detected i skeletal muscle,testis,tongue             |
| Q6DHY5 | ENSG0000 | TBC1D3G  | Supported | Tissue enr | Detected i testis                                    |
| Q6DKI2 | ENSG0000 | LGALS9C  | Approved  | Tissue enh | Detected i blood,esophagus,intestine,lymphoid tissue |
| Q6E213 | ENSG0000 | AWAT2    | Approved  | Group enr  | Detected i breast,skin 1                             |
| Q6EIG7 | ENSG0000 | CLEC6A   | NULL      | Group enr  | Detected i blood,heart muscle,lung,lymphoid tissue   |
| Q6EKJ0 | ENSG0000 | GTF2IRD2 | NULL      | Low tissue | Detected i NULL                                      |
| Q6FI13 | ENSG0000 | HIST2H2A | Supported | Group enr  | Detected i blood,bone marrow,lymphoid tissue         |
| Q6ISU1 | ENSG0000 | PTCRA    | NULL      | Group enr  | Detected i blood,lymphoid tissue                     |
| Q6JVE6 | ENSG0000 | LCN10    | Approved  | Tissue enh | Detected i epididymis                                |
| Q6L8G4 | ENSG0000 | KRTAP5-1 | NULL      | Tissue enr | Detected i skin 1                                    |
| Q6L8G9 | ENSG0000 | KRTAP5-6 | NULL      | Group enr  | Detected i liver,placenta,skin 1                     |
| Q6L8H2 | ENSG0000 | KRTAP5-3 | NULL      | Tissue enr | Detected i skin 1                                    |
| Q6NSX1 | ENSG0000 | CCDC70   | NULL      | Tissue enr | Detected i testis                                    |
| Q6NXP2 | ENSG0000 | FAM71F2  | Enhanced  | Tissue enr | Detected i testis                                    |
| Q6PF15 | ENSG0000 | KLHL35   | Enhanced  | Tissue enh | Detected i brain,testis                              |
| Q6PI25 | ENSG0000 | CNIH2    | NULL      | Tissue enr | Detected i brain                                     |
| Q6PIU1 | ENSG0000 | KCNV1    | NULL      | Tissue enr | Detected i brain                                     |
| Q6PIV2 | ENSG0000 | FOXR1    | NULL      | Tissue enr | Detected i testis                                    |
| Q6PRD7 | ENSG0000 | CEMP1    | Approved  | Low tissue | Detected i NULL                                      |
| Q6PXP3 | ENSG0000 | SLC2A7   | Uncertain | Tissue enr | Detected i intestine                                 |
| Q6QHK4 | ENSG0000 | FIGLA    | Supported | Tissue enh | Detected i blood,pancreas,testis                     |
| Q6R6M4 | ENSG0000 | USP17L2  | Uncertain | Low tissue | Detected i NULL                                      |
| Q6RSH7 | ENSG0000 | VHLL     | NULL      | Tissue enh | Detected i brain,pancreas,skeletal muscle            |
| Q6RVD6 | ENSG0000 | SPATA8   | NULL      | Tissue enr | Detected i testis                                    |
| Q6S545 | ENSG0000 | POTEH    | NULL      | Group enr  | Detected i prostate,testis                           |
| Q6SJ96 | ENSG0000 | TBPL2    | Uncertain | Tissue enh | Detected i skeletal muscle                           |
| Q6TCH4 | ENSG0000 | PAQR6    | NULL      | Tissue enr | Detected i brain                                     |
| Q6U736 | ENSG0000 | OPN5     | Supported | Tissue enr | Detected i testis                                    |
| Q6UVW9 | ENSG0000 | CLEC2A   | Approved  | Tissue enr | Detected i skin 1                                    |
| Q6UWJ8 | ENSG0000 | CD164L2  | Enhanced  | Tissue enh | Detected i fallopian tube                            |
| Q6UWM7 | ENSG0000 | LCTL     | NULL      | Tissue enh | Detected i brain                                     |
| Q6UWW9 | ENSG0000 | TMEM207  | Uncertain | Tissue enr | Detected i kidney                                    |
| Q6UX39 | ENSG0000 | AMTN     | Uncertain | Group enr  | Detected i lymphoid tissue,salivary gland,stomach 1  |
| Q6UX52 | ENSG0000 | C17orf99 | Uncertain | Tissue enr | Detected i bone marrow                               |
| Q6UXB1 | ENSG0000 | IGFL3    | Uncertain | Tissue enr | Detected i skin 1                                    |
| Q6UXL0 | ENSG0000 | IL20RB   | NULL      | Tissue enh | Detected i esophagus,skin 1                          |
| Q6UXT8 | ENSG0000 | ALKAL1   | Uncertain | Tissue enh | Detected i gallbladder,prostate,urinary bladder      |
| Q6UXV0 | ENSG0000 | GFRAL    | Uncertain | Tissue enh | Detected i adipose tissue,blood,liver                |
| Q6UXZ3 | ENSG0000 | CD300LD  | Uncertain | Tissue enh | Detected i blood,bone marrow                         |
| Q6V0L0 | ENSG0000 | CYP26C1  | NULL      | Tissue enh | Detected i adrenal gland,lymphoid tissue,testis      |
| Q6W5P4 | ENSG0000 | NPSR1    | NULL      | Tissue enh | Detected i brain,retina,stomach 1                    |
| Q6XD76 | ENSG0000 | ASCL4    | Uncertain | Tissue enh | Detected i blood,parathyroid gland                   |

|        |                   |           |                                                                  |
|--------|-------------------|-----------|------------------------------------------------------------------|
| Q6XPS3 | ENSG0000 TPTE2    | NULL      | Tissue enr Detected i testis                                     |
| Q6YFQ2 | ENSG0000 COX6B2   | NULL      | Tissue enr Detected i testis                                     |
| Q6ZNS7 | ENSG0000 ZFP2     | Uncertain | Low tissue Detected i NULL                                       |
| Q6ZNE9 | ENSG0000 RUFY4    | Uncertain | Tissue enh Detected i lung,lymphoid tissue                       |
| Q6ZNG9 | ENSG0000 KRBA2    | Approved  | Low tissue Detected i NULL                                       |
| Q6ZPD8 | ENSG0000 DGAT2L6  | NULL      | Group enr Detected i breast,skin 1                               |
| Q6ZQW0 | ENSG0000 IDO2     | NULL      | Group enr Detected i liver,placenta                              |
| Q6ZQY3 | ENSG0000 GADL1    | Uncertain | Tissue enr Detected i skeletal muscle                            |
| Q6ZSA7 | ENSG0000 LRRC55   | Uncertain | Group enr Detected i brain,lymphoid tissue                       |
| Q6ZSG1 | ENSG0000 RNF165   | Uncertain | Tissue enh Detected i brain                                      |
| Q6ZT89 | ENSG0000 SLC25A48 | Uncertain | Tissue enh Detected i brain,kidney,skeletal muscle               |
| Q6ZUT3 | ENSG0000 FRMD7    | Uncertain | Group enr Detected i endometrium 1,kidney,smooth muscle          |
| Q701N4 | ENSG0000 KRTAP5-2 | NULL      | Group enr Detected i brain,pancreas,skin 1                       |
| Q70Z44 | ENSG0000 HTR3D    | NULL      | Not detect Not detect NULL                                       |
| Q71U36 | ENSG0000 TUBA1A   | Enhanced  | Tissue enh Detected i brain,smooth muscle                        |
| Q7L7L0 | ENSG0000 HIST3H2A | Supported | Tissue enh Detected i brain,lymphoid tissue                      |
| Q7RTS5 | ENSG0000 OTOP3    | NULL      | Group enr Detected i esophagus,intestine                         |
| Q7RTU3 | ENSG0000 OLIG3    | Uncertain | Tissue enh Detected i brain,esophagus,placenta                   |
| Q7RTU4 | ENSG0000 BHLHA9   | NULL      | Tissue enr Detected i brain                                      |
| Q7Z2G1 | ENSG0000 H2BFWT   | Uncertain | Tissue enh Detected i testis                                     |
| Q7Z3S9 | ENSG0000 NOTCH2N  | Uncertain | Tissue enh Detected i blood                                      |
| Q7Z3Y9 | ENSG0000 KRT26    | Enhanced  | Group enr Detected i blood,skin 1,testis                         |
| Q7Z3Z2 | ENSG0000 RD3      | Approved  | Low tissue Detected i NULL                                       |
| Q7Z410 | ENSG0000 TMPRSS9  | Uncertain | Tissue enh Detected i liver,lymphoid tissue,testis               |
| Q7Z418 | ENSG0000 KCNK18   | Uncertain | Group enr Detected i brain,testis                                |
| Q7Z443 | ENSG0000 PKD1L3   | NULL      | Tissue enh Detected i lymphoid tissue,smooth muscle,testis       |
| Q7Z4H4 | ENSG0000 ADM2     | NULL      | Tissue enh Detected i pancreas,salivary gland                    |
| Q7Z6K4 | ENSG0000 NRARP    | Approved  | Tissue enh Detected i intestine                                  |
| Q86SG2 | ENSG0000 ANKRD23  | Approved  | Tissue enr Detected i skeletal muscle                            |
| Q86SG3 | ENSG0000 DAZ4     | Approved  | Group enr Detected i stomach 1,testis                            |
| Q86TG1 | ENSG0000 TMEM150  | Uncertain | Low tissue Detected i NULL                                       |
| Q86UD3 | ENSG0000 3-Mar    | Uncertain | Low tissue Detected i NULL                                       |
| Q86UP8 | ENSG0000 GTF2IRD2 | NULL      | Low tissue Detected i NULL                                       |
| Q86UU9 | ENSG0000 TAC4     | NULL      | Tissue enh Detected i liver,pituitary gland                      |
| Q86UV6 | ENSG0000 TRIM74   | NULL      | Tissue enh Detected i stomach 1                                  |
| Q86V35 | ENSG0000 CABP7    | Uncertain | Tissue enh Detected i brain,pancreas                             |
| Q86WD7 | ENSG0000 SERPINA9 | NULL      | Tissue enr Detected i lymphoid tissue                            |
| Q86X19 | ENSG0000 TMEM17   | Uncertain | Low tissue Detected i NULL                                       |
| Q86XJ0 | ENSG0000 CALHM3   | Uncertain | Tissue enh Detected i blood,pancreas,testis                      |
| Q86XS5 | ENSG0000 ANGPTL5  | Uncertain | Tissue enh Detected i adipose tissue,ovary                       |
| Q86XT4 | ENSG0000 TRIM50   | Uncertain | Group enr Detected i pancreas,stomach 1                          |
| Q86YD7 | ENSG0000 FAM90A1  | NULL      | Tissue enh Detected i brain                                      |
| Q86YV6 | ENSG0000 MYLK4    | Uncertain | Group enr Detected i skeletal muscle,tongue                      |
| Q86YW7 | ENSG0000 GPHB5    | NULL      | Tissue enr Detected i testis                                     |
| Q8HWS3 | ENSG0000 RFX6     | Approved  | Tissue enh Detected i adrenal gland,intestine,pancreas,stomach : |
| Q8IU57 | ENSG0000 IFNLR1   | Uncertain | Low tissue Detected i NULL                                       |
| Q8IU99 | ENSG0000 CALHM1   | Enhanced  | Tissue enh Detected i brain,kidney,lymphoid tissue               |

|        |                   |           |                                                                 |
|--------|-------------------|-----------|-----------------------------------------------------------------|
| Q8IUC2 | ENSG0000 KRTAP8-1 | NULL      | Tissue enr Detected i skin 1                                    |
| Q8IUE0 | ENSG0000 TGIF2LY  | NULL      | Tissue enr Detected i testis                                    |
| Q8IUM7 | ENSG0000 NPAS4    | Uncertain | Group enr Detected i brain,pituitary gland                      |
| Q8IV77 | ENSG0000 CNGA4    | NULL      | Tissue enh Detected i epididymis,fallopian tube,ovary           |
| Q8IWL8 | ENSG0000 STH      | NULL      | Tissue enh Detected i brain,breast,placenta,skeletal muscle     |
| Q8IWR1 | ENSG0000 TRIM59   | Uncertain | Tissue enh Detected i brain,lymphoid tissue                     |
| Q8IWX5 | ENSG0000 SGPP2    | NULL      | Low tissue Detected i NULL                                      |
| Q8IX05 | ENSG0000 CD302    | NULL      | Tissue enh Detected i liver                                     |
| Q8IXL9 | ENSG0000 IQCF2    | NULL      | Tissue enr Detected i testis                                    |
| Q8IY49 | ENSG0000 MMD2     | NULL      | Group enr Detected i brain,testis                               |
| Q8IY84 | ENSG0000 NIM1K    | Uncertain | Group enr Detected i brain,pituitary gland                      |
| Q8IYD2 | ENSG0000 KLHDC8A  | NULL      | Tissue enr Detected i ovary                                     |
| Q8IYF1 | ENSG0000 ELOA2    | Approved  | Tissue enr Detected i testis                                    |
| Q8IYX0 | ENSG0000 ZNF679   | NULL      | Tissue enr Detected i testis                                    |
| Q8IZ08 | ENSG0000 GPR135   | Uncertain | Tissue enh Detected i testis                                    |
| Q8IZ57 | ENSG0000 NRSN1    | Uncertain | Tissue enr Detected i brain                                     |
| Q8IZI9 | ENSG0000 IFNL3    | NULL      | Tissue enh Detected i brain,salivary gland,skin 1,testis        |
| Q8IZP1 | ENSG0000 TBC1D3   | Approved  | Tissue enh Detected i endometrium 1,intestine,lymphoid tissue,t |
| Q8IZT8 | ENSG0000 HS3ST5   | Approved  | Tissue enh Detected i brain,seminal vesicle,skeletal muscle     |
| Q8IZU0 | ENSG0000 FAM9B    | Uncertain | Tissue enh Detected i blood,liver,testis                        |
| Q8IZX4 | ENSG0000 TAF1L    | Uncertain | Tissue enr Detected i testis                                    |
| Q8IZY5 | ENSG0000 BLID     | NULL      | Tissue enh Detected i ovary                                     |
| Q8N100 | ENSG0000 ATOH7    | Uncertain | Group enr Detected i brain,liver                                |
| Q8N104 | ENSG0000 DEFB106A | Supported | Tissue enr Detected i epididymis                                |
| Q8N112 | ENSG0000 LSMEM2   | NULL      | Group enr Detected i heart muscle,skeletal muscle,tongue        |
| Q8N144 | ENSG0000 GJD3     | NULL      | Tissue enh Detected i lymphoid tissue                           |
| Q8N1L9 | ENSG0000 BATF2    | Approved  | Low tissue Detected i NULL                                      |
| Q8N1N2 | ENSG0000 DYNAP    | Uncertain | Group enr Detected i esophagus,tongue                           |
| Q8N1N5 | ENSG0000 UVSSA    | Approved  | Low tissue Detected i NULL                                      |
| Q8N2E6 | ENSG0000 TOR2A    | Approved  | Low tissue Detected i NULL                                      |
| Q8N2N9 | ENSG0000 ANKRD36f | NULL      | Tissue enh Detected i bone marrow                               |
| Q8N328 | ENSG0000 ERCC6    | NULL      | Low tissue Detected i NULL                                      |
| Q8N446 | ENSG0000 ZNF843   | Uncertain | Low tissue Detected i NULL                                      |
| Q8N4F7 | ENSG0000 RNF175   | Uncertain | Tissue enh Detected i brain                                     |
| Q8N4L8 | ENSG0000 CCDC24   | Uncertain | Low tissue Detected i NULL                                      |
| Q8N661 | ENSG0000 TMEM86B  | Uncertain | Tissue enh Detected i liver                                     |
| Q8N693 | ENSG0000 ESX1     | Enhanced  | Tissue enr Detected i testis                                    |
| Q8N6F8 | ENSG0000 METTL27  | Uncertain | Low tissue Detected i NULL                                      |
| Q8N6R1 | ENSG0000 SERP2    | Uncertain | Tissue enh Detected i brain                                     |
| Q8N7E2 | ENSG0000 CBLL2    | NULL      | Tissue enr Detected i testis                                    |
| Q8N841 | ENSG0000 TTLL6    | Enhanced  | Tissue enh Detected i fallopian tube,intestine,testis           |
| Q8N895 | ENSG0000 ZNF366   | Uncertain | Tissue enh Detected i adipose tissue                            |
| Q8N8F6 | ENSG0000 YIPF7    | Uncertain | Group enr Detected i skeletal muscle,tongue                     |
| Q8N8W4 | ENSG0000 PNPLA1   | NULL      | Tissue enh Detected i blood,skin 1                              |
| Q8N8X9 | ENSG0000 MAB21L3  | Uncertain | Tissue enh Detected i esophagus,skin 1                          |
| Q8N966 | ENSG0000 ZDHHC22  | NULL      | Tissue enr Detected i brain                                     |
| Q8NA57 | ENSG0000 C12orf50 | NULL      | Tissue enr Detected i testis                                    |

|        |                   |           |            |                                                     |
|--------|-------------------|-----------|------------|-----------------------------------------------------|
| Q8NA77 | ENSG0000 TEX19    | Enhanced  | Tissue enr | Detected i testis                                   |
| Q8NBB4 | ENSG0000 ZSCAN1   | Uncertain | Tissue enh | Detected i brain,epididymis,pituitary gland         |
| Q8NBH2 | ENSG0000 KY       | Uncertain | Tissue enh | Detected i skeletal muscle,tongue                   |
| Q8NCM2 | ENSG0000 KCNH5    | Uncertain | Tissue enh | Detected i adrenal gland,brain,retina               |
| Q8NDQ6 | ENSG0000 ZNF540   | Supported | Tissue enh | Detected i pituitary gland                          |
| Q8NDV2 | ENSG0000 GPR26    | Enhanced  | Tissue enr | Detected i brain                                    |
| Q8NDX9 | ENSG0000 LY6G5B   | Approved  | Low tissue | Detected i NULL                                     |
| Q8NEG5 | ENSG0000 ZSWIM2   | NULL      | Tissue enr | Detected i testis                                   |
| Q8NEQ6 | ENSG0000 SRARP    | Uncertain | Tissue enh | Detected i brain,breast                             |
| Q8NER1 | ENSG0000 TRPV1    | NULL      | Tissue enh | Detected i liver                                    |
| Q8NET4 | ENSG0000 RTL9     | Enhanced  | Tissue enr | Detected i testis                                   |
| Q8NEV9 | ENSG0000 IL27     | Approved  | Tissue enh | Detected i blood,brain,liver                        |
| Q8NEW7 | ENSG0000 TMIE     | Uncertain | Tissue enh | Detected i adrenal gland,brain                      |
| Q8NFB6 | ENSG0000 PROKR2   | Uncertain | Tissue enh | Detected i bone marrow,brain                        |
| Q8NFR3 | ENSG0000 SPTSSB   | NULL      | Tissue enh | Detected i blood,skin 1,stomach 1                   |
| Q8NFR9 | ENSG0000 IL17RE   | Uncertain | Tissue enh | Detected i intestine                                |
| Q8NG57 | ENSG0000 ELOA3    | Uncertain | Not detect | Not detect NULL                                     |
| Q8NHU0 | ENSG0000 CT45A3   | Supported | Tissue enr | Detected i testis                                   |
| Q8NHW4 | ENSG0000 CCL4L2   | NULL      | Tissue enh | Detected i blood,bone marrow,lung                   |
| Q8TAE7 | ENSG0000 KCNG3    | NULL      | Tissue enh | Detected i brain                                    |
| Q8TAF8 | ENSG0000 LHFPL5   | Uncertain | Group enr  | Detected i bone marrow,brain,epididymis,pancreas    |
| Q8TAL5 | ENSG0000 C9orf43  | NULL      | Tissue enr | Detected i testis                                   |
| Q8TBM7 | ENSG0000 TMEM254  | Approved  | Low tissue | Detected i NULL                                     |
| Q8TCW9 | ENSG0000 PROKR1   | Uncertain | Tissue enh | Detected i adipose tissue,epididymis                |
| Q8TCY5 | ENSG0000 MRAP     | Uncertain | Group enr  | Detected i adipose tissue,adrenal gland,breast      |
| Q8TD91 | ENSG0000 MAGEC3   | Approved  | Tissue enh | Detected i brain,epididymis,testis                  |
| Q8TDD2 | ENSG0000 SP7      | Enhanced  | Tissue enh | Detected i brain,lymphoid tissue,testis             |
| Q8TDE3 | ENSG0000 RNASE8   | NULL      | Tissue enr | Detected i salivary gland                           |
| Q8TDI8 | ENSG0000 TMC1     | NULL      | Tissue enh | Detected i cervix, uterine                          |
| Q8TDN1 | ENSG0000 KCNG4    | NULL      | Tissue enh | Detected i retina                                   |
| Q8TDN7 | ENSG0000 ACER1    | NULL      | Group enr  | Detected i esophagus,skin 1,tongue                  |
| Q8TDT2 | ENSG0000 GPR152   | Uncertain | Tissue enh | Detected i intestine,lymphoid tissue                |
| Q8TDU9 | ENSG0000 RXFP4    | NULL      | Group enr  | Detected i blood,bone marrow,intestine              |
| Q8TDV5 | ENSG0000 GPR119   | NULL      | Tissue enh | Detected i intestine,pancreas                       |
| Q8TE12 | ENSG0000 LMX1A    | NULL      | Tissue enh | Detected i brain,pituitary gland                    |
| Q8TE60 | ENSG0000 ADAMTS1  | Uncertain | Group enr  | Detected i adipose tissue,brain,placenta            |
| Q8TE69 | ENSG0000 CXorf40A | Approved  | Low tissue | Detected i NULL                                     |
| Q8TF45 | ENSG0000 ZNF418   | Approved  | Low tissue | Detected i NULL                                     |
| Q8TF63 | ENSG0000 DCANP1   | Uncertain | Tissue enh | Detected i blood,intestine,lymphoid tissue,skin 1   |
| Q8WU08 | ENSG0000 STK32A   | Uncertain | Tissue enh | Detected i adrenal gland,brain,retina               |
| Q8WU68 | ENSG0000 U2AF1L4  | Supported | Low tissue | Detected i NULL                                     |
| Q8WUU8 | ENSG0000 TMEM174  | Enhanced  | Tissue enr | Detected i kidney                                   |
| Q8WV35 | ENSG0000 LRRC29   | Uncertain | Low tissue | Detected i NULL                                     |
| Q8WWG1 | ENSG0000 NRG4     | Uncertain | Tissue enr | Detected i pancreas                                 |
| Q8WWN9 | ENSG0000 IPCEF1   | Enhanced  | Group enr  | Detected i blood,bone marrow,brain,lymphoid tissue, |
| Q8WXA8 | ENSG0000 HTR3C    | NULL      | Tissue enr | Detected i lung                                     |
| Q8WXD0 | ENSG0000 RXFP2    | NULL      | Tissue enh | Detected i brain,epididymis                         |

|        |                    |           |                                                                |
|--------|--------------------|-----------|----------------------------------------------------------------|
| Q8WXF3 | ENSG0000 RLN3      | NULL      | Tissue enh Detected i blood,parathyroid gland,testis           |
| Q8WXG8 | ENSG0000 S100Z     | Approved  | Tissue enh Detected i blood,lymphoid tissue                    |
| Q8WXK4 | ENSG0000 ASB12     | Uncertain | Group enr Detected i skeletal muscle,tongue                    |
| Q8WZ04 | ENSG0000 LRTOMT    | Approved  | Tissue enh Detected i fallopian tube,testis                    |
| Q8WZ33 | ENSG0000 AC145212  | NULL      | Low tissue Detected i NULL                                     |
| Q92731 | ENSG0000 ESR2      | Enhanced  | Tissue enh Detected i ovary,testis,vagina                      |
| Q92737 | ENSG0000 RASL10A   | Approved  | Tissue enr Detected i brain                                    |
| Q92847 | ENSG0000 GHSR      | NULL      | Tissue enh Detected i adrenal gland,blood,pituitary gland      |
| Q92886 | ENSG0000 NEUROG1   | NULL      | Group enr Detected i brain,retina,testis                       |
| Q92915 | ENSG0000 FGF14     | NULL      | Group enr Detected i brain,cervix, uterine,fallopian tube      |
| Q92988 | ENSG0000 DLX4      | Uncertain | Tissue enh Detected i placenta,skin 1                          |
| Q93077 | ENSG0000 HIST1H2AI | Supported | Group enr Detected i blood,lymphoid tissue                     |
| Q93079 | ENSG0000 HIST1H2BI | Supported | Tissue enr Detected i lymphoid tissue                          |
| Q969D9 | ENSG0000 TSLP      | NULL      | Low tissue Detected i NULL                                     |
| Q969J5 | ENSG0000 IL22RA2   | Uncertain | Group enr Detected i breast,lymphoid tissue,placenta           |
| Q969Q0 | ENSG0000 RPL36AL   | NULL      | Low tissue Detected i NULL                                     |
| Q969S6 | ENSG0000 TMEM203   | NULL      | Low tissue Detected i NULL                                     |
| Q969V1 | ENSG0000 MCHR2     | NULL      | Group enr Detected i brain,testis                              |
| Q969W0 | ENSG0000 SPTSSA    | NULL      | Low tissue Detected i NULL                                     |
| Q96A44 | ENSG0000 SPSB4     | NULL      | Tissue enr Detected i pancreas                                 |
| Q96A72 | ENSG0000 MAGOHB    | Uncertain | Low tissue Detected i NULL                                     |
| Q96AQ7 | ENSG0000 CIDEA     | Approved  | Group enr Detected i adipose tissue,breast,intestine           |
| Q96AQ9 | ENSG0000 FAM131C   | Uncertain | Tissue enh Detected i brain                                    |
| Q96BM0 | ENSG0000 IFI27L1   | NULL      | Tissue enh Detected i testis                                   |
| Q96BQ3 | ENSG0000 TRIM43    | Uncertain | Tissue enh Detected i brain,stomach 1,testis                   |
| Q96D03 | ENSG0000 DDIT4L    | NULL      | Tissue enr Detected i skeletal muscle                          |
| Q96D59 | ENSG0000 RNF183    | Uncertain | Tissue enh Detected i epididymis,kidney                        |
| Q96DL1 | ENSG0000 NXPE2     | Enhanced  | Group enr Detected i epididymis,salivary gland                 |
| Q96ET8 | ENSG0000 TVP23C    | Uncertain | Low tissue Detected i NULL                                     |
| Q96G61 | ENSG0000 NUDT11    | Approved  | Tissue enh Detected i brain,testis                             |
| Q96J65 | ENSG0000 ABCC12    | Uncertain | Group enr Detected i brain,testis                              |
| Q96JQ5 | ENSG0000 MS4A4A    | Approved  | Tissue enh Detected i adipose tissue                           |
| Q96KK3 | ENSG0000 KCNS1     | NULL      | Tissue enh Detected i brain                                    |
| Q96KK5 | ENSG0000 HIST1H2AI | Supported | Tissue enr Detected i lymphoid tissue                          |
| Q96LB1 | ENSG0000 MRGPRX2   | Approved  | Tissue enh Detected i smooth muscle                            |
| Q96LB2 | ENSG0000 MRGPRX1   | NULL      | Not detect Not detect NULL                                     |
| Q96LB9 | ENSG0000 PGLYRP3   | Uncertain | Tissue enh Detected i esophagus,skin 1,vagina                  |
| Q96MZ4 | ENSG0000 FAM218A   | NULL      | Low tissue Detected i NULL                                     |
| Q96NL1 | ENSG0000 TMEM74    | Uncertain | Tissue enh Detected i brain                                    |
| Q96NS5 | ENSG0000 ASB16     | Approved  | Tissue enh Detected i skeletal muscle,tongue                   |
| Q96P66 | ENSG0000 GPR101    | Uncertain | Tissue enr Detected i brain                                    |
| Q96P69 | ENSG0000 GPR78     | Uncertain | Tissue enr Detected i placenta                                 |
| Q96PC2 | ENSG0000 IP6K3     | Approved  | Group enr Detected i brain,skeletal muscle                     |
| Q96PD4 | ENSG0000 IL17F     | NULL      | Group enr Detected i esophagus,lymphoid tissue,urinary bladder |
| Q96PS8 | ENSG0000 AQP10     | Enhanced  | Tissue enr Detected i intestine                                |
| Q96Q35 | ENSG0000 ALS2CR12  | NULL      | Tissue enh Detected i brain,epididymis,testis                  |
| Q96Q77 | ENSG0000 CIB3      | Uncertain | Group enr Detected i blood,bone marrow,testis                  |

|        |                   |           |            |                                                       |
|--------|-------------------|-----------|------------|-------------------------------------------------------|
| Q96QA6 | ENSG0000 YPEL2    | Uncertain | Low tissue | Detected i NULL                                       |
| Q96QI5 | ENSG0000 HS3ST6   | NULL      | Tissue enh | Detected i esophagus,skin 1                           |
| Q96QS6 | ENSG0000 PSKH2    | Uncertain | Group enr  | Detected i kidney,placenta,testis                     |
| Q96RJ6 | ENSG0000 FERD3L   | Uncertain | Tissue enh | Detected i brain,pituitary gland                      |
| Q96RP3 | ENSG0000 UCN2     | Uncertain | Tissue enh | Detected i skin 1,vagina                              |
| Q96SE0 | ENSG0000 ABHD1    | Uncertain | Tissue enr | Detected i testis                                     |
| Q96T53 | ENSG0000 MBOAT4   | NULL      | Tissue enh | Detected i pancreas,stomach 1                         |
| Q96T55 | ENSG0000 KCNK16   | NULL      | Tissue enh | Detected i pancreas,stomach 1                         |
| Q99217 | ENSG0000 AMELX    | NULL      | Tissue enh | Detected i ductus deferens,epididymis,seminal vesicle |
| Q99527 | ENSG0000 GPER1    | Approved  | Low tissue | Detected i NULL                                       |
| Q99616 | ENSG0000 CCL13    | NULL      | Low tissue | Detected i NULL                                       |
| Q99665 | ENSG0000 IL12RB2  | Uncertain | Tissue enh | Detected i blood,pancreas                             |
| Q99677 | ENSG0000 LPAR4    | Uncertain | Tissue enh | Detected i brain,ovary                                |
| Q99678 | ENSG0000 GPR20    | NULL      | Low tissue | Detected i NULL                                       |
| Q99705 | ENSG0000 MCHR1    | NULL      | Tissue enh | Detected i brain                                      |
| Q99748 | ENSG0000 NRTN     | NULL      | Tissue enh | Detected i heart muscle,pancreas                      |
| Q99819 | ENSG0000 ARHGDIG  | NULL      | Group enr  | Detected i brain,intestine,pancreas                   |
| Q99865 | ENSG0000 SPIN2A   | Uncertain | Low tissue | Detected i NULL                                       |
| Q9BQ31 | ENSG0000 KCNS3    | Approved  | Tissue enh | Detected i skeletal muscle                            |
| Q9BQ66 | ENSG0000 KRTAP4-1 | NULL      | Tissue enr | Detected i skin 1                                     |
| Q9BQJ4 | ENSG0000 TMEM47   | Approved  | Low tissue | Detected i NULL                                       |
| Q9BQS6 | ENSG0000 HSPB9    | NULL      | Tissue enh | Detected i blood,pancreas,testis                      |
| Q9BR10 | ENSG0000 SPATA25  | NULL      | Tissue enh | Detected i testis                                     |
| Q9BV97 | ENSG0000 ZNF747   | Uncertain | Low tissue | Detected i NULL                                       |
| Q9BVW6 | ENSG0000 SMIM2    | Enhanced  | Tissue enr | Detected i testis                                     |
| Q9BXC0 | ENSG0000 HCAR1    | NULL      | Tissue enh | Detected i breast,parathyroid gland                   |
| Q9BXC8 | ENSG0000 SPZ1     | NULL      | Tissue enr | Detected i testis                                     |
| Q9BXT2 | ENSG0000 CACNG6   | NULL      | Group enr  | Detected i blood,skeletal muscle                      |
| Q9BXU2 | ENSG0000 TEX13B   | NULL      | Tissue enr | Detected i testis                                     |
| Q9BXU7 | ENSG0000 USP26    | NULL      | Tissue enr | Detected i testis                                     |
| Q9BXU9 | ENSG0000 CALN1    | Approved  | Tissue enh | Detected i adrenal gland,brain,lymphoid tissue        |
| Q9BYR9 | ENSG0000 KRTAP2-4 | Supported | Tissue enr | Detected i skin 1                                     |
| Q9BZA8 | ENSG0000 PCDH11Y  | NULL      | Tissue enh | Detected i brain,seminal vesicle                      |
| Q9BZE7 | ENSG0000 C22orf23 | NULL      | Tissue enr | Detected i testis                                     |
| Q9BZG2 | ENSG0000 ACP4     | NULL      | Tissue enh | Detected i skin 1,testis                              |
| Q9BZJ8 | ENSG0000 GPR61    | Approved  | Tissue enh | Detected i brain,pituitary gland,retina               |
| Q9BZL3 | ENSG0000 SMIM3    | NULL      | Group enr  | Detected i adipose tissue,blood,bone marrow,pancreas  |
| Q9BZM2 | ENSG0000 PLA2G2F  | NULL      | Tissue enh | Detected i lymphoid tissue,skin 1,urinary bladder     |
| Q9C0J1 | ENSG0000 B3GNT4   | Uncertain | Tissue enh | Detected i brain,skin 1                               |
| Q9GZQ8 | ENSG0000 MAP1LC3F | Uncertain | Low tissue | Detected i NULL                                       |
| Q9GZZ6 | ENSG0000 CHRNA10  | NULL      | Tissue enr | Detected i skeletal muscle                            |
| Q9GZZ7 | ENSG0000 GFRA4    | NULL      | Tissue enh | Detected i brain,thyroid gland                        |
| Q9H0A6 | ENSG0000 RNF32    | Enhanced  | Tissue enr | Detected i testis                                     |
| Q9H0N0 | ENSG0000 RAB6C    | Uncertain | Tissue enh | Detected i parathyroid gland                          |
| Q9H0W7 | ENSG0000 THAP2    | Approved  | Low tissue | Detected i NULL                                       |
| Q9H0X6 | ENSG0000 RNF208   | Uncertain | Tissue enh | Detected i brain                                      |
| Q9H112 | ENSG0000 CST11    | Enhanced  | Tissue enr | Detected i epididymis                                 |

|        |                  |           |                                                                            |
|--------|------------------|-----------|----------------------------------------------------------------------------|
| Q9H1J5 | ENSG0000 WNT8A   | Uncertain | Tissue enh Detected i brain,testis                                         |
| Q9H205 | ENSG0000 OR2AG1  | NULL      | Tissue enh Detected i blood                                                |
| Q9H252 | ENSG0000 KCNH6   | Approved  | Tissue enh Detected i intestine,kidney,pituitary gland,retina              |
| Q9H295 | ENSG0000 DCSTAMP | NULL      | Group enr Detected i adipose tissue,lung                                   |
| Q9H2R5 | ENSG0000 KLK15   | Uncertain | Tissue enh Detected i intestine,salivary gland                             |
| Q9H2W2 | ENSG0000 MIXL1   | NULL      | Tissue enh Detected i blood,lymphoid tissue                                |
| Q9H306 | ENSG0000 MMP27   | Approved  | Tissue enh Detected i breast,tongue                                        |
| Q9H310 | ENSG0000 RHBG    | Enhanced  | Group enr Detected i brain,kidney,ovary                                    |
| Q9H324 | ENSG0000 ADAMTS1 | Uncertain | Low tissue Detected i NULL                                                 |
| Q9H3M0 | ENSG0000 KCNF1   | Enhanced  | Tissue enr Detected i brain                                                |
| Q9H3Y6 | ENSG0000 SRMS    | Uncertain | Tissue enh Detected i epididymis                                           |
| Q9H4Q4 | ENSG0000 PRDM12  | Uncertain | Tissue enh Detected i brain                                                |
| Q9H9S0 | ENSG0000 NANOG   | Supported | Tissue enh Detected i blood,testis                                         |
| Q9HB03 | ENSG0000 ELOVL3  | Enhanced  | Tissue enh Detected i skin 1                                               |
| Q9HB15 | ENSG0000 KCNK12  | NULL      | Tissue enr Detected i brain                                                |
| Q9HB29 | ENSG0000 IL1RL2  | Uncertain | Tissue enh Detected i skin 1                                               |
| Q9HBY0 | ENSG0000 NOX3    | NULL      | Tissue enh Detected i adrenal gland                                        |
| Q9HC23 | ENSG0000 PROK2   | Approved  | Tissue enh Detected i blood,bone marrow                                    |
| Q9HCX4 | ENSG0000 TRPC7   | Uncertain | Tissue enh Detected i adrenal gland,brain,intestine,kidney,pituitary gland |
| Q9HD90 | ENSG0000 NEUROD4 | Enhanced  | Tissue enr Detected i pituitary gland                                      |
| Q9NP95 | ENSG0000 FGF20   | NULL      | Tissue enh Detected i brain                                                |
| Q9NPA1 | ENSG0000 KCNMB3  | Approved  | Low tissue Detected i NULL                                                 |
| Q9NPB3 | ENSG0000 CABP2   | NULL      | Tissue enr Detected i retina                                               |
| Q9NPB9 | ENSG0000 ACKR4   | NULL      | Tissue enh Detected i intestine,salivary gland                             |
| Q9NPC2 | ENSG0000 KCNK9   | NULL      | Group enr Detected i adrenal gland,brain                                   |
| Q9NPH9 | ENSG0000 IL26    | NULL      | Tissue enh Detected i lymphoid tissue,tongue,urinary bladder               |
| Q9NPZ5 | ENSG0000 B3GAT2  | Uncertain | Tissue enr Detected i brain                                                |
| Q9NQR9 | ENSG0000 G6PC2   | NULL      | Group enr Detected i pancreas,retina                                       |
| Q9NQV7 | ENSG0000 PRDM9   | Uncertain | Tissue enh Detected i blood,epididymis,testis                              |
| Q9NQW1 | ENSG0000 SEC31B  | Uncertain | Low tissue Detected i NULL                                                 |
| Q9NQW5 | ENSG0000 PRDM7   | Approved  | Tissue enr Detected i testis                                               |
| Q9NQW8 | ENSG0000 CNGB3   | Enhanced  | Tissue enr Detected i retina                                               |
| Q9NQZ3 | ENSG0000 DAZ1    | Supported | Group enr Detected i stomach 1,testis                                      |
| Q9NR20 | ENSG0000 DYRK4   | Enhanced  | Tissue enr Detected i testis                                               |
| Q9NR21 | ENSG0000 PARP11  | Uncertain | Low tissue Detected i NULL                                                 |
| Q9NR90 | ENSG0000 DAZ3    | Approved  | Tissue enh Detected i stomach 1,testis                                     |
| Q9NRC9 | ENSG0000 OTOR    | Uncertain | Tissue enh Detected i brain,stomach 1                                      |
| Q9NRQ5 | ENSG0000 SMCO4   | Uncertain | Tissue enh Detected i salivary gland                                       |
| Q9NS75 | ENSG0000 CYSLTR2 | Uncertain | Tissue enh Detected i blood,ductus deferens,placenta,seminal ve            |
| Q9NSD7 | ENSG0000 RXFP3   | Uncertain | Group enr Detected i adrenal gland,brain,pancreas,pituitary gland          |
| Q9NSN8 | ENSG0000 SNTG1   | Enhanced  | Group enr Detected i brain,lymphoid tissue,pituitary gland                 |
| Q9NTI7 | ENSG0000 FAM212B | Approved  | Low tissue Detected i NULL                                                 |
| Q9NTQ9 | ENSG0000 GJB4    | Enhanced  | Tissue enh Detected i epididymis,skin 1                                    |
| Q9NU63 | ENSG0000 ZFP57   | Uncertain | Tissue enh Detected i brain,heart muscle                                   |
| Q9NV12 | ENSG0000 TMEM140 | NULL      | Tissue enh Detected i blood                                                |
| Q9NV39 | ENSG0000 PRR34   | NULL      | Tissue enh Detected i breast                                               |
| Q9NVL1 | ENSG0000 FAM86C1 | NULL      | Low tissue Detected i NULL                                                 |

|         |                   |           |            |            |                                      |
|---------|-------------------|-----------|------------|------------|--------------------------------------|
| Q9NVV2  | ENSG0000 C19orf73 | Uncertain | Low tissue | Detected i | NULL                                 |
| Q9NWF4  | ENSG0000 SLC52A1  | NULL      | Group enr  | Detected i | intestine,placenta                   |
| Q9NWW9  | ENSG0000 HRASLS2  | Approved  | Tissue enh | Detected i | blood,intestine                      |
| Q9NXI6  | ENSG0000 RNF186   | Enhanced  | Group enr  | Detected i | epididymis,intestine,kidney,pancreas |
| Q9NY37  | ENSG0000 ASIC5    | Approved  | Tissue enr | Detected i | intestine                            |
| Q9NYV7  | ENSG0000 TAS2R16  | NULL      | Not detect | Not detect | NULL                                 |
| Q9NYV8  | ENSG0000 TAS2R14  | NULL      | Low tissue | Detected i | NULL                                 |
| Q9NYV9  | ENSG0000 TAS2R13  | NULL      | Tissue enh | Detected i | epididymis                           |
| Q9NYW0  | ENSG0000 TAS2R10  | NULL      | Low tissue | Detected i | NULL                                 |
| Q9NYW1  | ENSG0000 TAS2R9   | NULL      | Tissue enh | Detected i | cervix, uterine                      |
| Q9NYW2  | ENSG0000 TAS2R8   | NULL      | Tissue enh | Detected i | brain                                |
| Q9NYW3  | ENSG0000 TAS2R7   | NULL      | Not detect | Not detect | NULL                                 |
| Q9NYW4  | ENSG0000 TAS2R5   | NULL      | Tissue enh | Detected i | skin 1                               |
| Q9NYW5  | ENSG0000 TAS2R4   | NULL      | Tissue enh | Detected i | brain                                |
| Q9NYW7  | ENSG0000 TAS2R1   | Uncertain | Tissue enr | Detected i | testis                               |
| Q9NYZ1  | ENSG0000 TVP23B   | Uncertain | Low tissue | Detected i | NULL                                 |
| Q9NZD1  | ENSG0000 GPRC5D   | Approved  | Tissue enh | Detected i | blood,skin 1                         |
| Q9NZH5  | ENSG0000 PTTG2    | Uncertain | Tissue enh | Detected i | lymphoid tissue                      |
| Q9NZH7  | ENSG0000 IL36B    | Uncertain | Group enr  | Detected i | esophagus,lymphoid tissue,skin 1     |
| Q9NZK7  | ENSG0000 PLA2G2E  | Uncertain | Group enr  | Detected i | lymphoid tissue,skin 1               |
| Q9NZP6  | ENSG0000 NPAP1    | Uncertain | Tissue enr | Detected i | testis                               |
| Q9NZR4  | ENSG0000 VSX1     | NULL      | Group enr  | Detected i | brain,retina                         |
| Q9POL9  | ENSG0000 PKD2L1   | Uncertain | Tissue enh | Detected i | brain,lymphoid tissue                |
| Q9POM4  | ENSG0000 IL17C    | Supported | Tissue enh | Detected i | endometrium 1                        |
| Q9PON5  | ENSG0000 TMEM216  | NULL      | Low tissue | Detected i | NULL                                 |
| Q9PON8  | ENSG0000 2-Mar    | Approved  | Low tissue | Detected i | NULL                                 |
| Q9POW0  | ENSG0000 IFNK     | NULL      | Tissue enh | Detected i | brain,skin 1                         |
| Q9UBD0  | ENSG0000 HSF1,HSF | Approved, | Low tissue | Detected i | testis                               |
| Q9UBD3  | ENSG0000 XCL2     | Approved  | Tissue enh | Detected i | blood                                |
| Q9UBK5  | ENSG0000 HCST     | Enhanced  | Tissue enh | Detected i | blood,bone marrow,lymphoid tissue    |
| Q9UBK7  | ENSG0000 RABL2A   | Approved  | Tissue enh | Detected i | fallopian tube                       |
| Q9UBX0  | ENSG0000 HESX1    | Approved  | Tissue enh | Detected i | ductus deferens,lymphoid tissue      |
| Q9UBX2  | ENSG0000 DUX4     | NULL      | Tissue enh | Detected i | testis                               |
| Q9UHC3  | ENSG0000 ASIC3    | Enhanced  | Tissue enh | Detected i | brain                                |
| Q9UHM6  | ENSG0000 OPN4     | Approved  | Group enr  | Detected i | brain,skeletal muscle                |
| Q9UI33  | ENSG0000 SCN11A   | Uncertain | Tissue enh | Detected i | lymphoid tissue,placenta             |
| Q9UI96  | ENSG0000 KCNG2    | Enhanced  | Tissue enr | Detected i | brain                                |
| Q9UIJW3 | ENSG0000 DNMT3L   | Approved  | Group enr  | Detected i | kidney,liver                         |
| Q9UIJW9 | ENSG0000 SERTAD3  | NULL      | Low tissue | Detected i | NULL                                 |
| Q9UKG4  | ENSG0000 SLC13A4  | Approved  | Group enr  | Detected i | brain,placenta,retina                |
| Q9UKN7  | ENSG0000 MYO15A   | Enhanced  | Tissue enr | Detected i | pituitary gland                      |
| Q9ULD8  | ENSG0000 KCNH3    | NULL      | Tissue enh | Detected i | brain                                |
| Q9ULS6  | ENSG0000 KCNS2    | Uncertain | Tissue enr | Detected i | brain                                |
| Q9UNA3  | ENSG0000 A4GNT    | Enhanced  | Group enr  | Detected i | gallbladder,pancreas,stomach 1       |
| Q9UNN4  | ENSG0000 GTF2A1L  | NULL      | Tissue enr | Detected i | testis                               |
| Q9UPM6  | ENSG0000 LHX6     | Approved  | Tissue enh | Detected i | brain                                |
| Q9XRX5  | ENSG0000 HHLA3    | Approved  | Low tissue | Detected i | NULL                                 |

|        |                    |           |                                                               |
|--------|--------------------|-----------|---------------------------------------------------------------|
| Q9Y258 | ENSG0000 CCL26     | NULL      | Tissue enh Detected i ovary,retina                            |
| Q9Y264 | ENSG0000 ANGPT4    | Uncertain | Tissue enh Detected i adipose tissue,breast,cervix, uterine   |
| Q9Y278 | ENSG0000 HS3ST2    | Approved  | Group enr Detected i adipose tissue,brain,lung                |
| Q9Y2M2 | ENSG0000 SSUH2     | Approved  | Tissue enr Detected i intestine                               |
| Q9Y2N7 | ENSG0000 HIF3A     | Approved  | Low tissue Detected i NULL                                    |
| Q9Y2T6 | ENSG0000 GPR55     | NULL      | Tissue enh Detected i brain,intestine,lymphoid tissue,testis  |
| Q9Y3D7 | ENSG0000 PAM16     | NULL      | Tissue enh Detected i skeletal muscle                         |
| Q9Y458 | ENSG0000 TBX22     | NULL      | Group enr Detected i testis,thyroid gland                     |
| Q9Y466 | ENSG0000 NR2E1     | Uncertain | Tissue enr Detected i brain                                   |
| Q9Y4R7 | ENSG0000 TLL3      | Approved  | Low tissue Detected i NULL                                    |
| Q9Y4Z2 | ENSG0000 NEUROG3   | Uncertain | Tissue enh Detected i brain,intestine                         |
| Q9Y5G1 | ENSG0000 PCDHGB3   | Uncertain | Low tissue Detected i NULL                                    |
| Q9Y5H9 | ENSG0000 PCDHA2    | Uncertain | Tissue enh Detected i brain                                   |
| Q9Y5K2 | ENSG0000 KLK4      | Enhanced  | Tissue enr Detected i prostate                                |
| Q9Y5N1 | ENSG0000 HRH3      | NULL      | Tissue enr Detected i brain                                   |
| Q9Y5X5 | ENSG0000 NPFFR2    | NULL      | Tissue enh Detected i lymphoid tissue,seminal vesicle         |
| Q9Y5Y9 | ENSG0000 SCN10A    | NULL      | Group enr Detected i heart muscle,testis                      |
| Q9Y663 | ENSG0000 HS3ST3A1  | Uncertain | Low tissue Detected i NULL                                    |
| Q9Y691 | ENSG0000 KCNMB2    | Uncertain | Tissue enh Detected i epididymis                              |
| Q9Y6C5 | ENSG0000 PTCH2     | NULL      | Tissue enh Detected i parathyroid gland,salivary gland,testis |
| Q9Y6F7 | ENSG0000 CDY2A,CD  | Supported | Group enr Detected i epididymis,testis                        |
| Q9Y6F8 | ENSG0000 CDY1,CDY: | Supported | Tissue enr Detected i testis                                  |

keletal muscle

sue, salivary gland





mach 1



y gland,smooth muscle

ina



d

stomach 1



:estis

thyroid gland



2

as

ary gland, testis

side  
id
